# Supplementary material for: Analysis of an alternative to the H-atom abstraction mechanism in methane C–H bond activation by nonheme iron(iv)-oxo oxidants
Source: Royal Society of Chemistry journal article supplement (doi:10.1039/c3dt50866h), 2013-01-01
Supplement: c3dt50866h.pdf [file c3dt50866h.pdf]

# Analysis of an alternative to the H-atom abstraction mechanism in methane C–H bond activation by nonheme iron(IV)–oxo oxidants

*Hao Tang, Jia Guan, Huiling Liu,\* and Xuri Huang\**

Institute of Theoretical Chemistry, State Key Laboratory of Theoretical and Computational Chemistry,  
Jilin University, Changchun, 130023, People's Republic of China

## **Supporting Information**

## Contents:

### Part 1

**Table S1-S2.** Energies of  $[\text{Fe}^{\text{IV}}=\text{O}(\text{TMC})(\text{L})]^+$ .

a) **Table S1.** Energy data in solution for  $[\text{Fe}^{\text{IV}}=\text{O}(\text{TMC})(\text{L})]^+$  with  $\text{L} = \text{SR}^-$ ,  $\text{OH}^-$ ,  $\text{F}^-$ , and  $\text{CF}_3\text{CO}_2^-$ .

b) **Table S2.** Energy data in the gas phase for  $[\text{Fe}^{\text{IV}}=\text{O}(\text{TMC})(\text{L})]^+$  with  $\text{L} = \text{SR}^-$ , and  $\text{OH}^-$ .

**Table S3.** Benchmark calculations (different functionals).

c) **Table S3.** Energies data in solution for  $[\text{Fe}^{\text{IV}}=\text{O}(\text{TMC})(\text{SR})]^+$ . (a) B3LYP/B1, B3LYP-G/B1, PBE0/B1 and B3LYP+VDW/B1; (b) B3LYP/B2//B1, B3LYP-G/B2//B1, PBE0/B2//B1 and B3LYP+VDW/B2//B1.

**Table S4-S5.** Energies for methane C-H bond hydroxylation.

d) **Table S4.** Relative energies data in solution of B3LYP, B3LYP-G, PBE0 and B3LYP+VDW for methane C-H bond hydroxylation by  $[\text{Fe}^{\text{IV}}=\text{O}(\text{TMC})(\text{L})]^+$  with  $\text{L} = \text{SR}^-$ ,  $\text{OH}^-$ ,  $\text{F}^-$ , and  $\text{CF}_3\text{CO}_2^-$ . The energy values in solution are relative to  ${}^{3,5}\text{R} + \text{CH}_4$ .

e) **Table S5.** Relative energies data in the gas phase of B3LYP, B3LYP-G, PBE0 and B3LYP+VDW for methane C-H bond hydroxylation by  $[\text{Fe}^{\text{IV}}=\text{O}(\text{TMC})(\text{L})]^+$  with  $\text{L} = \text{SR}^-$ , and  $\text{OH}^-$ . The gas-phase energies are relative to  ${}^{3,5}\text{RC}$ .

**Table S6-S8.** Spin populations.

f) **Table S6.** Spin populations in solution of the reactants, transition states, and intermediates for (a)  ${}^3\delta$  and  ${}^3\pi$ -pathways; (b)  ${}^5\sigma$  and  ${}^5\pi$ -pathways; for methane hydroxylation by  $[\text{Fe}^{\text{IV}}=\text{O}(\text{TMC})(\text{L})]^+$  with  $\text{L} = \text{SR}^-$ , and  $\text{OH}^-$ .<sup>a</sup>

g) **Table S7.** Spin populations in the gas phase of the reactants, transition states, and intermediates for (a)  ${}^3\delta$  and  ${}^3\pi$ -pathways; (b)  ${}^5\sigma$  and  ${}^5\pi$ -pathways; for methane hydroxylation by  $[\text{Fe}^{\text{IV}}=\text{O}(\text{TMC})(\text{L})]^+$  with  $\text{L} = \text{SR}^-$ , and  $\text{OH}^-$ .<sup>a</sup>

h) **Table S8.** Spin populations in solution of the reactants, transition states, and intermediates for (a)  ${}^3\delta$  and  ${}^3\pi$ -pathways; (b)  ${}^5\sigma$  and  ${}^5\pi$ -pathways; for methane hydroxylation by  $[\text{Fe}^{\text{IV}}=\text{O}(\text{TMC})(\text{L})]^+$  with  $\text{L} = \text{F}^-$ , and  $\text{CF}_3\text{CO}_2^-$ .<sup>a</sup>

**Table S9-S11.** Mulliken charge analysis.

i) **Table S9.** Mulliken charge analysis of the reactants, transition states, and intermediates in solution (a)  ${}^3\delta$  and  ${}^3\pi$ -pathways; (b)  ${}^5\sigma$  and  ${}^5\pi$ -pathways; for methane hydroxylation by  $[\text{Fe}^{\text{IV}}=\text{O}(\text{TMC})(\text{L})]^+$  with  $\text{L} = \text{SR}^-$ , and  $\text{OH}^-$ .<sup>a</sup>

j) **Table S10.** Mulliken charge analysis of the reactants, transition states, and intermediates in solution for (a)  $^3\delta$  and  $^3\pi$ -pathways; (b)  $^5\sigma$  and  $^5\pi$ -pathways; for methane hydroxylation by  $[\text{Fe}^{\text{IV}}=\text{O}(\text{TMC})(\text{L})]^+$  with  $\text{L} = \text{SR}^-$ , and  $\text{OH}^-$ .<sup>a</sup>

k) **Table S11.** Mulliken charge analysis of the reactants, transition states, and intermediates in solution for (a)  $^3\delta$  and  $^3\pi$ -pathways; (b)  $^5\sigma$  and  $^5\pi$ -pathways; for methane hydroxylation by  $[\text{Fe}^{\text{IV}}=\text{O}(\text{TMC})(\text{L})]^+$  with  $\text{L} = \text{F}^-$ , and  $\text{CF}_3\text{CO}_2^-$ .<sup>a</sup>

## Part 2

1. Schematic MO diagrams of  $^5\sigma$ , and  $^{3,5}\pi$ -pathways for the hydrogen-atom abstraction by  $[\text{Fe}^{\text{IV}}=\text{O}(\text{TMC})(\text{OH})]^+$  in solution.

a) **Figure S1.** Schematic MO diagram of  $^3\pi$ -pathway for the hydrogen-atom abstraction by  $[\text{Fe}^{\text{IV}}=\text{O}(\text{TMC})(\text{OH})]^+$  in solution.

b) **Figure S2.** Schematic MO diagram of  $^5\sigma$ -pathway for the hydrogen-atom abstraction by  $[\text{Fe}^{\text{IV}}=\text{O}(\text{TMC})(\text{OH})]^+$  in solution.

c) **Figure S3.** Schematic MO diagram of  $^5\pi$ -pathway for the hydrogen-atom abstraction by  $[\text{Fe}^{\text{IV}}=\text{O}(\text{TMC})(\text{OH})]^+$  in solution.

2. Schematic MO diagrams of  $^5\sigma$ , and  $^{3,5}\pi$ -pathways for the hydrogen-atom abstraction by  $[\text{Fe}^{\text{IV}}=\text{O}(\text{TMC})(\text{SR})]^+$  in solution.

d) **Figure S4.** Schematic MO diagram of  $^3\pi$ -pathway for the hydrogen-atom abstraction by  $[\text{Fe}^{\text{IV}}=\text{O}(\text{TMC})(\text{SR})]^+$  in solution.

e) **Figure S5.** Schematic MO diagram of  $^5\sigma$ -pathway for the hydrogen-atom abstraction by  $[\text{Fe}^{\text{IV}}=\text{O}(\text{TMC})(\text{SR})]^+$  in solution.

f) **Figure S6.** Schematic MO diagram of  $^5\pi$ -pathway for the hydrogen-atom abstraction by  $[\text{Fe}^{\text{IV}}=\text{O}(\text{TMC})(\text{SR})]^+$  in solution.

3. Schematic MO diagrams of  $^{3,5}\sigma$  and  $^{3,5}\pi$ -pathways for the hydrogen-atom abstraction by  $[\text{Fe}^{\text{IV}}=\text{O}(\text{TMC})(\text{F})]^+$  in solution.

g) **Figure S7.** Schematic MO diagram of  $^3\sigma$ -pathway for the hydrogen-atom abstraction by  $[\text{Fe}^{\text{IV}}=\text{O}(\text{TMC})(\text{F})]^+$  in solution.

h) **Figure S8.** Schematic MO diagram of  $^3\pi$ -pathway for the hydrogen-atom abstraction by  $[\text{Fe}^{\text{IV}}=\text{O}(\text{TMC})(\text{F})]^+$  in solution.

i) **Figure S9.** Schematic MO diagram of  $^5\sigma$ -pathway for the hydrogen-atom abstraction by  $[\text{Fe}^{\text{IV}}=\text{O}(\text{TMC})(\text{F})]^+$  in solution.

j) **Figure S10.** Schematic MO diagram of  $^5\pi$ -pathway for the hydrogen-atom abstraction by  $[\text{Fe}^{\text{IV}}=\text{O}(\text{TMC})(\text{F})]^+$  in solution.

4. Schematic MO diagrams of  $^{3,5}\sigma$  and  $^{3,5}\pi$ -pathways for the hydrogen-atom abstraction by  $[\text{Fe}^{\text{IV}}=\text{O}(\text{TMC})(\text{CF}_3\text{CO}_2)]^+$  in solution.

k) **Figure S11.** Schematic MO diagram of  $^3\sigma$ -pathway for the hydrogen-atom abstraction by  $[\text{Fe}^{\text{IV}}=\text{O}(\text{TMC})(\text{CF}_3\text{CO}_2)]^+$  in solution.

- l) **Figure S12.** Schematic MO diagram of  $^3\pi$ -pathway for the hydrogen-atom abstraction by  $[\text{Fe}^{\text{IV}}=\text{O}(\text{TMC})(\text{CF}_3\text{CO}_2)]^+$  in solution.
- m) **Figure S13.** Schematic MO diagram of  $^5\sigma$ -pathway for the hydrogen-atom abstraction by  $[\text{Fe}^{\text{IV}}=\text{O}(\text{TMC})(\text{CF}_3\text{CO}_2)]^+$  in solution.
- n) **Figure S14.** Schematic MO diagram of  $^5\pi$ -pathway for the hydrogen-atom abstraction by  $[\text{Fe}^{\text{IV}}=\text{O}(\text{TMC})(\text{CF}_3\text{CO}_2)]^+$  in solution.
- 5.** Schematic MO diagrams of  $^3\delta$ ,  $^5\sigma$  and  $^{3,5}\pi$ -pathways for the hydrogen-atom abstraction by  $[\text{Fe}^{\text{IV}}=\text{O}(\text{TMC})(\text{SR})]^+$  in the gas phase.
- o) **Figure S15.** Schematic MO diagram of  $^3\delta$ -pathway for the hydrogen-atom abstraction by  $[\text{Fe}^{\text{IV}}=\text{O}(\text{TMC})(\text{SR})]^+$ .
- p) **Figure S16.** Schematic MO diagram of  $^3\pi$ -pathway for the hydrogen-atom abstraction by  $[\text{Fe}^{\text{IV}}=\text{O}(\text{TMC})(\text{SR})]^+$ .
- q) **Figure S17.** Schematic MO diagram of  $^5\sigma$ -pathway for the hydrogen-atom abstraction by  $[\text{Fe}^{\text{IV}}=\text{O}(\text{TMC})(\text{SR})]^+$ .
- r) **Figure S18.** Schematic MO diagram of  $^5\pi$ -pathway for the hydrogen-atom abstraction by  $[\text{Fe}^{\text{IV}}=\text{O}(\text{TMC})(\text{SR})]^+$ .
- 6.** Schematic MO diagrams of  $^3\delta$ ,  $^5\sigma$  and  $^{3,5}\pi$ -pathways for the hydrogen-atom abstraction by  $[\text{Fe}^{\text{IV}}=\text{O}(\text{TMC})(\text{OH})]^+$  in the gas phase.
- s) **Figure S19.** Schematic MO diagram of  $^3\delta$ -pathway for the hydrogen-atom abstraction by  $[\text{Fe}^{\text{IV}}=\text{O}(\text{TMC})(\text{OH})]^+$ .
- t) **Figure S20.** Schematic MO diagram of  $^3\pi$ -pathway for the hydrogen-atom abstraction by  $[\text{Fe}^{\text{IV}}=\text{O}(\text{TMC})(\text{OH})]^+$ .
- u) **Figure S21.** Schematic MO diagram of  $^5\sigma$ -pathway for the hydrogen-atom abstraction by  $[\text{Fe}^{\text{IV}}=\text{O}(\text{TMC})(\text{OH})]^+$ .
- v) **Figure S22.** Schematic MO diagram of  $^5\pi$ -pathway for the hydrogen-atom abstraction by  $[\text{Fe}^{\text{IV}}=\text{O}(\text{TMC})(\text{OH})]^+$ .

### Part 3

All xyz coordinates.

**Table S1.** Energy data in solution for  $[\text{Fe}^{\text{IV}}=\text{O}(\text{TMC})(\text{L})]^+$  with  $\text{L} = \text{SR}^-, \text{OH}^-, \text{F}^-$ , and  $\text{CF}_3\text{CO}_2^-$ .

| solution                              | Point | $\Delta\text{G}$ (au)<br>(B3LYP/B1) | $\Delta\text{G}$ (au)<br>(B3LYP/B2//<br>B3LYP/B1) | $\Delta\text{G}$ (au)<br>(B3LYP/G/B2//<br>B3LYP/B1) | $\Delta\text{G}$ (au)<br>(PBE0/B2//B3LYP/B1) | $\Delta\text{G}$ (au)<br>(B3LYP+VDW/B2//<br>B3LYP/B1) |
|---------------------------------------|-------|-------------------------------------|---------------------------------------------------|-----------------------------------------------------|----------------------------------------------|-------------------------------------------------------|
| $\text{L} = \text{SR}^-$              | S = 1 | -2546.64479                         | -2547.07086                                       | -2547.81611                                         | -2546.34823                                  | -2547.16924                                           |
|                                       | S = 2 | -2546.65076                         | -2547.07423                                       | -2547.81884                                         | -2546.35563                                  | -2547.17583                                           |
| $\text{L} = \text{OH}^-$              | S = 1 | -2185.63216                         | -2186.04722                                       | -2186.73876                                         | -2185.38123                                  | -2186.14063                                           |
|                                       | S = 2 | -2185.63686                         | -2186.04896                                       | -2186.73987                                         | -2185.38737                                  | -2186.14506                                           |
| $\text{L} = \text{F}^-$               | S = 1 | -2209.70416                         | -2210.10738                                       | -2210.79951                                         | -2209.42714                                  | -2210.19825                                           |
|                                       | S = 2 | -2209.70348                         | -2210.10338                                       | -2210.79488                                         | -2209.42752                                  | -2210.19661                                           |
| $\text{L} = \text{CF}_3\text{CO}_2^-$ | S = 1 | -2636.01778                         | -2636.45163                                       | -2637.31753                                         | -2635.52283                                  | -2636.55664                                           |
|                                       | S = 2 | -2636.01807                         | -2636.45035                                       | -2637.31563                                         | -2635.52610                                  | -2636.55770                                           |

  

| solution                              | Point | $\Delta\text{G}$ (kcal/mol)<br>(B3LYP/B1) | $\Delta\text{G}$ (kcal/mol)<br>(B3LYP/B2//<br>B3LYP/B1) | $\Delta\text{G}$ (kcal/mol)<br>(B3LYP/G/B2//<br>B3LYP/B1) | $\Delta\text{G}$ (kcal/mol)<br>(PBE0/B2//B3LYP/B1) | $\Delta\text{G}$ (kcal/mol)<br>(B3LYP+VDW/B2//<br>B3LYP/B1) |
|---------------------------------------|-------|-------------------------------------------|---------------------------------------------------------|-----------------------------------------------------------|----------------------------------------------------|-------------------------------------------------------------|
| $\text{L} = \text{SR}^-$              | S = 1 | 3.7                                       | 2.1                                                     | 1.7                                                       | 4.6                                                | 4.1                                                         |
|                                       | S = 2 | 0.0                                       | 0.0                                                     | 0.0                                                       | 0.0                                                | 0.0                                                         |
| $\text{L} = \text{OH}^-$              | S = 1 | 3.0                                       | 1.1                                                     | 0.7                                                       | 3.9                                                | 2.8                                                         |
|                                       | S = 2 | 0.0                                       | 0.0                                                     | 0.0                                                       | 0.0                                                | 0.0                                                         |
| $\text{L} = \text{F}^-$               | S = 1 | 0.0                                       | 0.0                                                     | 0.0                                                       | 0.2                                                | 0.0                                                         |
|                                       | S = 2 | 0.4                                       | 2.5                                                     | 2.9                                                       | 0.0                                                | 1.0                                                         |
| $\text{L} = \text{CF}_3\text{CO}_2^-$ | S = 1 | 0.2                                       | 0.0                                                     | 0.0                                                       | 2.0                                                | 0.7                                                         |
|                                       | S = 2 | 0.0                                       | 0.8                                                     | 1.2                                                       | 0.0                                                | 0.0                                                         |

**Table S2.** Energy data in gas for  $[\text{Fe}^{\text{IV}}=\text{O}(\text{TMC})(\text{L})]^+$  with  $\text{L} = \text{SR}^-$ , and  $\text{OH}^-$ .

| gas                 | Point | $\Delta\text{G}$ (au)<br>(B3LYP/B1) | $\Delta\text{G}$ (au)<br>(B3LYP/B2//<br>B3LYP/B1) | $\Delta\text{G}$ (au)<br>(B3LYP/G/B2//<br>B3LYP/B1) | $\Delta\text{G}$ (au)<br>(PBE0/B2//B3LYP/B1) | $\Delta\text{G}$ (au)<br>(B3LYP+VDW/B2//<br>B3LYP/B1) |
|---------------------|-------|-------------------------------------|---------------------------------------------------|-----------------------------------------------------|----------------------------------------------|-------------------------------------------------------|
| L = SR <sup>-</sup> | S = 1 | -2546.57403                         | -2547.07117                                       | -2547.81642                                         | -2546.34856                                  | -2547.16963                                           |
|                     | S = 2 | -2546.57914                         | -2547.07441                                       | -2547.81901                                         | -2546.35568                                  | -2547.17609                                           |
| L = OH <sup>-</sup> | S = 1 | -2185.56137                         | -2186.04763                                       | -2186.73916                                         | -2185.38143                                  | -2186.14108                                           |
|                     | S = 2 | -2185.56804                         | -2186.04938                                       | -2186.74028                                         | -2185.38749                                  | -2186.14542                                           |

| gas                 | Point | $\Delta\text{G}$ (kcal/mol)<br>(B3LYP/B1) | $\Delta\text{G}$ (kcal/mol)<br>(B3LYP/B2//<br>B3LYP/B1) | $\Delta\text{G}$ (kcal/mol)<br>(B3LYP/G/B2//<br>B3LYP/B1) | $\Delta\text{G}$ (kcal/mol)<br>(PBE0/B2//B3LYP/B1) | $\Delta\text{G}$ (kcal/mol)<br>(B3LYP+VDW/B2//<br>B3LYP/B1) |
|---------------------|-------|-------------------------------------------|---------------------------------------------------------|-----------------------------------------------------------|----------------------------------------------------|-------------------------------------------------------------|
| L = SR <sup>-</sup> | S = 1 | 3.2                                       | 2.0                                                     | 1.6                                                       | 4.5                                                | 4.1                                                         |
|                     | S = 2 | 0.0                                       | 0.0                                                     | 0.0                                                       | 0.0                                                | 0.0                                                         |
| L = OH <sup>-</sup> | S = 1 | 4.2                                       | 1.1                                                     | 0.7                                                       | 3.8                                                | 2.7                                                         |
|                     | S = 2 | 0.0                                       | 0.0                                                     | 0.0                                                       | 0.0                                                | 0.0                                                         |

**Table S3.** Energies data in solution for  $[\text{Fe}^{\text{IV}}=\text{O}(\text{TMC})(\text{SR})]^+$ . (a) B3LYP/B1, B3LYP-G/B1, B3LYP+VDW/B1 and PBE0/B1; (b) B3LYP/B2//B1, B3LYP-G/B2//B1, B3LYP+VDW/B2//B1 and PBE0/B2//B1.

(a)

| B1         | Point | $\Delta G$ (au)<br>(B3LYP) | $\Delta G$ (au)<br>(B3LYP-G) | $\Delta G$ (au)<br>(B3LYP+VDW) | $\Delta G$ (au)<br>(PBE0) |
|------------|-------|----------------------------|------------------------------|--------------------------------|---------------------------|
| $\Delta G$ | S = 1 | -2546.644791               | -2547.389721                 | -2546.741274                   | -2545.925074              |
| (au)       | S = 2 | -2546.650761               | -2547.394991                 | -2546.750265                   | -2545.934548              |
| $\Delta G$ | S = 1 | 3.7                        | 3.3                          | 5.6                            | 5.9                       |
| (kcal/mol) | S = 2 | 0.0                        | 0.0                          | 0.0                            | 0.0                       |

(b)

| B2         | Point | $\Delta G$ (kcal/mol)<br>(B3LYP) | $\Delta G$ (kcal/mol)<br>(B3LYP-G) | $\Delta G$ (kcal/mol)<br>(B3LYP+VDW) | $\Delta G$ (kcal/mol)<br>(PBE0) |
|------------|-------|----------------------------------|------------------------------------|--------------------------------------|---------------------------------|
| $\Delta G$ | S = 1 | -2547.070864                     | -2547.816144                       | -2547.169728                         | -2546.352464                    |
| (au)       | S = 2 | -2547.074229                     | -2547.818868                       | -2547.176494                         | -2546.359232                    |
| $\Delta G$ | S = 1 | 2.1                              | 1.7                                | 4.2                                  | 4.2                             |
| (kcal/mol) | S = 2 | 0.0                              | 0.0                                | 0.0                                  | 0.0                             |

**Table S4.** Relative energies data in solution of B3LYP, B3LYP-G, PBE0 and B3LYP+VDW for methane C–H bond hydroxylation by  $[\text{Fe}^{\text{IV}}=\text{O}(\text{TMC})(\text{L})]^+$  with  $\text{L} = \text{SR}^-, \text{OH}^-, \text{F}^-$ , and  $\text{CF}_3\text{CO}_2^-$ . The energy values in solution are relative to  ${}^{3,5}\text{R} + \text{CH}_4$ .

| solution                                          | Point                                             | $\Delta\text{G}$ (kcal/mol)<br>(B3LYP/B1)         | $\Delta\text{G}$ (kcal/mol)<br>(B3LYP/B2//<br>B3LYP/B1) | $\Delta\text{G}$ (kcal/mol)<br>(B3LYP/G/B2//<br>B3LYP/B1) | $\Delta\text{G}$ (kcal/mol)<br>(PBE0/B2//B3LYP/B1) | $\Delta\text{G}$ (kcal/mol)<br>(B3LYP+VDW/B2//<br>B3LYP/B1) |      |
|---------------------------------------------------|---------------------------------------------------|---------------------------------------------------|---------------------------------------------------------|-----------------------------------------------------------|----------------------------------------------------|-------------------------------------------------------------|------|
| L = SR <sup>-</sup>                               | <sup>3<math>\delta</math></sup> R+CH <sub>4</sub> | 3.7                                               | 2.1                                                     | 1.7                                                       | 4.6                                                | 4.1                                                         |      |
|                                                   | <sup>3<math>\delta</math></sup> TS                | 45.2                                              | 35.7                                                    | 35.6                                                      | 32.9                                               | 30.5                                                        |      |
|                                                   | <sup>3<math>\delta</math></sup> I                 | 33.4                                              | 22.4                                                    | 22.4                                                      | 19.2                                               | 19.0                                                        |      |
|                                                   | <sup>3<math>\pi</math></sup> R+CH <sub>4</sub>    | 3.7                                               | 2.1                                                     | 1.7                                                       | 4.6                                                | 4.1                                                         |      |
|                                                   | <sup>3<math>\pi</math></sup> TS                   | 46.2                                              | 35.4                                                    | 34.9                                                      | 34.6                                               | 32.2                                                        |      |
|                                                   | <sup>3<math>\pi</math></sup> I                    | 35.2                                              | 22.9                                                    | 22.5                                                      | 22.1                                               | 21.6                                                        |      |
|                                                   | <sup>5<math>\sigma</math></sup> R+CH <sub>4</sub> | 0.0                                               | 0.0                                                     | 0.0                                                       | 0.0                                                | 0.0                                                         |      |
|                                                   | <sup>5<math>\sigma</math></sup> TS                | 34.3                                              | 28.6                                                    | 28.8                                                      | 23.4                                               | 24.4                                                        |      |
|                                                   | <sup>5<math>\sigma</math></sup> I                 | 28.1                                              | 20.9                                                    | 21.3                                                      | 15.1                                               | 17.9                                                        |      |
|                                                   | <sup>5<math>\pi</math></sup> R+CH <sub>4</sub>    | 0.0                                               | 0.0                                                     | 0.0                                                       | 0.0                                                | 0.0                                                         |      |
|                                                   | <sup>5<math>\pi</math></sup> TS                   | 42.2                                              | 33.2                                                    | 33.1                                                      | 30.2                                               | 27.8                                                        |      |
|                                                   | <sup>5<math>\pi</math></sup> I                    | 30.3                                              | 20.8                                                    | 20.8                                                      | 17.7                                               | 17.3                                                        |      |
|                                                   | L = OH <sup>-</sup>                               | <sup>3<math>\delta</math></sup> R+CH <sub>4</sub> | 3.0                                                     | 1.1                                                       | 0.7                                                | 3.9                                                         | 2.8  |
|                                                   |                                                   | <sup>3<math>\delta</math></sup> TS                | 45.1                                                    | 35.1                                                      | 34.9                                               | 32.1                                                        | 29.9 |
|                                                   |                                                   | <sup>3<math>\delta</math></sup> I                 | 31.8                                                    | 20.5                                                      | 20.5                                               | 17.1                                                        | 17.0 |
| <sup>3<math>\pi</math></sup> R+CH <sub>4</sub>    |                                                   | 3.0                                               | 1.1                                                     | 0.7                                                       | 3.9                                                | 2.8                                                         |      |
| <sup>3<math>\pi</math></sup> TS                   |                                                   | 46.3                                              | 34.8                                                    | 34.4                                                      | 34.5                                               | 31.4                                                        |      |
| <sup>3<math>\pi</math></sup> I                    |                                                   | 34.4                                              | 22.6                                                    | 22.2                                                      | 22.4                                               | 21.1                                                        |      |
| <sup>5<math>\sigma</math></sup> R+CH <sub>4</sub> |                                                   | 0.0                                               | 0.0                                                     | 0.0                                                       | 0.0                                                | 0.0                                                         |      |
| <sup>5<math>\sigma</math></sup> TS                |                                                   | 33.4                                              | 27.2                                                    | 27.4                                                      | 21.7                                               | 23.1                                                        |      |
| <sup>5<math>\sigma</math></sup> I                 |                                                   | 27.3                                              | 19.3                                                    | 19.7                                                      | 13.2                                               | 16.4                                                        |      |
| <sup>5<math>\pi</math></sup> R+CH <sub>4</sub>    |                                                   | 0.0                                               | 0.0                                                     | 0.0                                                       | 0.0                                                | 0.0                                                         |      |
| <sup>5<math>\pi</math></sup> TS                   |                                                   | 44.9                                              | 35.6                                                    | 35.5                                                      | 32.9                                               | 30.3                                                        |      |
| <sup>5<math>\pi</math></sup> I                    |                                                   | 30.4                                              | 20.5                                                    | 20.5                                                      | 17.3                                               | 17.1                                                        |      |
| L = F <sup>-</sup>                                |                                                   | <sup>3<math>\sigma</math></sup> R+CH <sub>4</sub> | 0.0                                                     | 0.0                                                       | 0.0                                                | 0.2                                                         | 0.0  |
|                                                   |                                                   | <sup>3<math>\sigma</math></sup> TS                | 44.3                                                    | 39.2                                                      | 39.4                                               | 34.8                                                        | 35.4 |



|                                                     |                                   |      |      |      |      |      |
|-----------------------------------------------------|-----------------------------------|------|------|------|------|------|
|                                                     | $3\sigma\mathbf{I}$               | 34.2 | 24.5 | 24.9 | 18.4 | 19.3 |
|                                                     | $3\pi\mathbf{R}+\mathbf{CH}_4$    | 0.0  | 0.0  | 0.0  | 0.2  | 0.0  |
|                                                     | $3\pi\mathbf{TS}$                 | 44.4 | 35.8 | 35.8 | 32.8 | 30.6 |
|                                                     | $3\pi\mathbf{I}$                  | 34.0 | 24.7 | 24.7 | 21.8 | 21.3 |
|                                                     | $5\sigma\mathbf{R}+\mathbf{CH}_4$ | 0.4  | 2.5  | 2.9  | 0.0  | 1.0  |
|                                                     | $5\sigma\mathbf{TS}$              | 32.3 | 28.7 | 29.3 | 20.6 | 23.3 |
|                                                     | $5\sigma\mathbf{I}$               | 26.6 | 21.4 | 22.2 | 12.5 | 17.1 |
|                                                     | $5\pi\mathbf{R}+\mathbf{CH}_4$    | 0.4  | 2.5  | 2.9  | 0.0  | 1.0  |
|                                                     | $5\pi\mathbf{TS}$                 | 46.3 | 40.0 | 40.3 | 34.5 | 33.0 |
|                                                     | $5\pi\mathbf{I}$                  | 32.7 | 24.3 | 24.6 | 18.2 | 19.1 |
| L =<br>CF <sub>3</sub> CO <sub>2</sub> <sup>-</sup> | $3\sigma\mathbf{R}+\mathbf{CH}_4$ | 0.2  | 0.0  | 0.0  | 2.0  | 0.7  |
|                                                     | $3\sigma\mathbf{TS}$              | 40.0 | 36.9 | 37.1 | 34.2 | 29.9 |
|                                                     | $3\sigma\mathbf{I}$               | 36.6 | 31.4 | 31.8 | 28.1 | 25.5 |
|                                                     | $3\pi\mathbf{R}+\mathbf{CH}_4$    | 0.2  | 0.0  | 0.0  | 2.0  | 0.7  |
|                                                     | $3\pi\mathbf{TS}$                 | 45.3 | 36.5 | 36.5 | 35.1 | 31.6 |
|                                                     | $3\pi\mathbf{I}$                  | 35.4 | 24.5 | 24.5 | 23.1 | 21.3 |
|                                                     | $5\sigma\mathbf{R}+\mathbf{CH}_4$ | 0.0  | 0.8  | 1.2  | 0.0  | 0.0  |
|                                                     | $5\sigma\mathbf{TS}$              | 29.6 | 25.9 | 26.5 | 19.6 | 20.8 |
|                                                     | $5\sigma\mathbf{I}$               | 25.5 | 18.6 | 19.4 | 11.4 | 14.3 |
|                                                     | $5\pi\mathbf{R}+\mathbf{CH}_4$    | 0.0  | 0.8  | 1.2  | 0.0  | 0.0  |
|                                                     | $5\pi\mathbf{TS}$                 | 45.5 | 38.8 | 39.1 | 35.3 | 32.2 |
|                                                     | $5\pi\mathbf{I}$                  | 35.7 | 26.8 | 27.2 | 22.7 | 21.9 |

**Table S5.** Relative energies data in the gas phase of B3LYP, B3LYP-G, PBE0 and B3LYP+VDW for methane C-H bond hydroxylation by  $[\text{Fe}^{\text{IV}}=\text{O}(\text{TMC})(\text{L})]^+$  with  $\text{L} = \text{SR}^-$ , and  $\text{OH}^-$ . The gas-phase energies are relative to  ${}^{3,5}\text{RC}$ .

| gas                 | Point                           | $\Delta\text{G}$ (kcal/mol)<br>(B3LYP/B1) | $\Delta\text{G}$ (kcal/mol)<br>(B3LYP/B2//<br>B3LYP/B1) | $\Delta\text{G}$ (kcal/mol)<br>(PBE0/B2//B3LYP/B1) | $\Delta\text{G}$ (kcal/mol)<br>(B3LYP+VDW/B2//<br>B3LYP/B1) |
|---------------------|---------------------------------|-------------------------------------------|---------------------------------------------------------|----------------------------------------------------|-------------------------------------------------------------|
| L = SR <sup>-</sup> | <sup>3δ</sup> R+CH <sub>4</sub> | -4.8                                      | 2.2                                                     | 5.1                                                | 5.8                                                         |
|                     | <sup>3δ</sup> RC                | 5.1                                       | 2.4                                                     | 5.1                                                | 5.2                                                         |
|                     | <sup>3δ</sup> TS                | 32.1                                      | 35.8                                                    | 33.6                                               | 32.3                                                        |
|                     | <sup>3δ</sup> I                 | 19.3                                      | 21.0                                                    | 18.4                                               | 19.1                                                        |
|                     | <sup>3π</sup> R+CH <sub>4</sub> | -4.8                                      | 2.2                                                     | 5.1                                                | 5.8                                                         |
|                     | <sup>3π</sup> RC                | 4.8                                       | 2.1                                                     | 4.5                                                | 4.3                                                         |
|                     | <sup>3π</sup> TS                | 34.6                                      | 35.4                                                    | 35.1                                               | 33.8                                                        |
|                     | <sup>3π</sup> I                 | 23.7                                      | 22.9                                                    | 22.4                                               | 23.0                                                        |
|                     | <sup>5σ</sup> R+CH <sub>4</sub> | -8.0                                      | 0.2                                                     | 0.7                                                | 1.7                                                         |
|                     | <sup>5σ</sup> RC                | 0.2                                       | 0.2                                                     | 0.4                                                | 0.9                                                         |
|                     | <sup>5σ</sup> TS                | 22.8                                      | 28.6                                                    | 23.9                                               | 26.0                                                        |
|                     | <sup>5σ</sup> I                 | 16.7                                      | 21.0                                                    | 15.8                                               | 19.7                                                        |
|                     | <sup>5π</sup> R+CH <sub>4</sub> | -8.0                                      | 0.2                                                     | 0.7                                                | 1.7                                                         |
|                     | <sup>5π</sup> RC                | 0.0                                       | 0.0                                                     | 0.0                                                | 0.0                                                         |
|                     | <sup>5π</sup> TS                | 29.7                                      | 33.3                                                    | 30.9                                               | 29.5                                                        |
|                     | <sup>5π</sup> I                 | 18.7                                      | 20.8                                                    | 18.2                                               | 18.9                                                        |
| L = OH <sup>-</sup> | <sup>3δ</sup> R+CH <sub>4</sub> | -5.5                                      | 1.4                                                     | 4.6                                                | 4.8                                                         |
|                     | <sup>3δ</sup> RC                | 3.7                                       | 0.3                                                     | 2.9                                                | 2.0                                                         |
|                     | <sup>3δ</sup> TS                | 33.3                                      | 35.4                                                    | 32.9                                               | 32.0                                                        |
|                     | <sup>3δ</sup> I                 | 19.1                                      | 20.7                                                    | 17.8                                               | 19.0                                                        |
|                     | <sup>3π</sup> R+CH <sub>4</sub> | -5.5                                      | 1.4                                                     | 4.6                                                | 4.8                                                         |
|                     | <sup>3π</sup> RC                | 5.1                                       | 0.3                                                     | 2.8                                                | 2.0                                                         |
|                     | <sup>3π</sup> TS                | 34.9                                      | 35.2                                                    | 35.4                                               | 33.6                                                        |
|                     | <sup>3π</sup> I                 | 23.9                                      | 22.8                                                    | 22.9                                               | 23.0                                                        |
|                     | <sup>5σ</sup> R+CH <sub>4</sub> | -9.7                                      | 0.3                                                     | 0.8                                                | 2.1                                                         |
|                     | <sup>5σ</sup> RC                | 1.1                                       | 0.3                                                     | 0.3                                                | 0.7                                                         |
|                     | <sup>5σ</sup> TS                | 20.8                                      | 27.2                                                    | 22.4                                               | 24.9                                                        |
|                     | <sup>5σ</sup> I                 | 14.9                                      | 19.3                                                    | 13.7                                               | 18.2                                                        |

---

|                                   |      |      |      |      |
|-----------------------------------|------|------|------|------|
| ${}^5\pi\mathbf{R}+\mathbf{CH}_4$ | -9.7 | 0.3  | 0.8  | 2.1  |
| ${}^5\pi\mathbf{RC}$              | 0.0  | 0.0  | 0.0  | 0.0  |
| ${}^5\pi\mathbf{TS}$              | 32.9 | 36.0 | 33.8 | 32.5 |
| ${}^5\pi\mathbf{I}$               | 19.3 | 20.8 | 18.0 | 19.0 |

---

**Table S6.** Spin populations in solution of the reactants, transition states, and intermediates for (a)  $^3\delta$  and  $^3\pi$ -pathways; (b)  $^5\sigma$  and  $^5\pi$ -pathways; for methane hydroxylation by  $[\text{Fe}^{\text{IV}}=\text{O}(\text{TMC})(\text{L})]^+$  with  $\text{L} = \text{SR}^-$ , and  $\text{OH}^-$ .<sup>a</sup>

| solution            |                       | Fe         |         | O          |         | CH <sub>3</sub> |         | H <sup>b</sup> |         |
|---------------------|-----------------------|------------|---------|------------|---------|-----------------|---------|----------------|---------|
|                     |                       | 3 $\delta$ | 3 $\pi$ | 3 $\delta$ | 3 $\pi$ | 3 $\delta$      | 3 $\pi$ | 3 $\delta$     | 3 $\pi$ |
| L = SR <sup>-</sup> | <b>R</b>              | 2.25       | 2.25    | 0.45       | 0.45    | 0.00            | 0.00    | 0.00           | 0.00    |
|                     | <b>TS<sub>H</sub></b> | 2.28       | 1.18    | 0.15       | 0.57    | -0.35           | 0.42    | 0.03           | -0.05   |
|                     | <b>I</b>              | 2.89       | 0.96    | 0.06       | 0.07    | -0.98           | 0.98    | 0.00           | 0.00    |
| L = OH <sup>-</sup> | <b>R</b>              | 1.49       | 1.49    | 0.66       | 0.66    | 0.00            | 0.00    | 0.00           | 0.00    |
|                     | <b>TS<sub>H</sub></b> | 2.20       | 1.08    | 0.18       | 0.46    | -0.30           | 0.57    | 0.03           | -0.05   |
|                     | <b>I</b>              | 2.81       | 0.97    | 0.03       | 0.06    | -0.98           | 0.98    | 0.00           | 0.00    |

  

| solution            |                       | Fe         |         | O          |         | CH <sub>3</sub> |         | H <sup>b</sup> |         |
|---------------------|-----------------------|------------|---------|------------|---------|-----------------|---------|----------------|---------|
|                     |                       | 5 $\sigma$ | 5 $\pi$ | 5 $\sigma$ | 5 $\pi$ | 5 $\sigma$      | 5 $\pi$ | 5 $\sigma$     | 5 $\pi$ |
| L = SR <sup>-</sup> | <b>R</b>              | 2.97       | 2.97    | 0.56       | 0.56    | 0.00            | 0.00    | 0.00           | 0.00    |
|                     | <b>TS<sub>H</sub></b> | 3.91       | 2.97    | 0.08       | 0.40    | -0.56           | 0.53    | 0.03           | -0.04   |
|                     | <b>I</b>              | 4.08       | 2.90    | 0.23       | 0.03    | -0.97           | 0.98    | 0.00           | 0.00    |
| L = OH <sup>-</sup> | <b>R</b>              | 3.19       | 3.19    | 0.56       | 0.56    | 0.00            | 0.00    | 0.00           | 0.00    |
|                     | <b>TS<sub>H</sub></b> | 3.97       | 2.91    | 0.02       | 0.38    | -0.53           | 0.53    | 0.04           | -0.05   |
|                     | <b>I</b>              | 4.17       | 2.82    | 0.20       | 0.04    | -0.98           | 0.99    | 0.01           | 0.01    |

<sup>a</sup> Values from Mulliken population analysis. <sup>b</sup> The transferred hydrogen.

**Table S7.** Spin populations in the gas phase of the reactants, transition states, and intermediates for (a)  $^3\delta$  and  $^3\pi$ -pathways; (b)  $^5\sigma$  and  $^5\pi$ -pathways; for methane hydroxylation by  $[\text{Fe}^{\text{IV}}=\text{O}(\text{TMC})(\text{L})]^+$  with  $\text{L} = \text{SR}^-$ , and  $\text{OH}^-$ .<sup>a</sup>

| (a)                 |                       | Fe         |         | O          |         | CH <sub>3</sub> |         | H <sup>b</sup> |         |
|---------------------|-----------------------|------------|---------|------------|---------|-----------------|---------|----------------|---------|
|                     |                       | 3 $\delta$ | 3 $\pi$ | 3 $\delta$ | 3 $\pi$ | 3 $\delta$      | 3 $\pi$ | 3 $\delta$     | 3 $\pi$ |
| L = SR <sup>-</sup> | <b>R</b>              | 1.35       | 1.35    | 0.73       | 0.73    | 0.00            | 0.00    | 0.00           | 0.00    |
|                     | <b>RC</b>             | 1.35       | 1.35    | 0.73       | 0.73    | 0.00            | 0.00    | 0.00           | 0.00    |
|                     | <b>TS<sub>H</sub></b> | 2.82       | 1.03    | -0.31      | 0.46    | -0.50           | 0.57    | 0.03           | -0.04   |
|                     | <b>I</b>              | 2.90       | 0.93    | 0.02       | 0.07    | -0.98           | 0.98    | -0.01          | 0.00    |
| L = OH <sup>-</sup> | <b>R</b>              | 1.37       | 1.37    | 0.69       | 0.69    | 0.00            | 0.00    | 0.00           | 0.00    |
|                     | <b>RC</b>             | 1.37       | 1.37    | 0.69       | 0.69    | 0.00            | 0.00    | 0.00           | 0.00    |
|                     | <b>TS<sub>H</sub></b> | 2.74       | 1.02    | -0.39      | 0.45    | -0.51           | 0.58    | 0.03           | -0.04   |
|                     | <b>I</b>              | 2.80       | 0.95    | 0.04       | 0.06    | -0.97           | 0.98    | 0.00           | 0.00    |

  

| (b)                 |                       | Fe         |         | O          |         | CH <sub>3</sub> |         | H <sup>b</sup> |         |
|---------------------|-----------------------|------------|---------|------------|---------|-----------------|---------|----------------|---------|
|                     |                       | 5 $\sigma$ | 5 $\pi$ | 5 $\sigma$ | 5 $\pi$ | 5 $\sigma$      | 5 $\pi$ | 5 $\sigma$     | 5 $\pi$ |
| L = SR <sup>-</sup> | <b>R</b>              | 3.15       | 3.15    | 0.67       | 0.67    | 0.00            | 0.00    | 0.00           | 0.00    |
|                     | <b>RC</b>             | 3.19       | 3.19    | 0.64       | 0.64    | 0.00            | 0.00    | 0.00           | 0.00    |
|                     | <b>TS<sub>H</sub></b> | 3.91       | 2.98    | 0.06       | 0.40    | -0.56           | 0.56    | 0.02           | -0.03   |
|                     | <b>I</b>              | 4.06       | 2.90    | 0.21       | 0.03    | -0.97           | 0.97    | 0.00           | 0.01    |
| L = OH <sup>-</sup> | <b>R</b>              | 3.17       | 3.17    | 0.56       | 0.56    | 0.00            | 0.00    | 0.00           | 0.00    |
|                     | <b>RC</b>             | 3.18       | 3.18    | 0.55       | 0.55    | 0.00            | 0.00    | 0.00           | 0.00    |
|                     | <b>TS<sub>H</sub></b> | 3.99       | 2.91    | 0.02       | 0.36    | -0.57           | 0.58    | 0.03           | -0.03   |
|                     | <b>I</b>              | 4.16       | 2.81    | 0.19       | 0.04    | -0.97           | 0.97    | 0.00           | 0.02    |

<sup>a</sup> Values from Mulliken population analysis. <sup>b</sup> The transferred hydrogen.

**Table S8.** Spin populations in solution of the reactants, transition states, and intermediates for (a)  $^3\delta$  and  $^3\pi$ -pathways; (b)  $^5\sigma$  and  $^5\pi$ -pathways; for methane hydroxylation by  $[\text{Fe}^{\text{IV}}=\text{O}(\text{TMC})(\text{L})]^+$  with  $\text{L} = \text{F}^-$ , and  $\text{CF}_3\text{CO}_2^-$ .<sup>a</sup>

| (a)                                   |                       | Fe        |        | O         |        | $\text{CH}_3$ |        | $\text{H}^{\text{b}}$ |        |
|---------------------------------------|-----------------------|-----------|--------|-----------|--------|---------------|--------|-----------------------|--------|
| solution                              |                       | $3\sigma$ | $3\pi$ | $3\sigma$ | $3\pi$ | $3\sigma$     | $3\pi$ | $3\sigma$             | $3\pi$ |
| $\text{L} = \text{F}^-$               | <b>R</b>              | 1.52      | 1.52   | 0.66      | 0.66   | 0.00          | 0.00   | 0.00                  | 0.00   |
|                                       | <b>TS<sub>H</sub></b> | 2.69      | 1.11   | 0.07      | 0.46   | -0.70         | 0.58   | 0.05                  | -0.05  |
|                                       | <b>I</b>              | 2.82      | 1.01   | 0.05      | 0.07   | -0.98         | 0.98   | 0.00                  | 0.00   |
| $\text{L} = \text{CF}_3\text{CO}_2^-$ | <b>R</b>              | 1.51      | 1.51   | 0.70      | 0.70   | 0.00          | 0.00   | 0.00                  | 0.00   |
|                                       | <b>TS<sub>H</sub></b> | 2.71      | 1.09   | 0.08      | 0.45   | -0.63         | 0.59   | 0.04                  | -0.04  |
|                                       | <b>I</b>              | 2.95      | 1.03   | 0.23      | 0.08   | -0.97         | 0.98   | 0.01                  | 0.00   |
| (b)                                   |                       | Fe        |        | O         |        | $\text{CH}_3$ |        | $\text{H}^{\text{b}}$ |        |
| solution                              |                       | $5\sigma$ | $5\pi$ | $5\sigma$ | $5\pi$ | $5\sigma$     | $5\pi$ | $5\sigma$             | $5\pi$ |
| $\text{L} = \text{F}^-$               | <b>R</b>              | 3.19      | 3.19   | 0.53      | 0.53   | 0.00          | 0.00   | 0.00                  | 0.00   |
|                                       | <b>TS<sub>H</sub></b> | 3.99      | 2.91   | 0.05      | 0.36   | -0.53         | 0.55   | 0.03                  | -0.04  |
|                                       | <b>I</b>              | 4.20      | 2.82   | 0.23      | 0.05   | -0.97         | 0.98   | 0.00                  | 0.01   |
| $\text{L} = \text{CF}_3\text{CO}_2^-$ | <b>R</b>              | 3.16      | 3.16   | 0.57      | 0.57   | 0.00          | 0.00   | 0.00                  | 0.00   |
|                                       | <b>TS<sub>H</sub></b> | 4.02      | 2.96   | 0.11      | 0.34   | -0.57         | 0.51   | 0.02                  | -0.02  |
|                                       | <b>I</b>              | 4.17      | 2.87   | 0.29      | 0.02   | -0.96         | 0.97   | 0.00                  | 0.01   |

<sup>a</sup> Values from Mulliken population analysis. <sup>b</sup> The transferred hydrogen.

**Table S9.** Mulliken charge analysis of the reactants, transition states, and intermediates in solution for (a)  $^3\delta$  and  $^3\pi$ -pathways; (b)  $^5\sigma$  and  $^5\pi$ -pathways; for methane hydroxylation by  $[\text{Fe}^{\text{IV}}=\text{O}(\text{TMC})(\text{L})]^+$  with  $\text{L} = \text{SR}^-$ , and  $\text{OH}^-$ .<sup>a</sup>

| (a)                      |                       | Fe        |        | O         |        | $\text{CH}_3$ |        | $\text{H}^b$ |        |
|--------------------------|-----------------------|-----------|--------|-----------|--------|---------------|--------|--------------|--------|
| solution                 |                       | $3\delta$ | $3\pi$ | $3\delta$ | $3\pi$ | $3\delta$     | $3\pi$ | $3\delta$    | $3\pi$ |
| $\text{L} = \text{SR}^-$ | <b>R</b>              | 0.51      | 0.51   | -0.66     | -0.66  | -0.13         | -0.13  | 0.13         | 0.13   |
|                          | <b>TS<sub>H</sub></b> | 0.51      | 0.58   | -0.67     | -0.63  | -0.26         | -0.08  | 0.31         | 0.24   |
|                          | <b>I</b>              | 0.65      | 0.45   | -0.71     | -0.71  | 0.02          | 0.01   | 0.28         | 0.27   |
| $\text{L} = \text{OH}^-$ | <b>R</b>              | 0.80      | 0.80   | -0.60     | -0.60  | -0.13         | -0.13  | 0.13         | 0.13   |
|                          | <b>TS<sub>H</sub></b> | 0.63      | 0.78   | -0.67     | -0.68  | -0.36         | -0.12  | 0.34         | 0.30   |
|                          | <b>I</b>              | 0.85      | 0.59   | -0.70     | -0.71  | 0.02          | 0.01   | 0.28         | 0.27   |

  

| (b)                      |                       | Fe        |        | O         |        | $\text{CH}_3$ |        | $\text{H}^b$ |        |
|--------------------------|-----------------------|-----------|--------|-----------|--------|---------------|--------|--------------|--------|
| solution                 |                       | $5\sigma$ | $5\pi$ | $5\sigma$ | $5\pi$ | $5\sigma$     | $5\pi$ | $5\sigma$    | $5\pi$ |
| $\text{L} = \text{SR}^-$ | <b>R</b>              | 0.56      | 0.56   | -0.58     | -0.58  | -0.13         | -0.13  | 0.13         | 0.13   |
|                          | <b>TS<sub>H</sub></b> | 0.84      | 0.56   | -0.68     | -0.67  | -0.06         | -0.10  | 0.27         | 0.27   |
|                          | <b>I</b>              | 0.89      | 0.69   | -0.76     | -0.71  | 0.01          | 0.01   | 0.28         | 0.27   |
| $\text{L} = \text{OH}^-$ | <b>R</b>              | 0.90      | 0.90   | -0.57     | -0.57  | -0.13         | -0.13  | 0.13         | 0.13   |
|                          | <b>TS<sub>H</sub></b> | 0.98      | 0.69   | -0.66     | -0.66  | -0.08         | -0.11  | 0.27         | 0.28   |
|                          | <b>I</b>              | 1.03      | 0.84   | -0.74     | -0.68  | 0.01          | 0.01   | 0.28         | 0.29   |

<sup>a</sup> Values from Mulliken population analysis. <sup>b</sup> The transferred hydrogen.

**Table S10.** Mulliken charge analysis of the reactants, transition states, and intermediates in the gas phase for (a)  $^3\delta$  and  $^3\pi$ -pathways; (b)  $^5\sigma$  and  $^5\pi$ -pathways; for methane hydroxylation by  $[\text{Fe}^{\text{IV}}=\text{O}(\text{TMC})(\text{L})]^+$  with  $\text{L} = \text{SR}^-$ , and  $\text{OH}^-$ .<sup>a</sup>

| gas                 |                       | Fe        |        | O         |        | CH <sub>3</sub> |        | H <sup>b</sup> |        |
|---------------------|-----------------------|-----------|--------|-----------|--------|-----------------|--------|----------------|--------|
|                     |                       | $3\delta$ | $3\pi$ | $3\delta$ | $3\pi$ | $3\delta$       | $3\pi$ | $3\delta$      | $3\pi$ |
| L = SR <sup>-</sup> | <b>R</b>              | 0.38      | 0.38   | -0.55     | -0.55  | -0.12           | -0.12  | 0.12           | 0.12   |
|                     | <b>RC</b>             | 0.41      | 0.40   | -0.56     | -0.56  | -0.13           | -0.12  | 0.12           | 0.11   |
|                     | <b>TS<sub>H</sub></b> | 0.66      | 0.44   | -0.70     | -0.69  | 0.00            | -0.05  | 0.23           | 0.25   |
|                     | <b>I</b>              | 0.66      | 0.41   | -0.71     | -0.71  | 0.02            | 0.02   | 0.27           | 0.26   |
| L = OH <sup>-</sup> | <b>R</b>              | 0.59      | 0.59   | -0.56     | -0.56  | -0.12           | -0.12  | 0.12           | 0.12   |
|                     | <b>RC</b>             | 0.60      | 0.60   | -0.58     | -0.58  | -0.13           | -0.12  | 0.12           | 0.11   |
|                     | <b>TS<sub>H</sub></b> | 0.84      | 0.57   | -0.67     | -0.69  | -0.01           | -0.07  | 0.25           | 0.27   |
|                     | <b>I</b>              | 0.85      | 0.57   | -0.69     | -0.70  | 0.03            | 0.02   | 0.28           | 0.26   |

  

| gas                 |                       | Fe        |        | O         |        | CH <sub>3</sub> |        | H <sup>b</sup> |        |
|---------------------|-----------------------|-----------|--------|-----------|--------|-----------------|--------|----------------|--------|
|                     |                       | $5\sigma$ | $5\pi$ | $5\sigma$ | $5\pi$ | $5\sigma$       | $5\pi$ | $5\sigma$      | $5\pi$ |
| L = SR <sup>-</sup> | <b>R</b>              | 0.46      | 0.46   | -0.40     | -0.40  | -0.12           | -0.12  | 0.12           | 0.12   |
|                     | <b>RC</b>             | 0.67      | 0.66   | -0.55     | -0.55  | -0.12           | -0.12  | 0.12           | 0.12   |
|                     | <b>TS<sub>H</sub></b> | 0.80      | 0.68   | -0.69     | -0.68  | -0.03           | -0.04  | 0.25           | 0.25   |
|                     | <b>I</b>              | 0.84      | 0.66   | -0.78     | -0.71  | 0.02            | 0.02   | 0.28           | 0.27   |
| L = OH <sup>-</sup> | <b>R</b>              | 0.85      | 0.85   | -0.54     | -0.54  | -0.12           | -0.12  | 0.12           | 0.12   |
|                     | <b>RC</b>             | 0.88      | 0.88   | -0.55     | -0.56  | -0.12           | -0.12  | 0.11           | 0.11   |
|                     | <b>TS<sub>H</sub></b> | 0.96      | 0.84   | -0.68     | -0.67  | -0.03           | -0.05  | 0.25           | 0.26   |
|                     | <b>I</b>              | 1.00      | 0.86   | -0.74     | -0.69  | 0.02            | 0.02   | 0.28           | 0.28   |

<sup>a</sup> Values from Mulliken population analysis. <sup>b</sup> The transferred hydrogen.



**Table S11.** Mulliken charge analysis of the reactants, transition states, and intermediates in solution for (a)  $^3\delta$  and  $^3\pi$ -pathways; (b)  $^5\sigma$  and  $^5\pi$ -pathways; for methane hydroxylation by  $[\text{Fe}^{\text{IV}}=\text{O}(\text{TMC})(\text{L})]^+$  with  $\text{L} = \text{F}^-$ , and  $\text{CF}_3\text{CO}_2^-$ .<sup>a</sup>

| (a)                                              |                       | Fe   |      | O     |       | CH <sub>3</sub> |       | H <sup>b</sup> |      |
|--------------------------------------------------|-----------------------|------|------|-------|-------|-----------------|-------|----------------|------|
| solution                                         |                       | 3σ   | 3π   | 3σ    | 3π    | 3σ              | 3π    | 3σ             | 3π   |
| L = F <sup>-</sup>                               | <b>R</b>              | 0.85 | 0.85 | -0.60 | -0.60 | -0.13           | -0.13 | 0.13           | 0.13 |
|                                                  | <b>TS<sub>H</sub></b> | 0.73 | 0.70 | -0.74 | -0.66 | -0.09           | -0.07 | 0.31           | 0.28 |
|                                                  | <b>I</b>              | 0.86 | 0.63 | -0.68 | -0.69 | 0.02            | 0.01  | 0.28           | 0.27 |
| L = CF <sub>3</sub> CO <sub>2</sub> <sup>-</sup> | <b>R</b>              | 0.87 | 0.87 | -0.53 | -0.53 | -0.13           | -0.13 | 0.13           | 0.13 |
|                                                  | <b>TS<sub>H</sub></b> | 0.85 | 0.79 | -0.69 | -0.59 | -0.04           | 0.03  | 0.29           | 0.27 |
|                                                  | <b>I</b>              | 0.91 | 0.69 | -0.74 | -0.62 | 0.02            | 0.02  | 0.28           | 0.28 |

  

| (b)                                              |                       | Fe   |       | O     |       | CH <sub>3</sub> |       | H <sup>b</sup> |      |
|--------------------------------------------------|-----------------------|------|-------|-------|-------|-----------------|-------|----------------|------|
| solution                                         |                       | 5σ   | 5π    | 5σ    | 5π    | 5σ              | 5π    | 5σ             | 5π   |
| L = F <sup>-</sup>                               | <b>R</b>              | 0.96 | -0.56 | -0.56 | -0.56 | -0.13           | -0.13 | 0.13           | 0.13 |
|                                                  | <b>TS<sub>H</sub></b> | 0.97 | -0.65 | -0.65 | -0.64 | -0.06           | -0.09 | 0.27           | 0.28 |
|                                                  | <b>I</b>              | 1.03 | -0.75 | -0.75 | -0.68 | 0.02            | 0.02  | 0.29           | 0.29 |
| L = CF <sub>3</sub> CO <sub>2</sub> <sup>-</sup> | <b>R</b>              | 0.98 | 0.98  | -0.49 | -0.49 | -0.13           | -0.13 | 0.13           | 0.13 |
|                                                  | <b>TS<sub>H</sub></b> | 1.14 | 0.83  | -0.62 | -0.58 | 0.01            | -0.01 | 0.26           | 0.25 |
|                                                  | <b>I</b>              | 1.20 | 0.96  | -0.70 | -0.61 | 0.03            | 0.02  | 0.29           | 0.28 |

<sup>a</sup> Values from Mulliken population analysis. <sup>b</sup> The transferred hydrogen.

1. Schematic MO diagrams of  $^5\sigma$ , and  $^3,5\pi$ -pathways for the hydrogen-atom abstraction by  $[\text{Fe}^{\text{IV}}=\text{O}(\text{TMC})(\text{OH})]^+$  in solution.

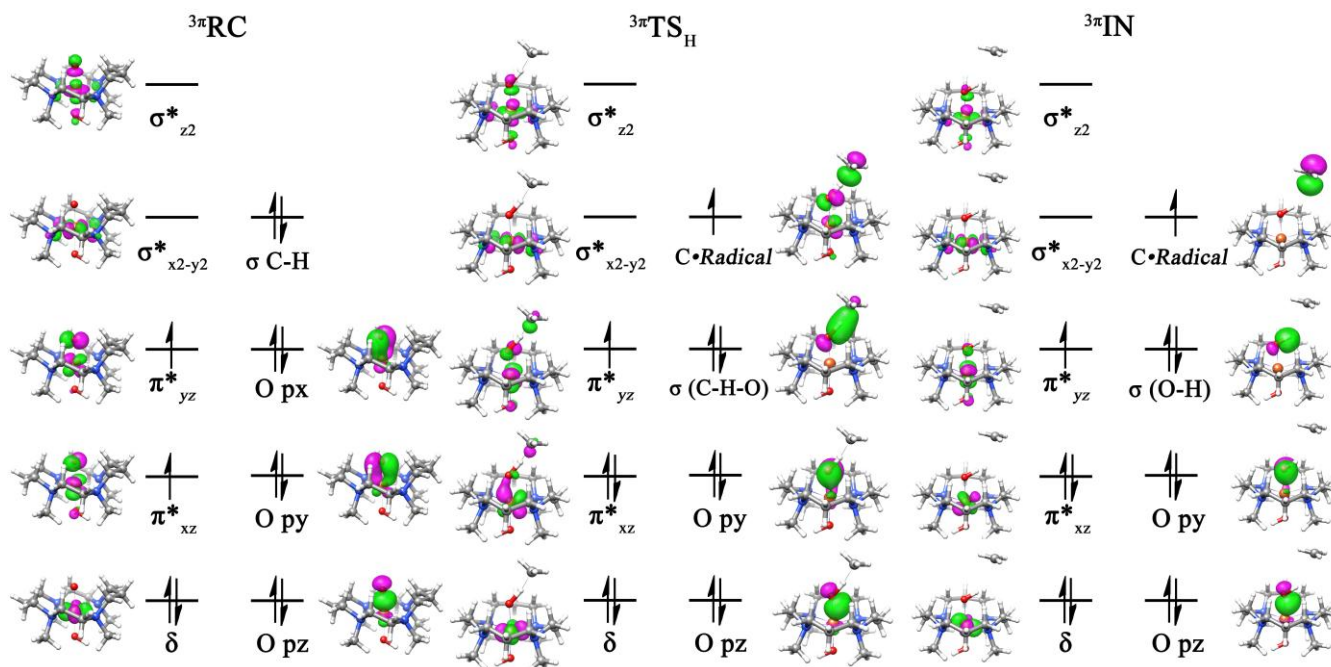

Figure S1. Schematic MO diagram of  $^3\pi$ -pathway for the hydrogen-atom abstraction by  $[\text{Fe}^{\text{IV}}=\text{O}(\text{TMC})(\text{OH})]^+$  in solution.

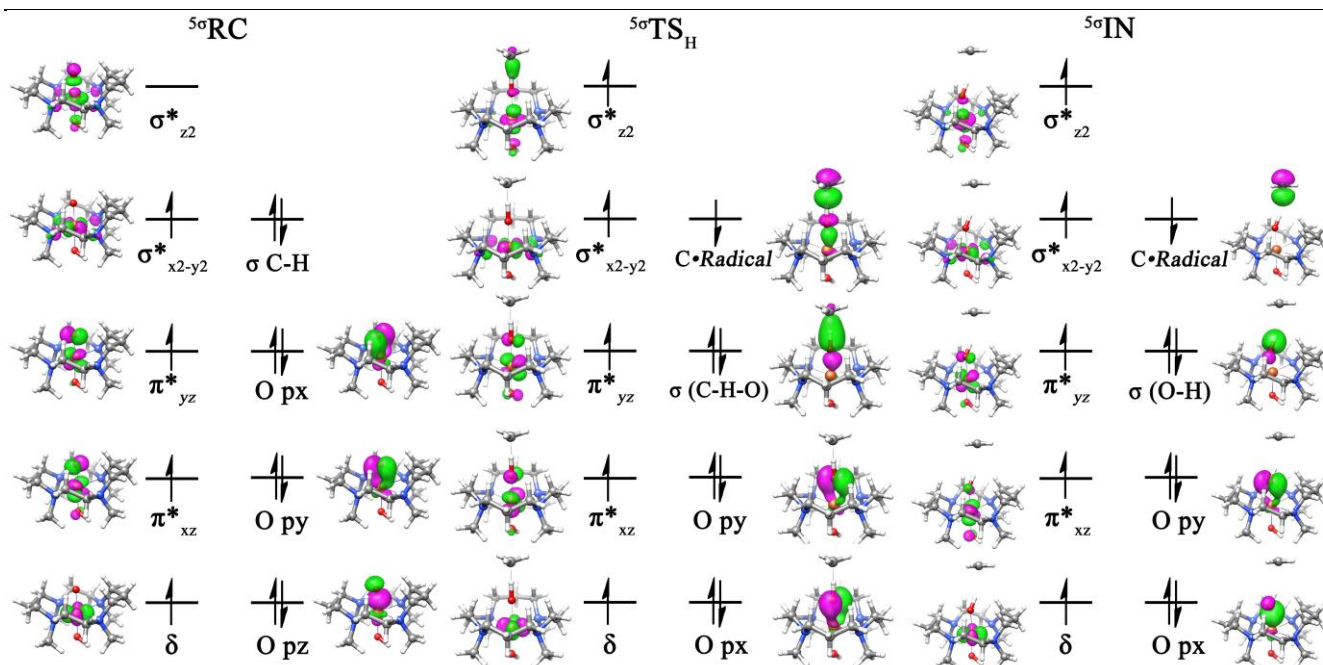

**Figure S2.** Schematic MO diagram of  $5\sigma$ -pathway for the hydrogen-atom abstraction by  $[\text{Fe}^{\text{IV}}=\text{O}(\text{TMC})(\text{OH})]^+$  in solution.

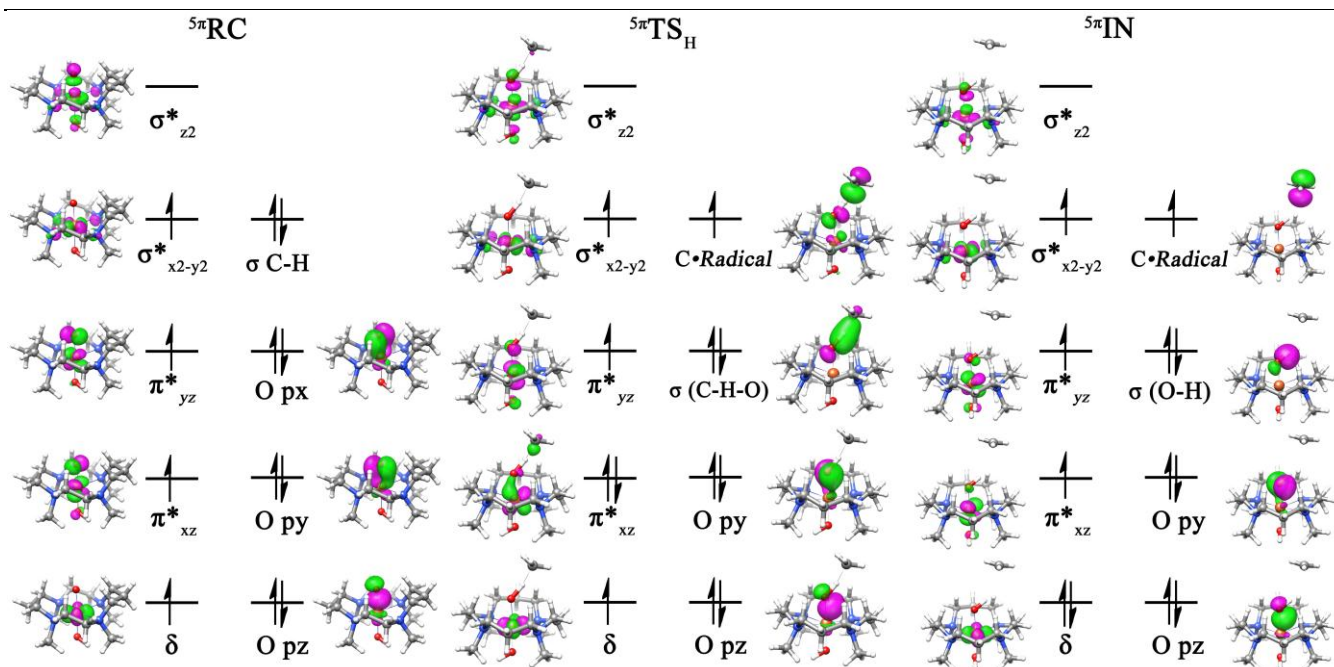

**Figure S3.** Schematic MO diagram of  $5\pi$ -pathway for the hydrogen-atom abstraction by  $[\text{Fe}^{\text{IV}}=\text{O}(\text{TMC})(\text{OH})]^+$  in solution.

2. Schematic MO diagrams of  $^5\sigma$ , and  $^{3,5}\pi$ -pathways for the hydrogen-atom abstraction by  $[\text{Fe}^{\text{IV}}=\text{O}(\text{TMC})(\text{SR})]^+$  in solution.

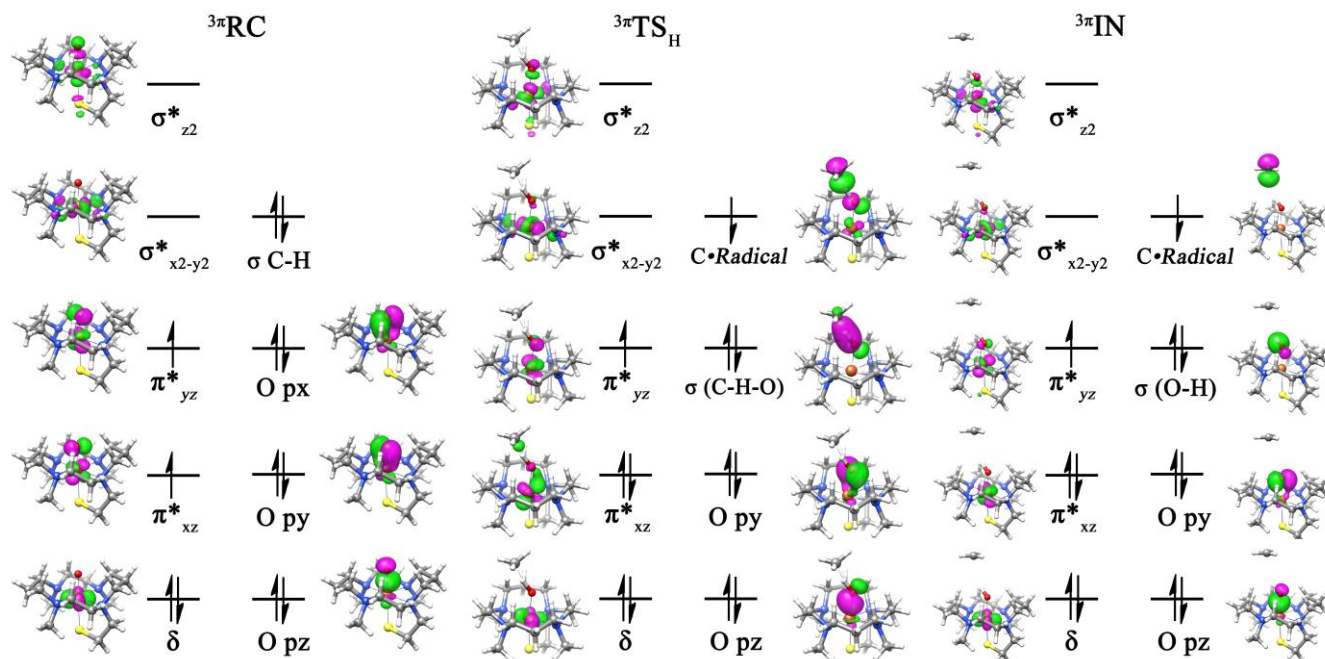

**Figure S4.** Schematic MO diagram of  $^3\pi$ -pathway for the hydrogen-atom abstraction by  $[\text{Fe}^{\text{IV}}=\text{O}(\text{TMC})(\text{SR})]^+$  in solution.

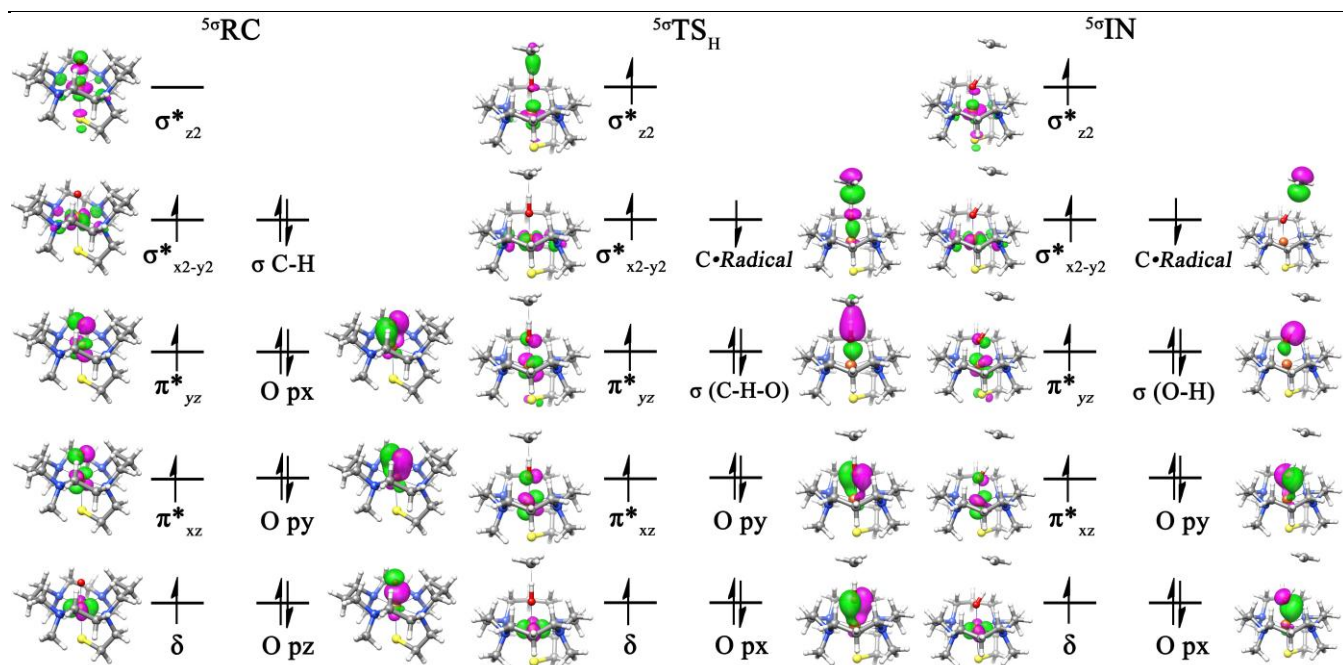

**Figure S5.** Schematic MO diagram of  $5\sigma$ -pathway for the hydrogen-atom abstraction by  $[\text{Fe}^{\text{IV}}=\text{O}(\text{TMC})(\text{SR})]^+$  in solution.

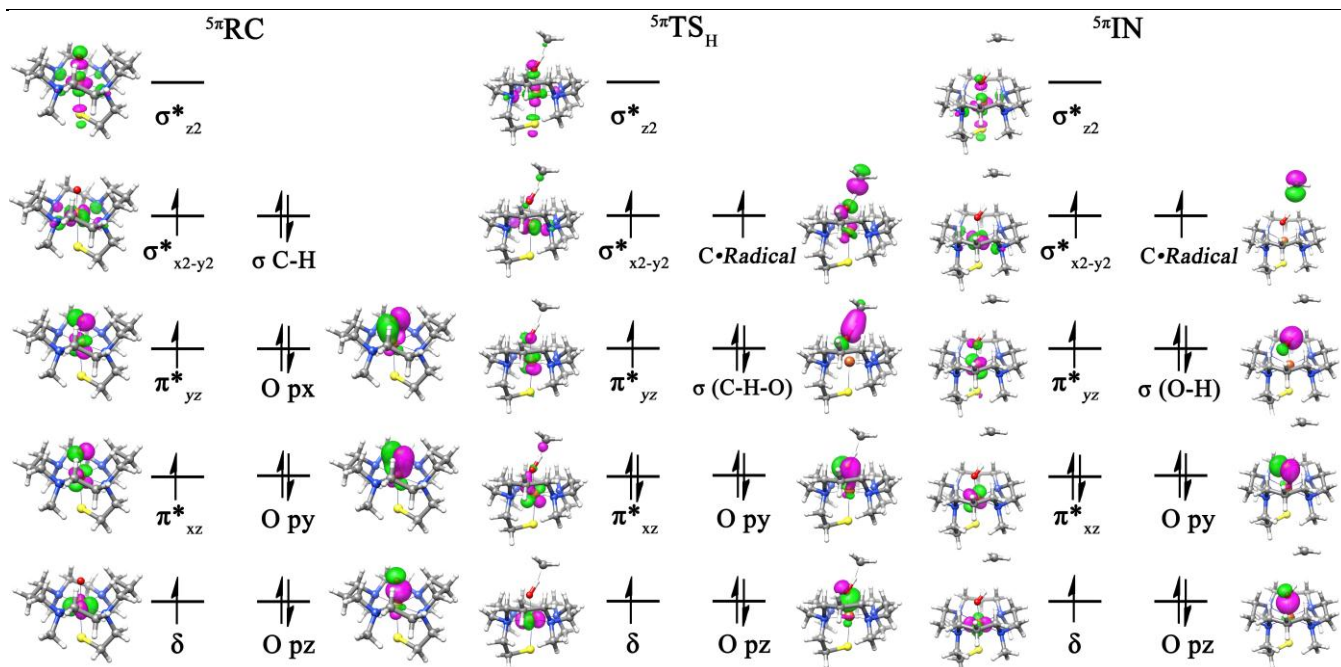

**Figure S6.** Schematic MO diagram of  $5\pi$ -pathway for the hydrogen-atom abstraction by  $[\text{Fe}^{\text{IV}}=\text{O}(\text{TMC})(\text{SR})]^+$  in solution.

3. Schematic MO diagrams of  ${}^{3,5}\sigma$  and  ${}^{3,5}\pi$ -pathways for the hydrogen-atom abstraction by  $[\text{Fe}^{\text{IV}}=\text{O}(\text{TMC})(\text{F})]^+$  in solution.

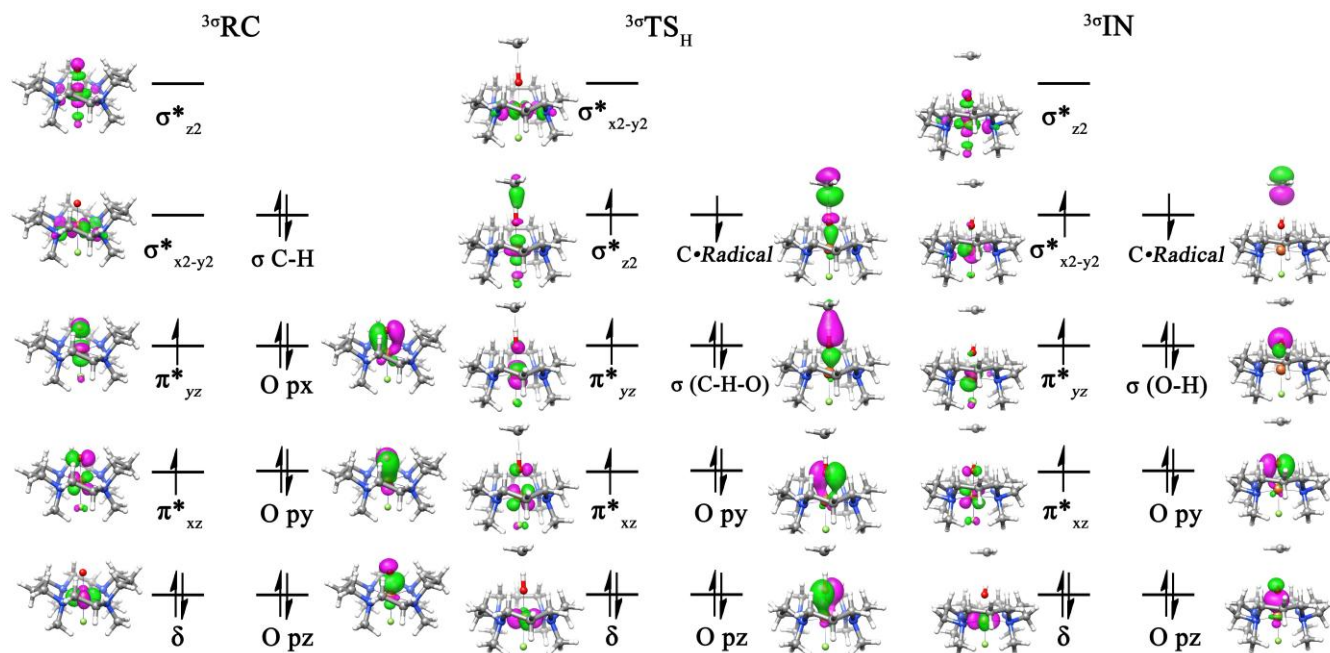

**Figure S7.** Schematic MO diagram of  ${}^3\sigma$ -pathway for the hydrogen-atom abstraction by  $[\text{Fe}^{\text{IV}}=\text{O}(\text{TMC})(\text{F})]^+$  in solution.



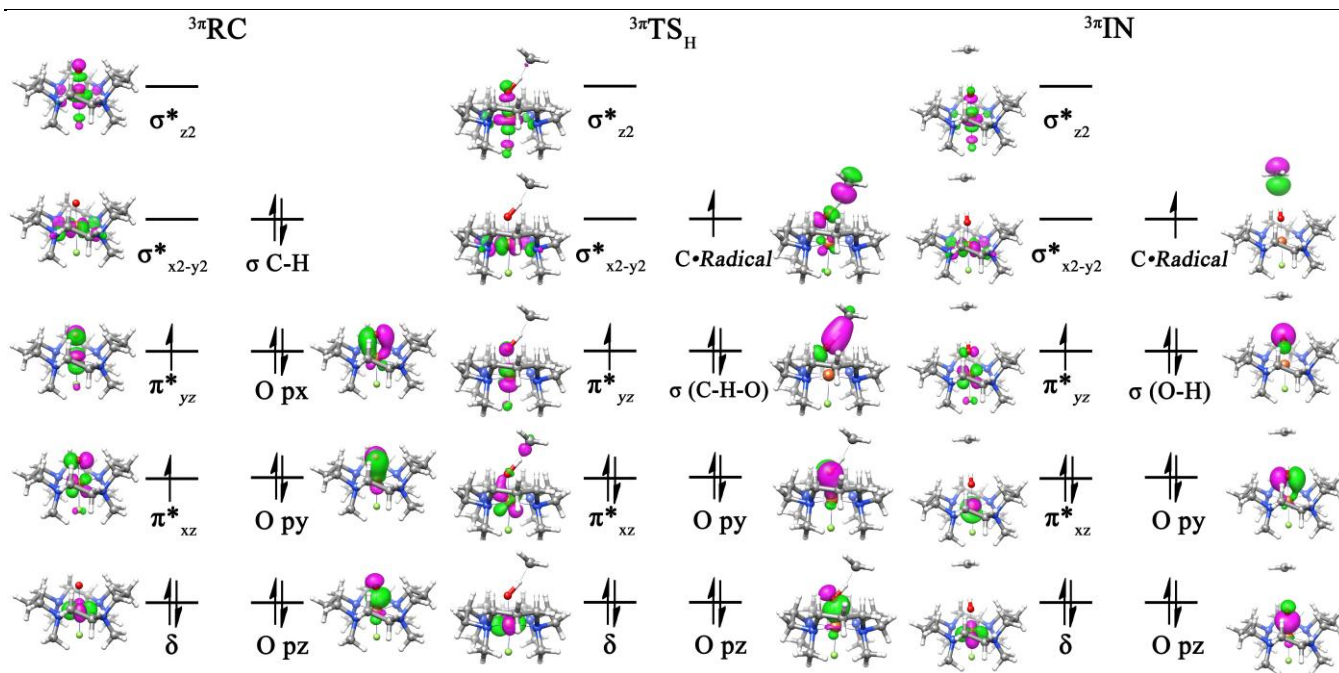

**Figure S8.** Schematic MO diagram of  $^3\pi$ -pathway for the hydrogen-atom abstraction by  $[\text{Fe}^{\text{IV}}=\text{O}(\text{TMC})(\text{F})]^+$  in solution.

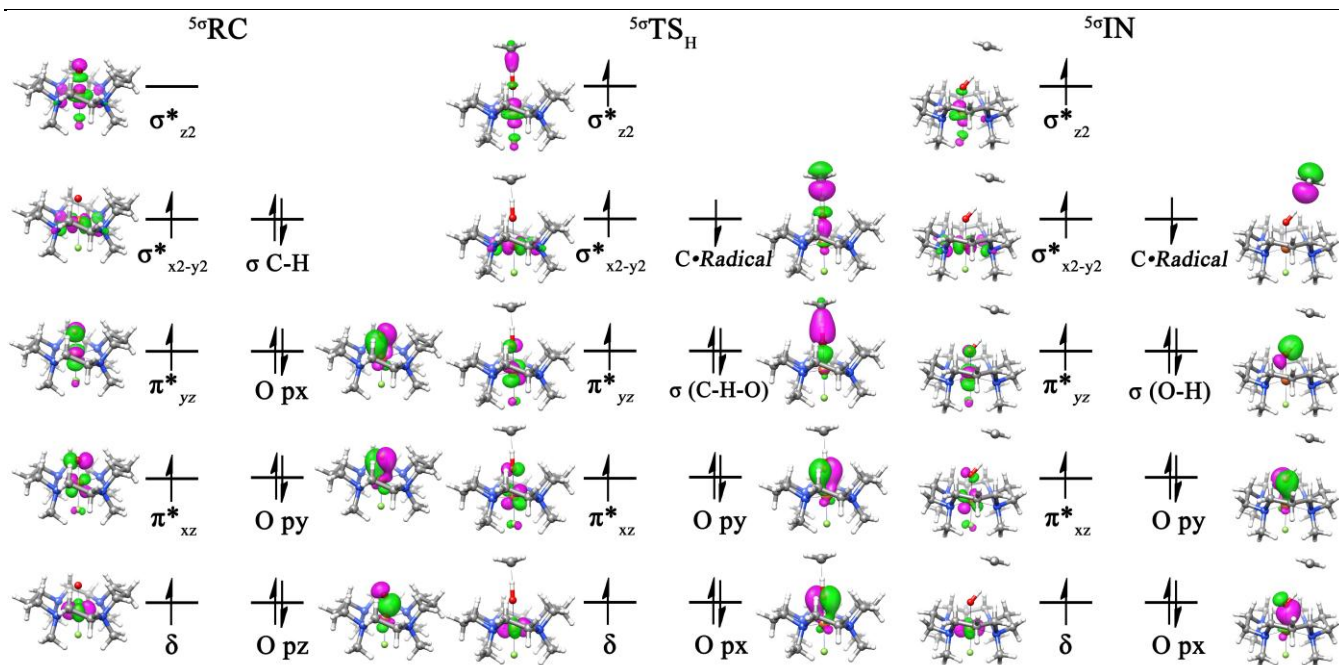

**Figure S9.** Schematic MO diagram of  $5\sigma$ -pathway for the hydrogen-atom abstraction by  $[\text{Fe}^{\text{IV}}=\text{O}(\text{TMC})(\text{F})]^+$  in solution.

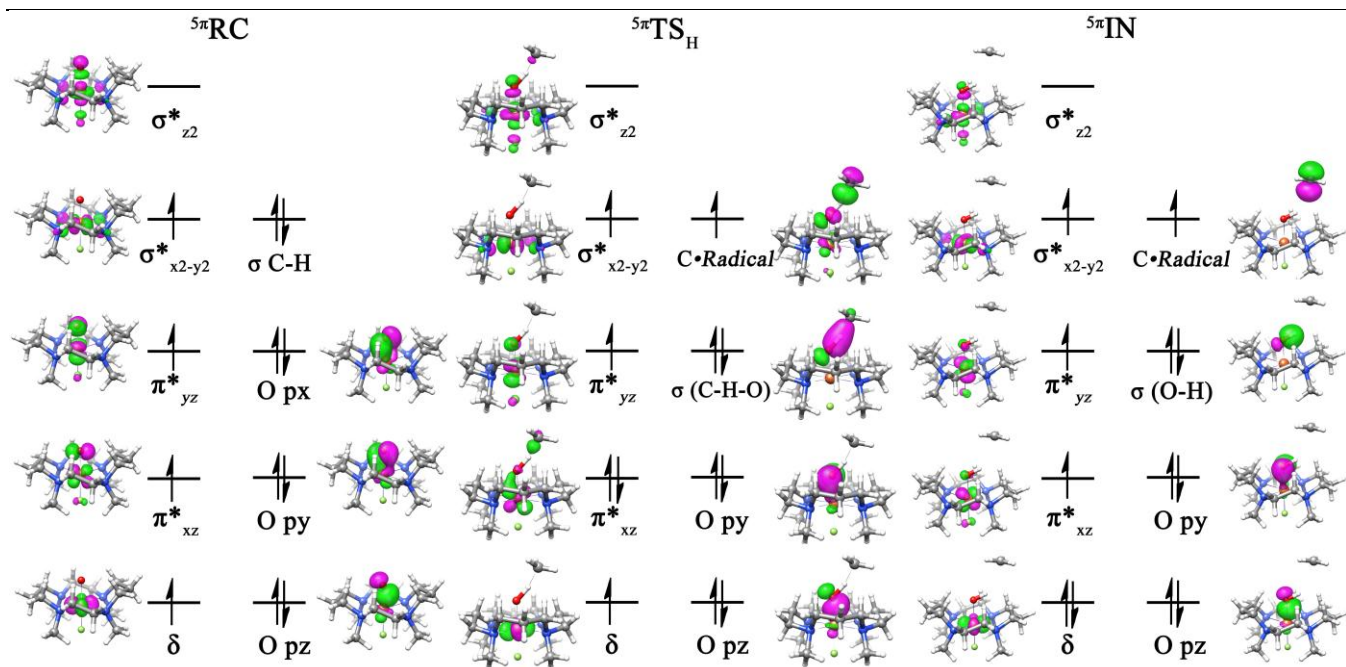

**Figure S10.** Schematic MO diagram of  $5\pi$ -pathway for the hydrogen-atom abstraction by  $[\text{Fe}^{\text{IV}}=\text{O}(\text{TMC})(\text{F})]^+$  in solution.

4. Schematic MO diagrams of  ${}^{3,5}\sigma$  and  ${}^{3,5}\pi$ -pathways for the hydrogen-atom abstraction by  $[\text{Fe}^{\text{IV}}=\text{O}(\text{TMC})(\text{CF}_3\text{CO}_2)]^+$  in solution.

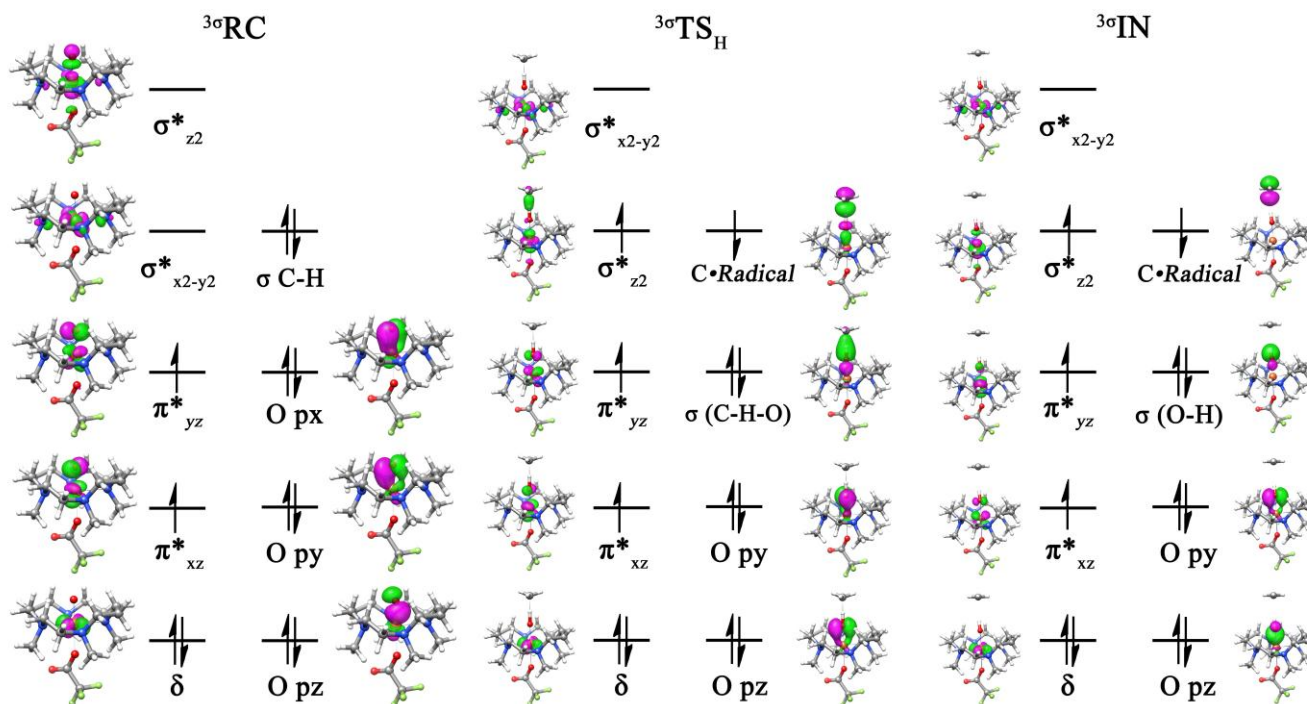

**Figure S11.** Schematic MO diagram of  ${}^3\sigma$ -pathway for the hydrogen-atom abstraction by  $[\text{Fe}^{\text{IV}}=\text{O}(\text{TMC})(\text{CF}_3\text{CO}_2)]^+$  in solution.

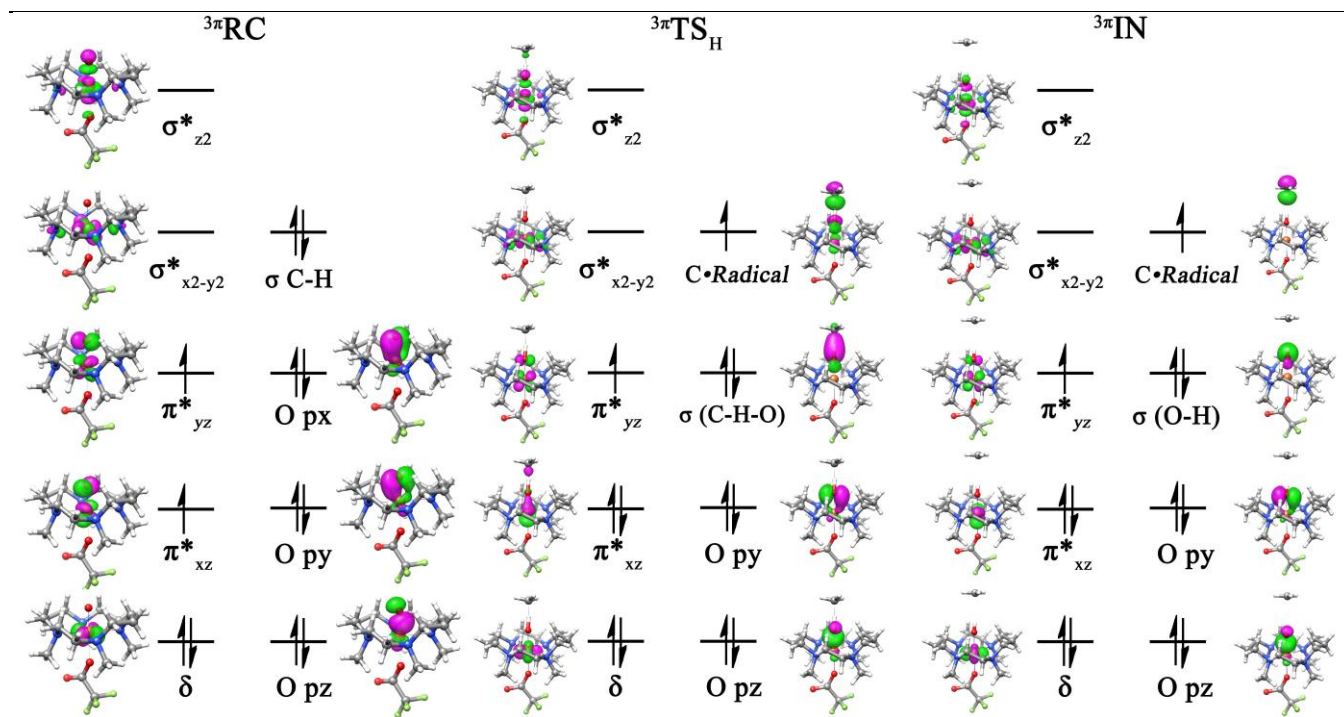

**Figure S12.** Schematic MO diagram of  $^3\pi$ -pathway for the hydrogen-atom abstraction by  $[\text{Fe}^{\text{IV}}=\text{O}(\text{TMC})(\text{CF}_3\text{CO}_2)]^+$  in solution.

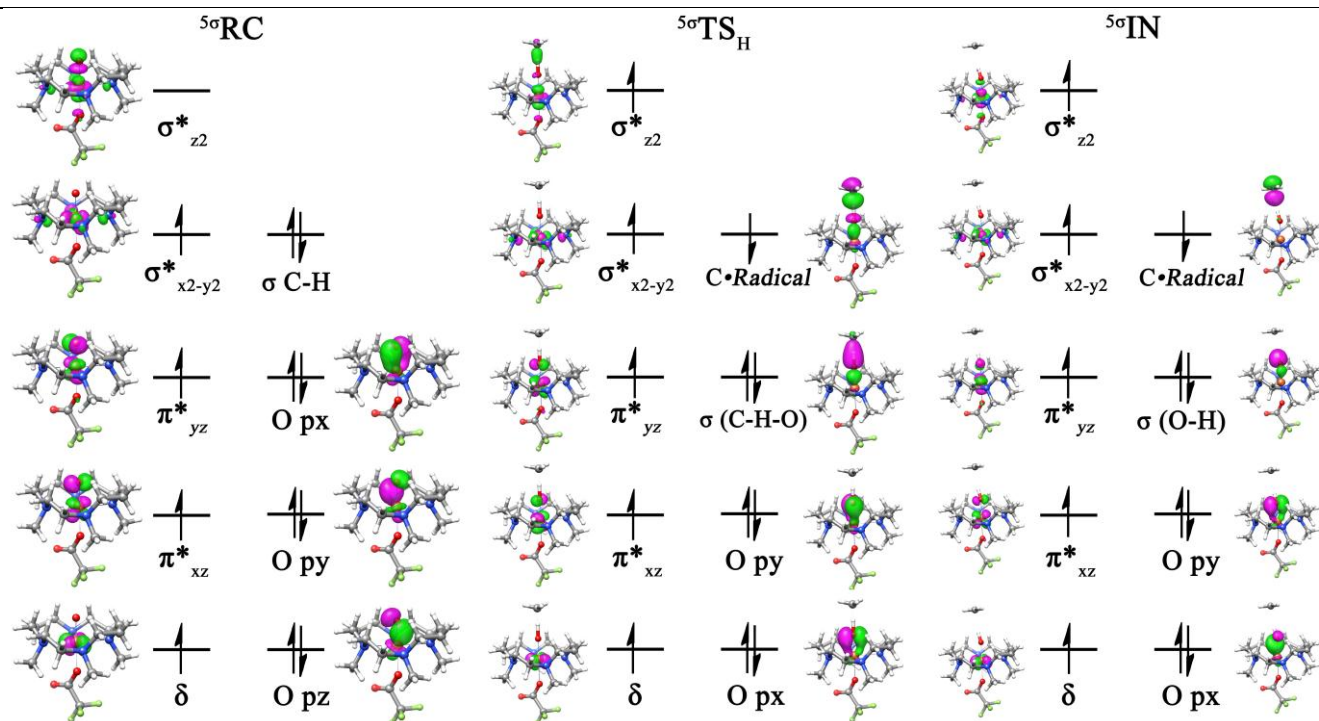

**Figure S13.** Schematic MO diagram of  $5\sigma$ -pathway for the hydrogen-atom abstraction by  $[\text{Fe}^{\text{IV}}=\text{O}(\text{TMC})(\text{CF}_3\text{CO}_2)]^+$  in solution.

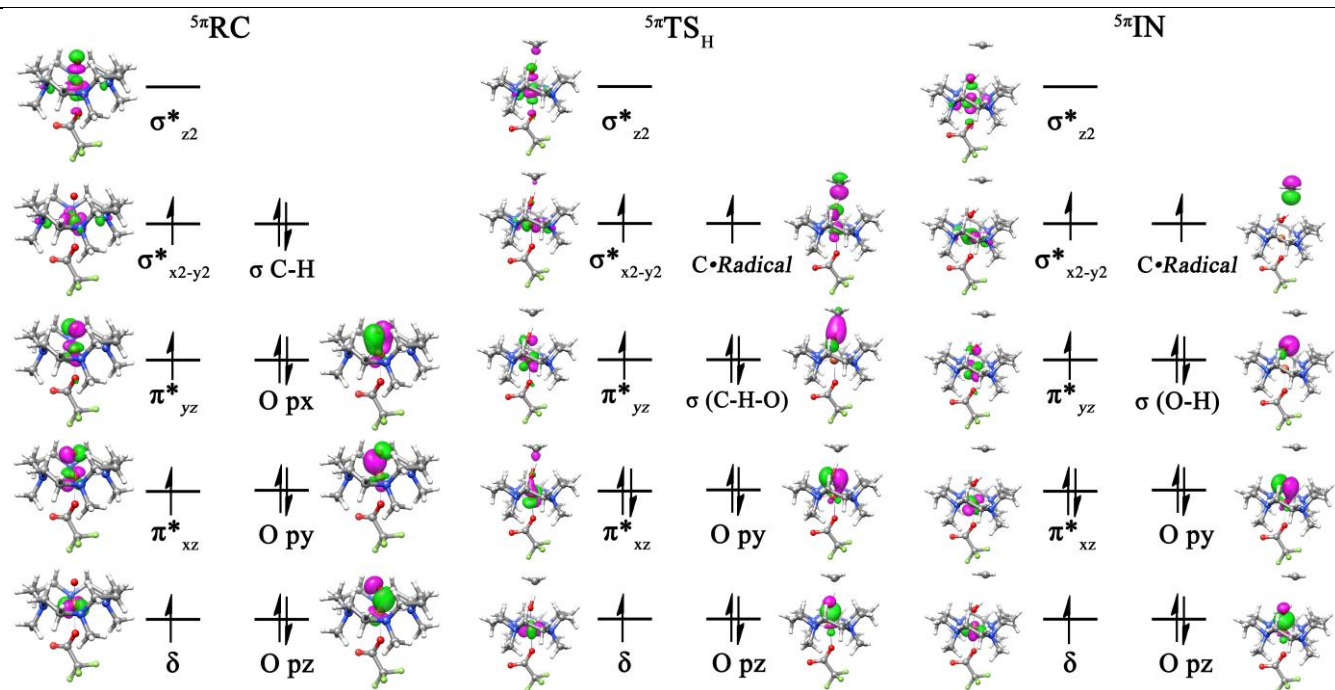

**Figure S14.** Schematic MO diagram of  $5\pi$ -pathway for the hydrogen-atom abstraction by  $[\text{Fe}^{\text{IV}}=\text{O}(\text{TMC})(\text{CF}_3\text{CO}_2)]^+$  in solution.

5. The gas-phase schematic MO diagrams of  ${}^3\delta$ ,  ${}^5\sigma$  and  ${}^{3,5}\pi$ -pathways for the hydrogen-atom abstraction by **1**.

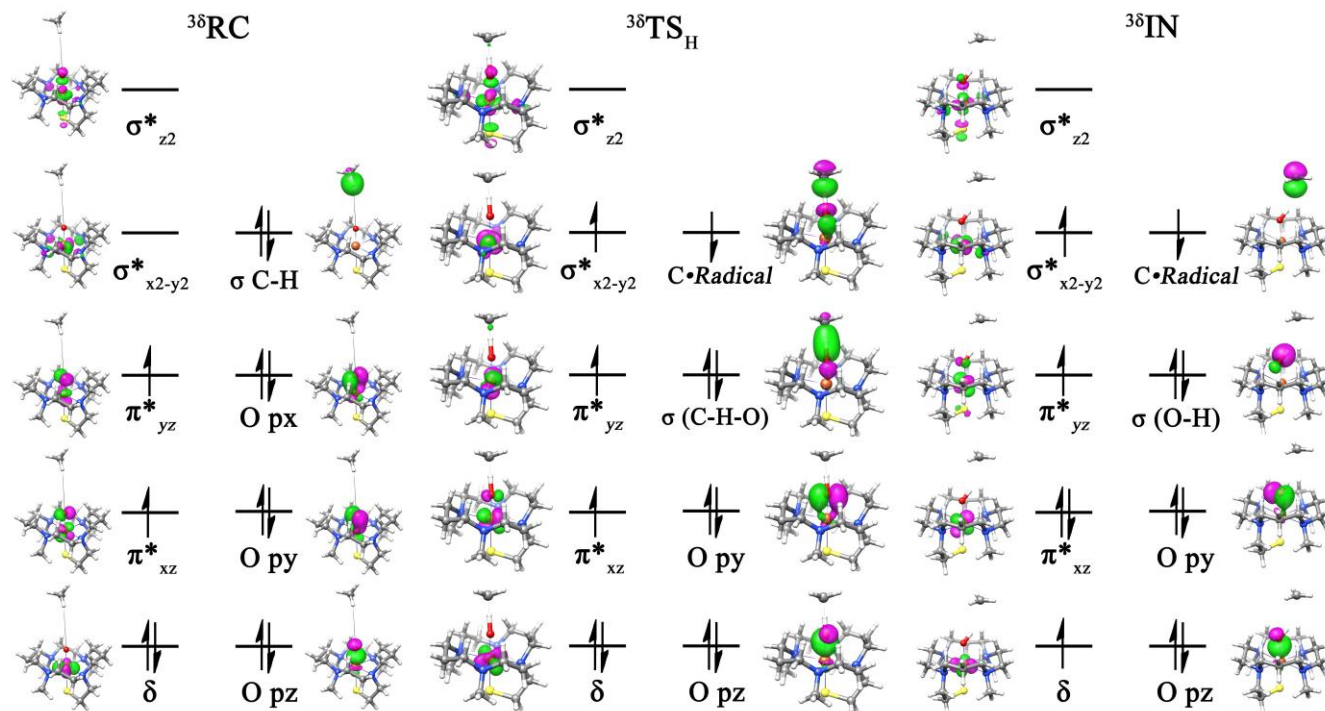

**Figure S15.** Schematic MO diagram of  ${}^3\delta$ -pathway for the hydrogen-atom abstraction by  $[\text{Fe}^{\text{IV}}=\text{O}(\text{TMC})(\text{SR})]^+$  in the gas phase.



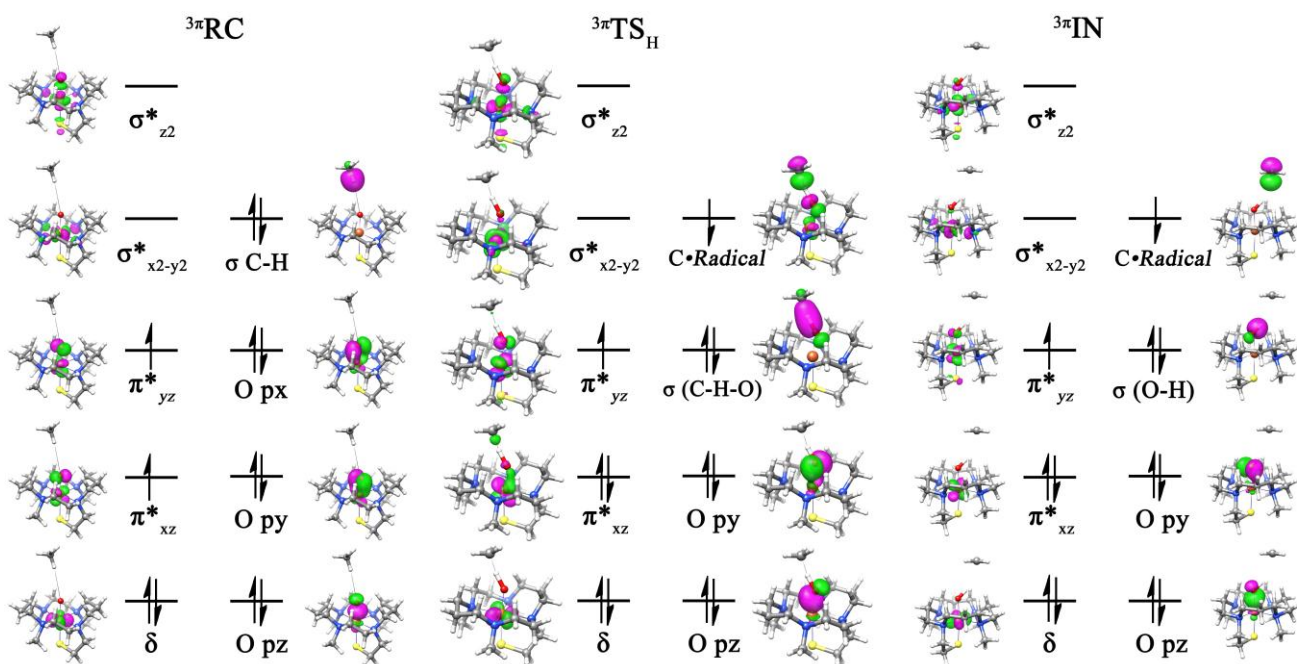

**Figure S16.** Schematic MO diagram of  $3\pi$ -pathway for the hydrogen-atom abstraction by  $[\text{Fe}^{\text{IV}}=\text{O}(\text{TMC})(\text{SR})]^+$  in the gas phase.

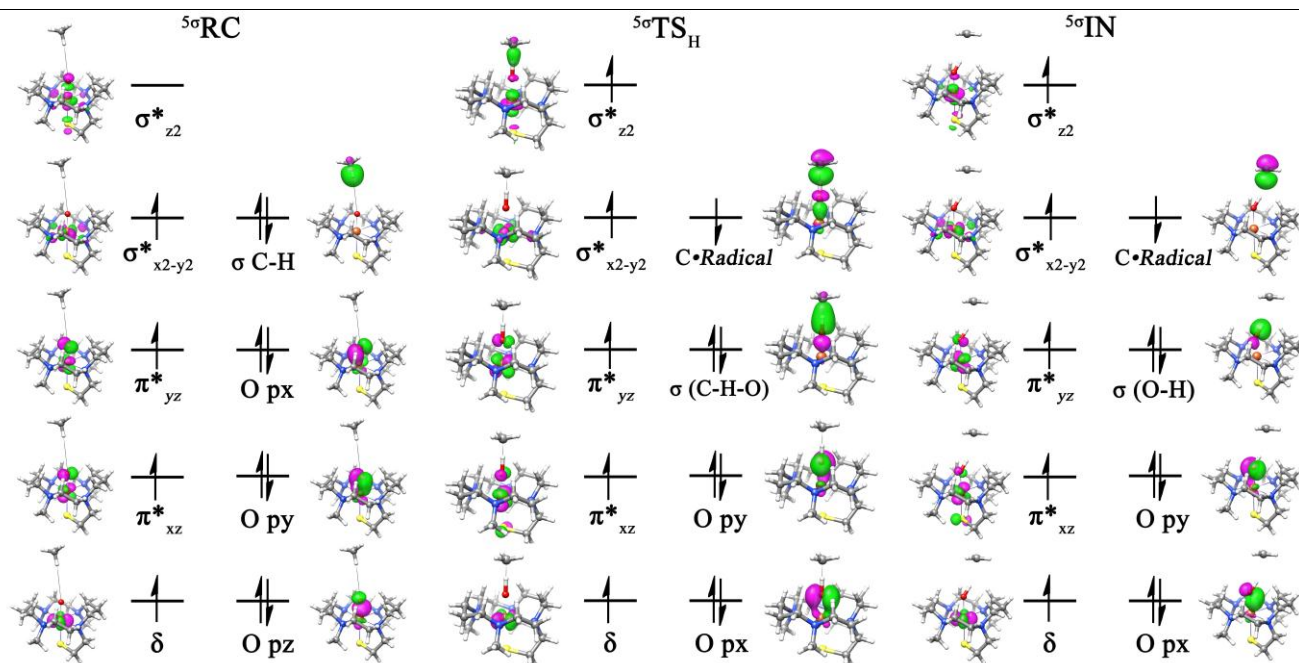

**Figure S17.** Schematic MO diagram of  $5\sigma$ -pathway for the hydrogen-atom abstraction by  $[\text{Fe}^{\text{IV}}=\text{O}(\text{TMC})(\text{SR})]^+$  in the gas phase.

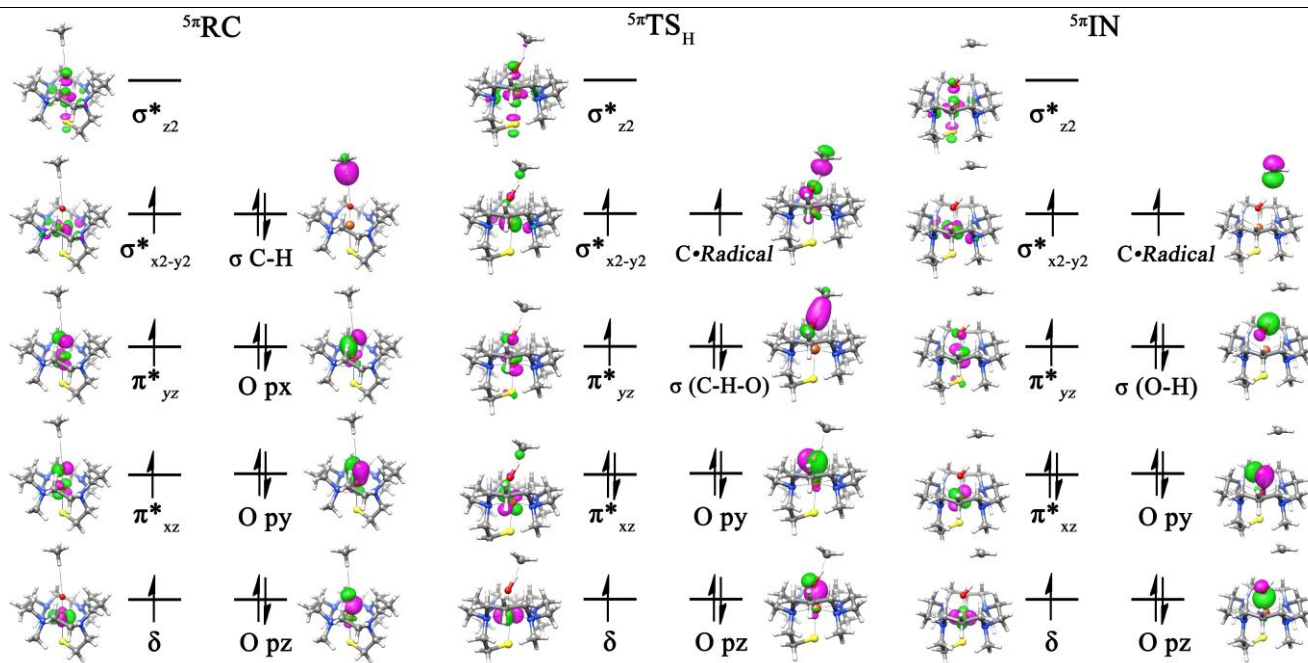

**Figure S18.** Schematic MO diagram of  $5\pi$ -pathway for the hydrogen-atom abstraction by  $[\text{Fe}^{\text{IV}}=\text{O}(\text{TMC})(\text{SR})]^+$  in the gas phase.

6. The gas-phase schematic MO diagrams of  ${}^3\delta$ ,  ${}^5\sigma$  and  ${}^{3,5}\pi$ -pathways for the hydrogen-atom abstraction by 2.

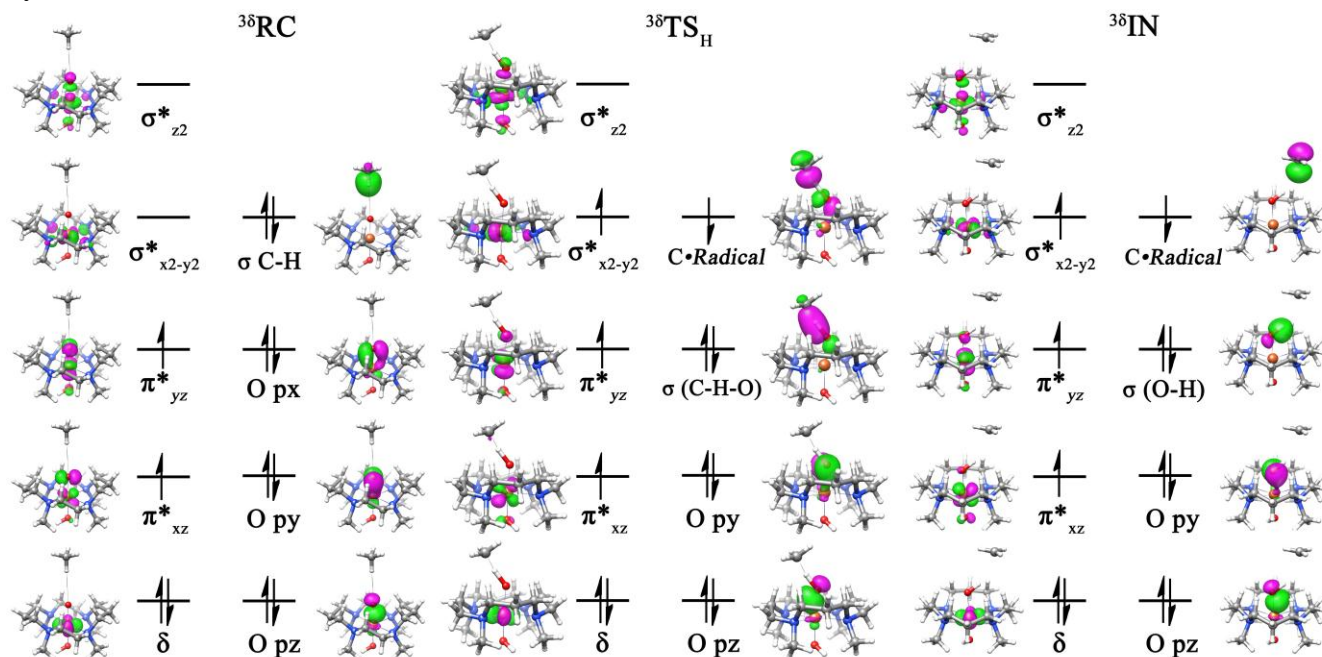

**Figure S19.** Schematic MO diagram of  ${}^3\delta$ -pathway for the hydrogen-atom abstraction by  $[\text{Fe}^{\text{IV}}=\text{O}(\text{TMC})(\text{OH})]^+$  in the gas phase.

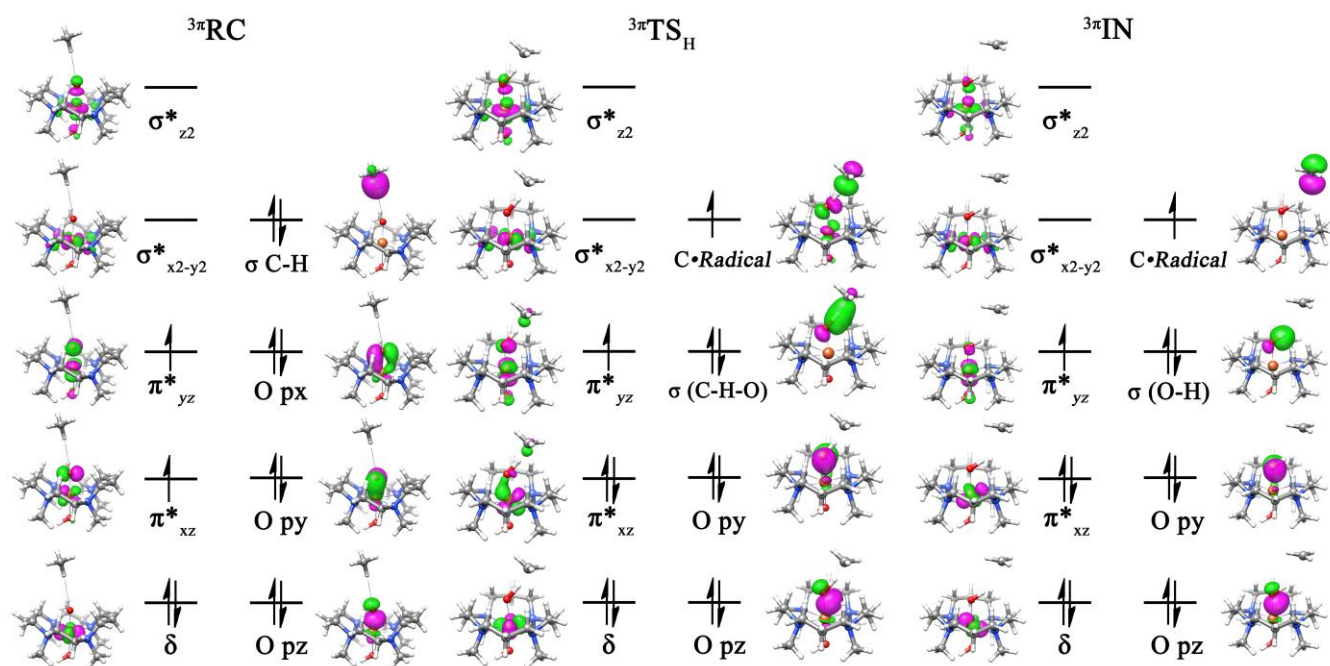

**Figure S20.** Schematic MO diagram of  $3\pi$ -pathway for the hydrogen-atom abstraction by  $[\text{Fe}^{\text{IV}}=\text{O}(\text{TMC})(\text{OH})]^+$  in the gas phase.

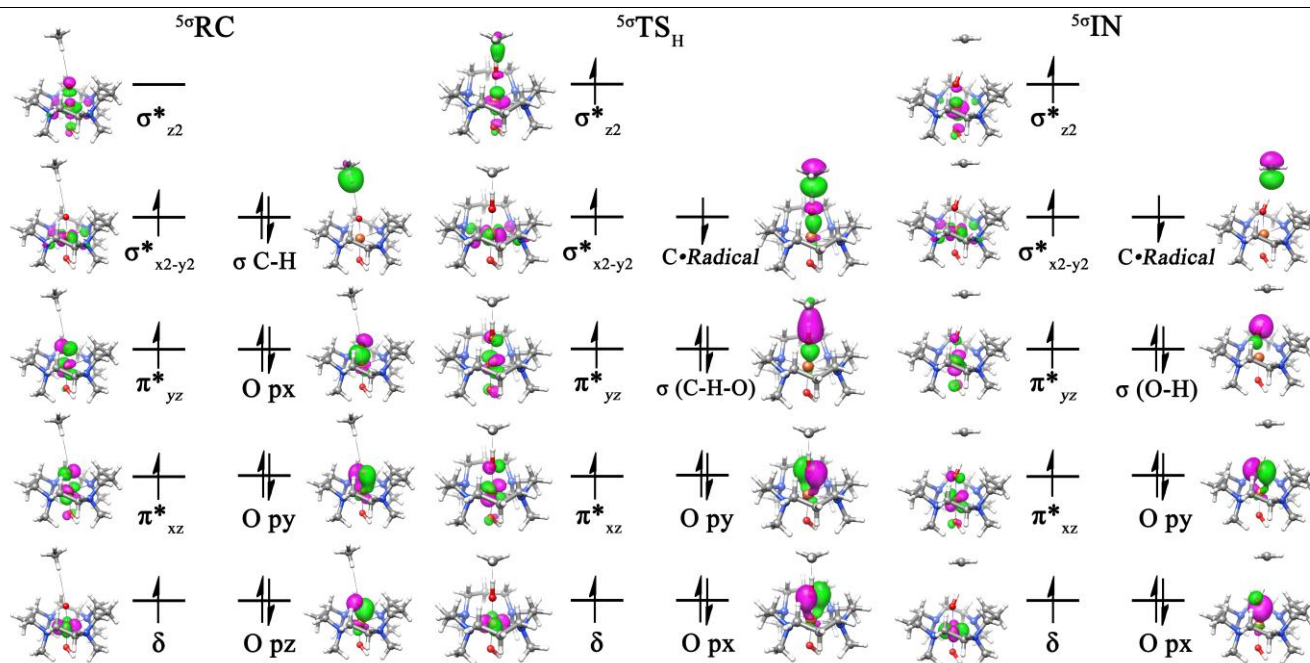

**Figure S21.** Schematic MO diagram of  $5\sigma$ -pathway for the hydrogen-atom abstraction by  $[\text{Fe}^{\text{IV}}=\text{O}(\text{TMC})(\text{OH})]^+$  in the gas phase.

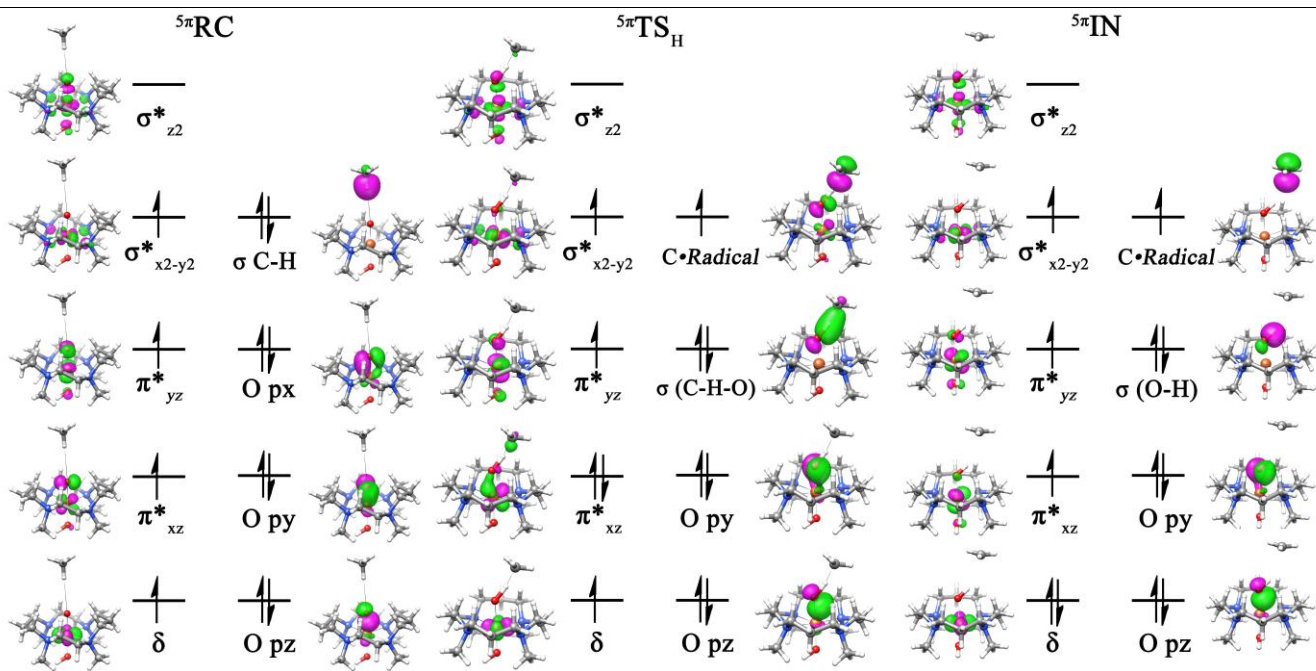

**Figure S22.** Schematic MO diagram of  $5\pi$ -pathway for the hydrogen-atom abstraction by  $[\text{Fe}^{\text{IV}}=\text{O}(\text{TMC})(\text{OH})]^+$  in the gas phase.

### Part 3 All xyz coordinates

#### The gas-phase optimized geometries

Cat

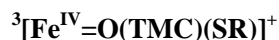

|    |           |           |           |
|----|-----------|-----------|-----------|
| Fe | -0.136058 | 0.651908  | 0.206703  |
| O  | -0.181340 | 0.630394  | 1.865474  |
| N  | -2.286341 | 0.610485  | 0.305146  |
| C  | -2.819622 | 1.680109  | 1.202806  |
| C  | -2.503745 | -0.705493 | 0.975897  |
| C  | -3.052791 | 0.654912  | -0.969606 |
| N  | 0.084682  | 2.757949  | 0.347352  |
| C  | 1.365066  | 2.881039  | 1.112401  |
| C  | -0.970344 | 3.418168  | 1.182179  |
| C  | 0.185276  | 3.477686  | -0.950693 |
| C  | -2.409798 | 3.094168  | 0.811425  |
| N  | 2.071200  | 0.616099  | 0.286857  |
| C  | 2.461416  | 2.048666  | 0.495798  |
| C  | 2.415293  | -0.213939 | 1.485204  |
| C  | 2.902676  | 0.158055  | -0.864602 |
| N  | -0.263638 | -1.434802 | 0.128938  |
| C  | -1.718023 | -1.790954 | 0.274797  |
| C  | 0.494881  | -2.011157 | 1.291808  |
| C  | 0.224723  | -2.021386 | -1.162230 |
| C  | 1.989163  | -1.681494 | 1.379292  |
| H  | 1.677950  | 3.930977  | 1.143582  |
| H  | 1.161686  | 2.551579  | 2.127018  |
| H  | 3.359025  | 2.100477  | 1.120021  |
| H  | 2.733315  | 2.454259  | -0.477075 |
| H  | 2.337578  | -2.163903 | 2.297262  |
| H  | 2.538493  | -2.181514 | 0.580575  |
| H  | -0.004584 | -1.658544 | 2.190828  |
| H  | 0.391863  | -3.101658 | 1.244722  |
| H  | -0.802998 | 3.106597  | 2.211331  |
| H  | -0.804131 | 4.499384  | 1.127460  |
| H  | -2.621612 | 3.307165  | -0.237895 |
| H  | -3.042006 | 3.781222  | 1.380381  |
| H  | -2.456399 | 1.470717  | 2.206671  |
| H  | -3.911773 | 1.595800  | 1.210936  |
| H  | -2.757913 | -0.150726 | -1.630047 |
| H  | -4.121827 | 0.572035  | -0.748613 |
| H  | -2.860038 | 1.583129  | -1.495886 |
| H  | -2.176041 | -0.601588 | 2.006571  |
| H  | -3.569549 | -0.959412 | 0.972771  |
| H  | -2.122980 | -1.964869 | -0.719172 |
| H  | -1.810941 | -2.732908 | 0.821639  |
| H  | 2.809996  | -0.908446 | -1.023344 |
| H  | 2.581132  | 0.662077  | -1.770012 |
| H  | 3.954481  | 0.378629  | -0.655374 |
| H  | 0.945883  | 3.029690  | -1.582249 |
| H  | -0.759892 | 3.414881  | -1.482739 |
| H  | 0.430263  | 4.529559  | -0.774778 |
| H  | 3.503600  | -0.182026 | 1.617602  |
| H  | 1.946838  | 0.243835  | 2.351599  |



---

|                                                                                 |           |           |           |
|---------------------------------------------------------------------------------|-----------|-----------|-----------|
| S                                                                               | -0.082874 | 0.571014  | -2.148538 |
| C                                                                               | -0.267052 | -1.250260 | -2.375819 |
| H                                                                               | 0.317374  | -1.551650 | -3.245916 |
| H                                                                               | -1.306999 | -1.487087 | -2.609140 |
| H                                                                               | 1.307495  | -2.016641 | -1.143897 |
| H                                                                               | -0.090637 | -3.071448 | -1.208303 |
| <b><math>^5[\text{Fe}^{\text{IV}}=\text{O}(\text{TMC})(\text{SR})]^+</math></b> |           |           |           |
| Fe                                                                              | -0.159156 | 0.669259  | 0.189742  |
| O                                                                               | -0.202628 | 0.646483  | 1.857545  |
| N                                                                               | -2.420155 | 0.575757  | 0.297874  |
| C                                                                               | -2.883159 | 1.693333  | 1.171173  |
| C                                                                               | -2.549660 | -0.728057 | 1.001181  |
| C                                                                               | -3.216117 | 0.574687  | -0.949990 |
| N                                                                               | 0.131926  | 2.822300  | 0.338839  |
| C                                                                               | 1.392576  | 2.895462  | 1.142329  |
| C                                                                               | -0.972030 | 3.434964  | 1.150687  |
| C                                                                               | 0.275925  | 3.559836  | -0.940183 |
| C                                                                               | -2.400770 | 3.080542  | 0.732026  |
| N                                                                               | 2.186020  | 0.636119  | 0.293045  |
| C                                                                               | 2.526139  | 2.065891  | 0.555623  |
| C                                                                               | 2.468388  | -0.231755 | 1.474505  |
| C                                                                               | 3.014641  | 0.207424  | -0.859819 |
| N                                                                               | -0.281386 | -1.489324 | 0.129208  |
| C                                                                               | -1.735133 | -1.823553 | 0.315302  |
| C                                                                               | 0.517632  | -2.032726 | 1.279288  |
| C                                                                               | 0.189688  | -2.046625 | -1.176506 |
| C                                                                               | 2.016845  | -1.693426 | 1.325373  |
| H                                                                               | 1.723419  | 3.938604  | 1.209465  |
| H                                                                               | 1.150796  | 2.548348  | 2.142654  |
| H                                                                               | 3.387296  | 2.130998  | 1.230194  |
| H                                                                               | 2.843199  | 2.500741  | -0.391123 |
| H                                                                               | 2.389392  | -2.208440 | 2.216105  |
| H                                                                               | 2.541614  | -2.170398 | 0.496653  |
| H                                                                               | 0.040585  | -1.665595 | 2.185480  |
| H                                                                               | 0.423771  | -3.125663 | 1.262639  |
| H                                                                               | -0.824437 | 3.117136  | 2.181038  |
| H                                                                               | -0.841417 | 4.522338  | 1.115021  |
| H                                                                               | -2.556392 | 3.238605  | -0.337520 |
| H                                                                               | -3.049385 | 3.809386  | 1.225300  |
| H                                                                               | -2.522472 | 1.494548  | 2.178541  |
| H                                                                               | -3.979284 | 1.680076  | 1.197640  |
| H                                                                               | -2.910510 | -0.233942 | -1.604940 |
| H                                                                               | -4.280227 | 0.462188  | -0.713489 |
| H                                                                               | -3.064978 | 1.500752  | -1.496691 |
| H                                                                               | -2.203818 | -0.585808 | 2.021496  |
| H                                                                               | -3.598812 | -1.045892 | 1.034162  |
| H                                                                               | -2.155568 | -2.033188 | -0.665719 |
| H                                                                               | -1.821895 | -2.746111 | 0.895972  |
| H                                                                               | 2.881067  | -0.848030 | -1.068753 |
| H                                                                               | 2.718983  | 0.757741  | -1.748711 |
| H                                                                               | 4.076013  | 0.381082  | -0.647166 |
| H                                                                               | 1.048675  | 3.110178  | -1.557210 |
| H                                                                               | -0.655883 | 3.518454  | -1.499151 |
| H                                                                               | 0.530638  | 4.606638  | -0.745275 |
| H                                                                               | 3.551514  | -0.231263 | 1.656339  |
| H                                                                               | 1.977848  | 0.211808  | 2.337404  |

---

|                                                                                 |           |           |           |
|---------------------------------------------------------------------------------|-----------|-----------|-----------|
| S                                                                               | -0.105659 | 0.564832  | -2.138560 |
| C                                                                               | -0.332982 | -1.256568 | -2.364500 |
| H                                                                               | 0.216525  | -1.552041 | -3.259055 |
| H                                                                               | -1.384463 | -1.468478 | -2.562705 |
| H                                                                               | 1.273928  | -2.017730 | -1.178059 |
| H                                                                               | -0.107268 | -3.101137 | -1.247592 |
| <b><math>^3[\text{Fe}^{\text{IV}}=\text{O}(\text{TMC})(\text{OH})]^+</math></b> |           |           |           |
| Fe                                                                              | -0.113166 | 0.648090  | 0.217556  |
| O                                                                               | -0.164745 | 0.606816  | 1.871753  |
| N                                                                               | -2.232008 | 0.583084  | 0.260753  |
| C                                                                               | -2.845557 | 1.662502  | 1.092099  |
| C                                                                               | -2.486400 | -0.709690 | 0.962106  |
| C                                                                               | -2.867833 | 0.583845  | -1.081791 |
| N                                                                               | 0.086375  | 2.747303  | 0.372220  |
| C                                                                               | 1.359253  | 2.874692  | 1.142982  |
| C                                                                               | -0.989329 | 3.390673  | 1.185526  |
| C                                                                               | 0.196185  | 3.455490  | -0.931215 |
| C                                                                               | -2.410919 | 3.077927  | 0.739901  |
| N                                                                               | 2.042911  | 0.624385  | 0.270860  |
| C                                                                               | 2.455171  | 2.049232  | 0.511912  |
| C                                                                               | 2.452451  | -0.233752 | 1.428629  |
| C                                                                               | 2.767232  | 0.197067  | -0.955775 |
| N                                                                               | -0.245357 | -1.511563 | 0.161373  |
| C                                                                               | -1.704740 | -1.835921 | 0.326960  |
| C                                                                               | 0.528021  | -2.023143 | 1.341663  |
| C                                                                               | 0.192745  | -2.230255 | -1.063977 |
| C                                                                               | 2.025143  | -1.701376 | 1.338303  |
| H                                                                               | 1.668740  | 3.925391  | 1.181448  |
| H                                                                               | 1.156584  | 2.534231  | 2.154241  |
| H                                                                               | 3.349585  | 2.073261  | 1.140933  |
| H                                                                               | 2.734648  | 2.476576  | -0.449017 |
| H                                                                               | 2.434113  | -2.185328 | 2.230063  |
| H                                                                               | 2.522827  | -2.196059 | 0.502534  |
| H                                                                               | 0.066863  | -1.602068 | 2.230931  |
| H                                                                               | 0.411476  | -3.113346 | 1.369503  |
| H                                                                               | -0.861316 | 3.050642  | 2.211933  |
| H                                                                               | -0.820496 | 4.472770  | 1.163917  |
| H                                                                               | -2.568046 | 3.303357  | -0.316263 |
| H                                                                               | -3.071862 | 3.757882  | 1.284043  |
| H                                                                               | -2.573803 | 1.461263  | 2.126749  |
| H                                                                               | -3.934054 | 1.572777  | 1.004267  |
| H                                                                               | -2.450694 | -0.197897 | -1.704969 |
| H                                                                               | -3.948004 | 0.440814  | -0.974215 |
| H                                                                               | -2.668622 | 1.522754  | -1.586652 |
| H                                                                               | -2.187954 | -0.574816 | 1.997680  |
| H                                                                               | -3.555922 | -0.947446 | 0.933221  |
| H                                                                               | -2.106765 | -2.056862 | -0.660029 |
| H                                                                               | -1.815435 | -2.746826 | 0.922195  |
| H                                                                               | 1.252887  | -2.103035 | -1.242904 |
| H                                                                               | -0.007934 | -3.301257 | -0.957899 |
| H                                                                               | -0.356156 | -1.859709 | -1.926116 |
| H                                                                               | 2.628836  | -0.859176 | -1.149464 |
| H                                                                               | 2.395348  | 0.760582  | -1.806494 |
| H                                                                               | 3.839746  | 0.378581  | -0.833171 |
| H                                                                               | 0.948027  | 2.991552  | -1.556637 |
| H                                                                               | -0.741270 | 3.384110  | -1.472413 |

---

|   |           |           |           |
|---|-----------|-----------|-----------|
| H | 0.439585  | 4.507244  | -0.751691 |
| H | 3.546291  | -0.198671 | 1.503039  |
| H | 2.029626  | 0.214134  | 2.324086  |
| O | -0.103104 | 0.812039  | -1.660146 |
| H | 0.232069  | 0.097880  | -2.206103 |

$^5[\text{Fe}^{\text{IV}}=\text{O}(\text{TMC})(\text{OH})]^+$

|    |           |           |           |
|----|-----------|-----------|-----------|
| Fe | -0.126136 | 0.683291  | 0.184678  |
| O  | -0.185399 | 0.642649  | 1.834884  |
| N  | -2.323537 | 0.535398  | 0.245402  |
| C  | -2.870572 | 1.660016  | 1.065580  |
| C  | -2.515005 | -0.747374 | 0.975031  |
| C  | -2.986924 | 0.507435  | -1.076346 |
| N  | 0.139900  | 2.859475  | 0.374593  |
| C  | 1.395267  | 2.911327  | 1.174320  |
| C  | -0.987412 | 3.437081  | 1.165723  |
| C  | 0.290585  | 3.593643  | -0.903251 |
| C  | -2.389674 | 3.061532  | 0.674980  |
| N  | 2.124357  | 0.638215  | 0.283356  |
| C  | 2.503645  | 2.062167  | 0.560387  |
| C  | 2.485874  | -0.248918 | 1.429623  |
| C  | 2.837794  | 0.227846  | -0.950331 |
| N  | -0.262135 | -1.592918 | 0.150048  |
| C  | -1.717026 | -1.890641 | 0.355803  |
| C  | 0.540770  | -2.050382 | 1.330674  |
| C  | 0.172176  | -2.311548 | -1.070550 |
| C  | 2.039076  | -1.713195 | 1.303947  |
| H  | 1.753277  | 3.945474  | 1.247971  |
| H  | 1.157027  | 2.559499  | 2.174237  |
| H  | 3.375242  | 2.089180  | 1.221914  |
| H  | 2.815689  | 2.502856  | -0.384715 |
| H  | 2.462833  | -2.220704 | 2.175759  |
| H  | 2.522051  | -2.188591 | 0.448886  |
| H  | 0.087605  | -1.610778 | 2.215868  |
| H  | 0.442514  | -3.141548 | 1.400476  |
| H  | -0.871197 | 3.096222  | 2.193431  |
| H  | -0.882033 | 4.528268  | 1.161846  |
| H  | -2.497202 | 3.236860  | -0.397576 |
| H  | -3.079993 | 3.764025  | 1.149495  |
| H  | -2.590581 | 1.468464  | 2.099782  |
| H  | -3.964576 | 1.621748  | 1.001994  |
| H  | -2.614108 | -0.318181 | -1.675610 |
| H  | -4.070087 | 0.397056  | -0.953886 |
| H  | -2.771447 | 1.421830  | -1.620979 |
| H  | -2.201389 | -0.582037 | 2.002057  |
| H  | -3.575366 | -1.027381 | 0.979312  |
| H  | -2.138854 | -2.147028 | -0.614871 |
| H  | -1.829299 | -2.778879 | 0.985615  |
| H  | 1.216791  | -2.119657 | -1.287679 |
| H  | 0.035280  | -3.392528 | -0.952476 |
| H  | -0.418419 | -1.985450 | -1.925208 |
| H  | 2.691324  | -0.827819 | -1.150474 |
| H  | 2.444649  | 0.789597  | -1.793528 |
| H  | 3.913619  | 0.407093  | -0.846238 |
| H  | 1.042257  | 3.123926  | -1.527716 |
| H  | -0.640212 | 3.562036  | -1.461694 |
| H  | 0.561350  | 4.635946  | -0.703074 |

---

|   |           |           |           |
|---|-----------|-----------|-----------|
| H | 3.577962  | -0.237198 | 1.541980  |
| H | 2.047788  | 0.186166  | 2.325148  |
| O | -0.065386 | 0.893463  | -1.670605 |
| H | -0.171478 | 0.133722  | -2.249553 |

## RC

### <sup>36</sup>RC-[Fe<sup>IV</sup>=O(TMC)(SR)]<sup>+</sup>

|    |           |           |           |
|----|-----------|-----------|-----------|
| Fe | -0.236921 | 0.549801  | 0.132982  |
| O  | -0.410935 | 0.393913  | 1.775807  |
| C  | 0.483047  | 2.020353  | 6.262615  |
| H  | 0.191048  | 1.369935  | 5.437943  |
| N  | -2.388670 | 0.483743  | 0.055929  |
| C  | -3.006879 | 1.476047  | 0.987574  |
| C  | -2.640441 | -0.882487 | 0.603630  |
| C  | -3.052965 | 0.622238  | -1.268656 |
| N  | -0.055700 | 2.638449  | 0.459268  |
| C  | 1.158165  | 2.709565  | 1.332541  |
| C  | -1.183495 | 3.220729  | 1.256080  |
| C  | 0.138840  | 3.462401  | -0.764864 |
| C  | -2.583751 | 2.918580  | 0.743667  |
| N  | 1.957051  | 0.524059  | 0.384261  |
| C  | 2.311346  | 1.936837  | 0.741678  |
| C  | 2.219049  | -0.399327 | 1.534881  |
| C  | 2.881181  | 0.168506  | -0.732398 |
| N  | -0.330190 | -1.524758 | -0.118281 |
| C  | -1.785924 | -1.905514 | -0.111172 |
| C  | 0.347273  | -2.188672 | 1.048216  |
| C  | 0.262810  | -1.999690 | -1.411609 |
| C  | 1.825579  | -1.856728 | 1.276704  |
| H  | 1.453544  | 3.755948  | 1.470807  |
| H  | 0.879243  | 2.300585  | 2.299041  |
| H  | 3.153791  | 1.941051  | 1.440162  |
| H  | 2.657037  | 2.423105  | -0.168660 |
| H  | 2.109249  | -2.410700 | 2.176661  |
| H  | 2.442266  | -2.284989 | 0.485288  |
| H  | -0.223049 | -1.914535 | 1.932318  |
| H  | 0.262489  | -3.272089 | 0.904433  |
| H  | -1.095852 | 2.827529  | 2.267298  |
| H  | -1.028202 | 4.303814  | 1.303079  |
| H  | -2.711974 | 3.212139  | -0.299591 |
| H  | -3.268766 | 3.554659  | 1.310800  |
| H  | -2.724588 | 1.190958  | 1.998575  |
| H  | -4.094857 | 1.384529  | 0.898197  |
| H  | -2.696623 | -0.126990 | -1.964218 |
| H  | -4.134852 | 0.513630  | -1.140307 |
| H  | -2.832613 | 1.590232  | -1.703852 |
| H  | -2.397571 | -0.856431 | 1.662342  |
| H  | -3.698766 | -1.143730 | 0.494416  |
| H  | -2.111319 | -2.012062 | -1.142961 |
| H  | -1.905341 | -2.885377 | 0.358596  |
| H  | 2.815866  | -0.882049 | -0.983261 |
| H  | 2.622968  | 0.742748  | -1.616076 |
| H  | 3.910584  | 0.379297  | -0.425150 |
| H  | 0.952978  | 3.071522  | -1.366649 |
| H  | -0.760010 | 3.437191  | -1.374544 |
| H  | 0.356090  | 4.497988  | -0.485632 |

---

|   |           |           |           |
|---|-----------|-----------|-----------|
| H | 3.292605  | -0.368171 | 1.755723  |
| H | 1.676557  | -0.017184 | 2.394777  |
| S | -0.000928 | 0.661260  | -2.209974 |
| C | -0.149388 | -1.136898 | -2.592257 |
| H | 0.498203  | -1.365390 | -3.439595 |
| H | -1.167706 | -1.360153 | -2.916630 |
| H | 1.340906  | -1.984312 | -1.310734 |
| H | -0.030242 | -3.045598 | -1.566033 |
| H | 1.374640  | 2.585018  | 5.991269  |
| H | -0.328975 | 2.710593  | 6.487768  |
| H | 0.693853  | 1.415231  | 7.143096  |

$3\pi\text{RC}[\text{Fe}^{\text{IV}}=\text{O}(\text{TMC})(\text{SR})]^+$

|    |           |           |           |
|----|-----------|-----------|-----------|
| Fe | -0.087990 | 0.614119  | 0.119832  |
| O  | -0.058602 | 0.577368  | 1.779198  |
| C  | -0.246929 | 1.595528  | 5.727989  |
| H  | -0.171441 | 1.233290  | 4.702510  |
| N  | -2.232666 | 0.586645  | 0.314311  |
| C  | -2.716948 | 1.653841  | 1.242298  |
| C  | -2.428334 | -0.732561 | 0.984910  |
| C  | -3.056503 | 0.645190  | -0.923867 |
| N  | 0.154014  | 2.718560  | 0.268325  |
| C  | 1.466198  | 2.825782  | 0.979355  |
| C  | -0.859888 | 3.382075  | 1.149977  |
| C  | 0.205991  | 3.446257  | -1.028080 |
| C  | -2.315848 | 3.067682  | 0.840851  |
| N  | 2.119046  | 0.563671  | 0.102286  |
| C  | 2.529033  | 1.991137  | 0.309521  |
| C  | 2.510833  | -0.281396 | 1.275323  |
| C  | 2.893152  | 0.112350  | -1.090690 |
| N  | -0.235689 | -1.470525 | 0.029895  |
| C  | -1.684520 | -1.817853 | 0.239364  |
| C  | 0.570298  | -2.063386 | 1.151984  |
| C  | 0.189394  | -2.048697 | -1.287298 |
| C  | 2.069063  | -1.744559 | 1.175232  |
| H  | 1.788636  | 3.873001  | 1.005354  |
| H  | 1.303139  | 2.490972  | 1.999461  |
| H  | 3.452262  | 2.029655  | 0.896210  |
| H  | 2.763529  | 2.405085  | -0.669660 |
| H  | 2.454963  | -2.238138 | 2.072085  |
| H  | 2.578101  | -2.240340 | 0.347826  |
| H  | 0.114076  | -1.716434 | 2.075754  |
| H  | 0.457544  | -3.152615 | 1.098802  |
| H  | -0.650802 | 3.069842  | 2.171125  |
| H  | -0.690198 | 4.462536  | 1.090025  |
| H  | -2.571502 | 3.287407  | -0.197148 |
| H  | -2.918776 | 3.755132  | 1.440393  |
| H  | -2.310297 | 1.435382  | 2.227288  |
| H  | -3.808124 | 1.576843  | 1.299502  |
| H  | -2.797104 | -0.156931 | -1.603137 |
| H  | -4.114723 | 0.566561  | -0.654701 |
| H  | -2.882606 | 1.576292  | -1.451467 |
| H  | -2.050792 | -0.639006 | 1.999375  |
| H  | -3.494904 | -0.979099 | 1.031055  |
| H  | -2.136007 | -1.980721 | -0.736352 |
| H  | -1.759080 | -2.763553 | 0.782404  |
| H  | 2.784073  | -0.951563 | -1.256693 |

---

|   |           |           |           |
|---|-----------|-----------|-----------|
| H | 2.534985  | 0.628889  | -1.975111 |
| H | 3.955282  | 0.322332  | -0.927646 |
| H | 0.934538  | 2.995684  | -1.694720 |
| H | -0.761682 | 3.395933  | -1.519292 |
| H | 0.468194  | 4.494580  | -0.855917 |
| H | 3.604404  | -0.259230 | 1.357697  |
| H | 2.086145  | 0.173576  | 2.165205  |
| S | -0.144385 | 0.554966  | -2.236072 |
| C | -0.350657 | -1.263224 | -2.470774 |
| H | 0.192396  | -1.559957 | -3.368754 |
| H | -1.401565 | -1.491181 | -2.659670 |
| H | 1.271939  | -2.051852 | -1.317879 |
| H | -0.135548 | -3.096033 | -1.328596 |
| H | 0.749317  | 1.682872  | 6.160122  |
| H | -0.731325 | 2.571724  | 5.741998  |
| H | -0.834746 | 0.895286  | 6.320248  |

$5^{\sigma}\text{RC}[\text{Fe}^{\text{IV}}=\text{O}(\text{TMC})(\text{SR})]^+$

|    |           |           |           |
|----|-----------|-----------|-----------|
| Fe | -0.167067 | 0.602017  | 0.129990  |
| O  | -0.226555 | 0.494022  | 1.789022  |
| C  | -0.231412 | 1.354325  | 6.147544  |
| H  | -0.246683 | 1.029542  | 5.106862  |
| N  | -2.429565 | 0.498125  | 0.210909  |
| C  | -2.900405 | 1.569623  | 1.136827  |
| C  | -2.563381 | -0.840125 | 0.845030  |
| C  | -3.214476 | 0.560189  | -1.042446 |
| N  | 0.123050  | 2.744423  | 0.390345  |
| C  | 1.378969  | 2.778658  | 1.204035  |
| C  | -0.988479 | 3.310768  | 1.225188  |
| C  | 0.274480  | 3.547525  | -0.848237 |
| C  | -2.413404 | 2.977863  | 0.775674  |
| N  | 2.179759  | 0.560994  | 0.250990  |
| C  | 2.515956  | 1.976262  | 0.586168  |
| C  | 2.448986  | -0.362621 | 1.392892  |
| C  | 3.020968  | 0.189244  | -0.912432 |
| N  | -0.284529 | -1.551515 | -0.041764 |
| C  | -1.739156 | -1.897799 | 0.112966  |
| C  | 0.504424  | -2.154479 | 1.085483  |
| C  | 0.200230  | -2.038471 | -1.370492 |
| C  | 2.002142  | -1.815901 | 1.167055  |
| H  | 1.710996  | 3.817378  | 1.318718  |
| H  | 1.130502  | 2.391882  | 2.188096  |
| H  | 3.372836  | 2.008777  | 1.268566  |
| H  | 2.838891  | 2.456691  | -0.336366 |
| H  | 2.364232  | -2.373274 | 2.036457  |
| H  | 2.538264  | -2.251256 | 0.322834  |
| H  | 0.016408  | -1.838797 | 2.005055  |
| H  | 0.413256  | -3.245038 | 1.007973  |
| H  | -0.848180 | 2.937388  | 2.237834  |
| H  | -0.859863 | 4.398648  | 1.250201  |
| H  | -2.560092 | 3.191800  | -0.285238 |
| H  | -3.066672 | 3.679386  | 1.301449  |
| H  | -2.548819 | 1.317251  | 2.135171  |
| H  | -3.996757 | 1.556446  | 1.152262  |
| H  | -2.901933 | -0.213506 | -1.735383 |
| H  | -4.280382 | 0.434023  | -0.821351 |
| H  | -3.060262 | 1.513367  | -1.539028 |

---

|   |           |           |           |
|---|-----------|-----------|-----------|
| H | -2.229411 | -0.750369 | 1.875222  |
| H | -3.612064 | -1.161103 | 0.850072  |
| H | -2.149731 | -2.058792 | -0.881473 |
| H | -1.829240 | -2.848799 | 0.645413  |
| H | 2.893052  | -0.855553 | -1.171448 |
| H | 2.732587  | 0.780281  | -1.777393 |
| H | 4.079718  | 0.355617  | -0.681781 |
| H | 1.053427  | 3.131981  | -1.481166 |
| H | -0.652946 | 3.533101  | -1.415432 |
| H | 0.525203  | 4.583367  | -0.597253 |
| H | 3.529454  | -0.369539 | 1.589624  |
| H | 1.945235  | 0.041060  | 2.267626  |
| S | -0.091614 | 0.619243  | -2.202611 |
| C | -0.313252 | -1.189080 | -2.521195 |
| H | 0.244397  | -1.438312 | -3.424738 |
| H | -1.362705 | -1.391924 | -2.738638 |
| H | 1.284338  | -2.006556 | -1.359782 |
| H | -0.092473 | -3.088600 | -1.499698 |
| H | 0.644567  | 1.977420  | 6.325590  |
| H | -1.132081 | 1.926746  | 6.366908  |
| H | -0.191682 | 0.483305  | 6.800055  |

$5\pi\text{RC}[\text{Fe}^{\text{IV}}=\text{O}(\text{TMC})(\text{SR})]^+$

|    |           |           |           |
|----|-----------|-----------|-----------|
| Fe | -0.111768 | 0.667323  | 0.112303  |
| O  | -0.094358 | 0.681047  | 1.775865  |
| C  | -0.226556 | 1.219985  | 5.627148  |
| H  | -0.168864 | 1.039888  | 4.553232  |
| N  | -2.368884 | 0.606356  | 0.301306  |
| C  | -2.786941 | 1.750258  | 1.163561  |
| C  | -2.490545 | -0.679229 | 1.038988  |
| C  | -3.209910 | 0.587356  | -0.917078 |
| N  | 0.209696  | 2.820210  | 0.200603  |
| C  | 1.497396  | 2.895210  | 0.959505  |
| C  | -0.858525 | 3.467467  | 1.033328  |
| C  | 0.319583  | 3.524084  | -1.100504 |
| C  | -2.305099 | 3.120581  | 0.673437  |
| N  | 2.231455  | 0.605576  | 0.133130  |
| C  | 2.599964  | 2.035400  | 0.357034  |
| C  | 2.550887  | -0.246685 | 1.316530  |
| C  | 3.009554  | 0.145721  | -1.043127 |
| N  | -0.265573 | -1.491804 | 0.100907  |
| C  | -1.715193 | -1.801514 | 0.350591  |
| C  | 0.570328  | -2.023315 | 1.230462  |
| C  | 0.147033  | -2.083622 | -1.209546 |
| C  | 2.074452  | -1.704109 | 1.211313  |
| H  | 1.845041  | 3.934749  | 0.987983  |
| H  | 1.283538  | 2.579321  | 1.976271  |
| H  | 3.481965  | 2.100632  | 1.004028  |
| H  | 2.894746  | 2.446689  | -0.607331 |
| H  | 2.475676  | -2.208628 | 2.095561  |
| H  | 2.559155  | -2.202327 | 0.370846  |
| H  | 0.133023  | -1.632612 | 2.146770  |
| H  | 0.461488  | -3.114948 | 1.239559  |
| H  | -0.679904 | 3.174767  | 2.066034  |
| H  | -0.716168 | 4.551818  | 0.964902  |
| H  | -2.496482 | 3.254699  | -0.393501 |
| H  | -2.927642 | 3.868892  | 1.171226  |

---

|   |           |           |           |
|---|-----------|-----------|-----------|
| H | -2.392860 | 1.572404  | 2.162330  |
| H | -3.881435 | 1.750957  | 1.229779  |
| H | -2.938365 | -0.240111 | -1.563286 |
| H | -4.265969 | 0.494005  | -0.639574 |
| H | -3.068039 | 1.498862  | -1.489971 |
| H | -2.110045 | -0.517794 | 2.043921  |
| H | -3.542027 | -0.982124 | 1.114662  |
| H | -2.175459 | -2.029903 | -0.608201 |
| H | -1.790939 | -2.708146 | 0.957219  |
| H | 2.850157  | -0.910204 | -1.230836 |
| H | 2.690586  | 0.687569  | -1.929012 |
| H | 4.080837  | 0.304267  | -0.872138 |
| H | 1.066533  | 3.050040  | -1.730990 |
| H | -0.630669 | 3.480076  | -1.627197 |
| H | 0.592337  | 4.572276  | -0.940510 |
| H | 3.640920  | -0.258420 | 1.451500  |
| H | 2.105965  | 0.215955  | 2.193853  |
| S | -0.145413 | 0.511497  | -2.216832 |
| C | -0.407944 | -1.311028 | -2.394471 |
| H | 0.103523  | -1.633584 | -3.301959 |
| H | -1.469222 | -1.510375 | -2.548763 |
| H | 1.230761  | -2.071585 | -1.252494 |
| H | -0.167784 | -3.134794 | -1.246583 |
| H | 0.619239  | 1.829182  | 5.944852  |
| H | -1.153508 | 1.741059  | 5.865388  |
| H | -0.203381 | 0.269875  | 6.159555  |

<sup>36</sup>RC-[Fe<sup>IV</sup>=O(TMC)(OH)]<sup>+</sup>

|    |           |           |           |
|----|-----------|-----------|-----------|
| Fe | -0.201082 | 0.725841  | 0.044501  |
| O  | -0.468346 | 0.911753  | 1.666773  |
| C  | -1.211772 | 1.549590  | 5.432099  |
| H  | -1.018738 | 1.382288  | 4.371913  |
| N  | -2.315216 | 0.649623  | -0.176756 |
| C  | -3.022872 | 1.807051  | 0.450466  |
| C  | -2.646598 | -0.567471 | 0.625091  |
| C  | -2.795996 | 0.486881  | -1.572791 |
| N  | -0.021807 | 2.843890  | -0.045953 |
| C  | 1.159949  | 3.071386  | 0.840897  |
| C  | -1.183472 | 3.563173  | 0.560055  |
| C  | 0.242797  | 3.401077  | -1.397698 |
| C  | -2.546382 | 3.181066  | -0.001323 |
| N  | 1.913647  | 0.724282  | 0.370642  |
| C  | 2.305925  | 2.171619  | 0.443837  |
| C  | 2.173127  | 0.051670  | 1.684421  |
| C  | 2.771308  | 0.125333  | -0.691556 |
| N  | -0.310796 | -1.405506 | 0.246230  |
| C  | -1.776355 | -1.731633 | 0.214982  |
| C  | 0.271307  | -1.766951 | 1.579181  |
| C  | 0.311044  | -2.234520 | -0.825916 |
| C  | 1.752158  | -1.418953 | 1.764284  |
| H  | 1.476804  | 4.118713  | 0.779860  |
| H  | 0.840083  | 2.864379  | 1.857828  |
| H  | 3.136103  | 2.293258  | 1.145838  |
| H  | 2.679251  | 2.456916  | -0.537465 |
| H  | 2.012373  | -1.748685 | 2.774022  |
| H  | 2.372990  | -2.029326 | 1.106602  |
| H  | -0.319030 | -1.260314 | 2.338360  |



---

|   |           |           |           |
|---|-----------|-----------|-----------|
| H | 0.156356  | -2.849231 | 1.713285  |
| H | -1.173777 | 3.344320  | 1.626419  |
| H | -1.015248 | 4.638294  | 0.432686  |
| H | -2.588113 | 3.292648  | -1.087212 |
| H | -3.264453 | 3.908121  | 0.387497  |
| H | -2.877158 | 1.725208  | 1.526089  |
| H | -4.093376 | 1.696841  | 0.244136  |
| H | -2.257766 | -0.310047 | -2.073392 |
| H | -3.869053 | 0.270108  | -1.573940 |
| H | -2.630732 | 1.404571  | -2.132211 |
| H | -2.486188 | -0.314420 | 1.668985  |
| H | -3.701214 | -0.830773 | 0.486268  |
| H | -2.019273 | -2.037848 | -0.800330 |
| H | -1.976490 | -2.592258 | 0.860534  |
| H | 1.387825  | -2.260723 | -0.723576 |
| H | -0.057272 | -3.261807 | -0.751103 |
| H | 0.068288  | -1.801553 | -1.791487 |
| H | 2.725334  | -0.955264 | -0.667247 |
| H | 2.414953  | 0.459310  | -1.660922 |
| H | 3.811540  | 0.422722  | -0.529514 |
| H | 1.042338  | 2.856727  | -1.887235 |
| H | -0.646794 | 3.315814  | -2.017051 |
| H | 0.507323  | 4.460067  | -1.317119 |
| H | 3.250193  | 0.108830  | 1.882698  |
| H | 1.650625  | 0.621007  | 2.448899  |
| O | 0.127176  | 0.491415  | -1.803492 |
| H | -0.349144 | 1.017447  | -2.449755 |
| H | -0.440719 | 2.196850  | 5.849157  |
| H | -2.184837 | 2.022929  | 5.560955  |
| H | -1.204533 | 0.597200  | 5.961226  |

$3\pi\text{RC-}[\text{Fe}^{\text{IV}}=\text{O}(\text{TMC})(\text{OH})]^+$

|    |           |           |           |
|----|-----------|-----------|-----------|
| Fe | -0.143005 | 0.737533  | 0.042233  |
| O  | -0.358076 | 0.919697  | 1.672423  |
| C  | -1.990610 | 1.195629  | 5.293341  |
| H  | -1.461094 | 1.157563  | 4.341079  |
| N  | -2.263368 | 0.689839  | -0.113156 |
| C  | -2.936169 | 1.851813  | 0.543223  |
| C  | -2.586766 | -0.528490 | 0.690034  |
| C  | -2.788455 | 0.542876  | -1.494884 |
| N  | 0.061051  | 2.853103  | -0.043125 |
| C  | 1.275116  | 3.060622  | 0.803702  |
| C  | -1.069932 | 3.583388  | 0.605803  |
| C  | 0.286808  | 3.414236  | -1.400218 |
| C  | -2.455816 | 3.223187  | 0.087583  |
| N  | 1.981567  | 0.706807  | 0.301696  |
| C  | 2.394940  | 2.148544  | 0.362487  |
| C  | 2.270356  | 0.030520  | 1.607298  |
| C  | 2.798685  | 0.096864  | -0.785718 |
| N  | -0.272453 | -1.392646 | 0.240670  |
| C  | -1.742065 | -1.700220 | 0.248981  |
| C  | 0.342551  | -1.764180 | 1.555710  |
| C  | 0.308206  | -2.226645 | -0.850848 |
| C  | 1.832322  | -1.434578 | 1.699124  |
| H  | 1.602116  | 4.104546  | 0.738821  |
| H  | 0.989219  | 2.848816  | 1.829617  |
| H  | 3.252171  | 2.258339  | 1.033399  |

|   |           |           |           |
|---|-----------|-----------|-----------|
| H | 2.735289  | 2.431031  | -0.631532 |
| H | 2.116698  | -1.768106 | 2.701072  |
| H | 2.426696  | -2.052513 | 1.024270  |
| H | -0.219565 | -1.251190 | 2.331596  |
| H | 0.217972  | -2.845177 | 1.691351  |
| H | -1.026200 | 3.357126  | 1.669566  |
| H | -0.891682 | 4.656993  | 0.479360  |
| H | -2.532379 | 3.344998  | -0.995306 |
| H | -3.150797 | 3.956061  | 0.506216  |
| H | -2.760841 | 1.758556  | 1.613297  |
| H | -4.013740 | 1.757640  | 0.367578  |
| H | -2.276070 | -0.257603 | -2.016430 |
| H | -3.863818 | 0.340161  | -1.464958 |
| H | -2.628138 | 1.462032  | -2.053414 |
| H | -2.397451 | -0.284215 | 1.730929  |
| H | -3.647716 | -0.778754 | 0.577421  |
| H | -2.016820 | -1.996442 | -0.761185 |
| H | -1.934606 | -2.562809 | 0.894177  |
| H | 1.386585  | -2.271544 | -0.776167 |
| H | -0.074789 | -3.248181 | -0.771374 |
| H | 0.047601  | -1.785093 | -1.807893 |
| H | 2.741635  | -0.983110 | -0.757947 |
| H | 2.416437  | 0.433898  | -1.744159 |
| H | 3.846795  | 0.382760  | -0.656951 |
| H | 1.062136  | 2.862225  | -1.919207 |
| H | -0.624248 | 3.343436  | -1.989440 |
| H | 0.567671  | 4.469342  | -1.323904 |
| H | 3.353320  | 0.073460  | 1.774961  |
| H | 1.776483  | 0.608082  | 2.384294  |
| O | 0.125031  | 0.506445  | -1.815915 |
| H | -0.359930 | 1.044290  | -2.445831 |
| H | -1.706415 | 2.097613  | 5.834117  |
| H | -3.066579 | 1.205028  | 5.120253  |
| H | -1.731426 | 0.322570  | 5.891391  |

$5\sigma$ RC-[Fe<sup>IV</sup>=O(TMC)(OH)]<sup>+</sup>

|    |           |           |           |
|----|-----------|-----------|-----------|
| Fe | -0.143354 | 0.608412  | 0.157946  |
| O  | -0.228879 | 0.465817  | 1.801196  |
| C  | -0.132024 | 1.426804  | 5.762192  |
| H  | -0.204106 | 1.048940  | 4.742114  |
| N  | -2.338916 | 0.447860  | 0.174260  |
| C  | -2.907000 | 1.515338  | 1.053999  |
| C  | -2.534674 | -0.879643 | 0.817639  |
| C  | -2.978627 | 0.499565  | -1.158723 |
| N  | 0.105797  | 2.769631  | 0.484610  |
| C  | 1.348827  | 2.781227  | 1.305519  |
| C  | -1.036494 | 3.294605  | 1.291415  |
| C  | 0.271763  | 3.579412  | -0.745162 |
| C  | -2.429379 | 2.941120  | 0.759744  |
| N  | 2.104803  | 0.568518  | 0.289522  |
| C  | 2.471745  | 1.974160  | 0.661920  |
| C  | 2.453397  | -0.387439 | 1.383875  |
| C  | 2.842528  | 0.239932  | -0.954037 |
| N  | -0.263555 | -1.663405 | -0.020909 |
| C  | -1.720792 | -1.977942 | 0.140897  |
| C  | 0.522663  | -2.189649 | 1.141493  |
| C  | 0.193466  | -2.305757 | -1.275469 |

---

|   |           |           |           |
|---|-----------|-----------|-----------|
| C | 2.019107  | -1.843796 | 1.158891  |
| H | 1.700245  | 3.811331  | 1.441524  |
| H | 1.097721  | 2.375728  | 2.281597  |
| H | 3.330568  | 1.962977  | 1.340297  |
| H | 2.799831  | 2.473708  | -0.247842 |
| H | 2.433297  | -2.402600 | 2.003568  |
| H | 2.518165  | -2.261809 | 0.283282  |
| H | 0.053592  | -1.808044 | 2.044991  |
| H | 0.429693  | -3.283609 | 1.142068  |
| H | -0.930262 | 2.899463  | 2.300568  |
| H | -0.938223 | 4.384876  | 1.349996  |
| H | -2.523480 | 3.182600  | -0.300977 |
| H | -3.130402 | 3.608544  | 1.268114  |
| H | -2.643900 | 1.262124  | 2.079183  |
| H | -3.999547 | 1.475362  | 0.969348  |
| H | -2.579567 | -0.275570 | -1.806091 |
| H | -4.061778 | 0.364824  | -1.062736 |
| H | -2.768549 | 1.451731  | -1.635848 |
| H | -2.240138 | -0.778837 | 1.858593  |
| H | -3.593281 | -1.164196 | 0.785215  |
| H | -2.125117 | -2.172360 | -0.851435 |
| H | -1.839716 | -2.905356 | 0.710301  |
| H | 1.242714  | -2.103383 | -1.460127 |
| H | 0.055174  | -3.391996 | -1.226916 |
| H | -0.381635 | -1.927715 | -2.119027 |
| H | 2.698327  | -0.799138 | -1.227899 |
| H | 2.469861  | 0.860099  | -1.765228 |
| H | 3.916263  | 0.408598  | -0.816866 |
| H | 1.035975  | 3.151113  | -1.383964 |
| H | -0.650277 | 3.576631  | -1.318818 |
| H | 0.533475  | 4.609327  | -0.479275 |
| H | 3.543268  | -0.376207 | 1.515284  |
| H | 1.997746  | -0.012938 | 2.297787  |
| O | -0.067012 | 0.925854  | -1.681663 |
| H | -0.032501 | 0.187934  | -2.296554 |
| H | -0.537260 | 2.437230  | 5.812081  |
| H | -0.699286 | 0.780366  | 6.430533  |
| H | 0.910871  | 1.441687  | 6.077291  |

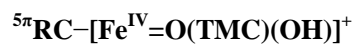

|    |           |           |           |
|----|-----------|-----------|-----------|
| Fe | -0.216165 | 0.727766  | 0.000481  |
| O  | -0.499529 | 0.870657  | 1.620905  |
| C  | -1.296363 | 1.497724  | 5.383778  |
| H  | -1.084952 | 1.326136  | 4.327748  |
| N  | -2.414621 | 0.604453  | -0.232570 |
| C  | -3.067809 | 1.789249  | 0.402096  |
| C  | -2.692648 | -0.614841 | 0.580922  |
| C  | -2.909914 | 0.434354  | -1.617038 |
| N  | 0.015046  | 2.930926  | -0.009402 |
| C  | 1.162115  | 3.072945  | 0.934108  |
| C  | -1.198168 | 3.576839  | 0.576820  |
| C  | 0.334875  | 3.542775  | -1.319157 |
| C  | -2.533815 | 3.154447  | -0.043353 |
| N  | 1.990082  | 0.723388  | 0.402754  |
| C  | 2.334850  | 2.172244  | 0.561451  |
| C  | 2.188423  | -0.024675 | 1.682235  |
| C  | 2.858982  | 0.180111  | -0.671249 |

---

|   |           |           |           |
|---|-----------|-----------|-----------|
| N | -0.340377 | -1.509520 | 0.188432  |
| C | -1.810982 | -1.793242 | 0.181074  |
| C | 0.273351  | -1.859105 | 1.506291  |
| C | 0.265525  | -2.305556 | -0.908040 |
| C | 1.759450  | -1.500193 | 1.670177  |
| H | 1.513234  | 4.111930  | 0.942606  |
| H | 0.794427  | 2.829140  | 1.926602  |
| H | 3.117563  | 2.284870  | 1.318497  |
| H | 2.763465  | 2.506534  | -0.381559 |
| H | 2.044766  | -1.891538 | 2.650979  |
| H | 2.367585  | -2.066237 | 0.962888  |
| H | -0.305357 | -1.356451 | 2.278244  |
| H | 0.171449  | -2.942006 | 1.654785  |
| H | -1.213726 | 3.332595  | 1.637842  |
| H | -1.083620 | 4.663601  | 0.486357  |
| H | -2.514707 | 3.241505  | -1.132684 |
| H | -3.271265 | 3.892750  | 0.283340  |
| H | -2.930942 | 1.696249  | 1.478167  |
| H | -4.143653 | 1.735734  | 0.196632  |
| H | -2.368999 | -0.359921 | -2.122490 |
| H | -3.980986 | 0.203602  | -1.613059 |
| H | -2.760092 | 1.351856  | -2.182781 |
| H | -2.526113 | -0.351618 | 1.621450  |
| H | -3.741577 | -0.911708 | 0.463209  |
| H | -2.071503 | -2.117371 | -0.824834 |
| H | -2.029138 | -2.635501 | 0.846275  |
| H | 1.347475  | -2.259521 | -0.866550 |
| H | -0.034517 | -3.355629 | -0.823856 |
| H | -0.046785 | -1.894186 | -1.863739 |
| H | 2.744393  | -0.894007 | -0.754917 |
| H | 2.566717  | 0.616666  | -1.621922 |
| H | 3.910100  | 0.398030  | -0.453378 |
| H | 1.146494  | 3.008157  | -1.802789 |
| H | -0.531295 | 3.494007  | -1.975939 |
| H | 0.611240  | 4.594872  | -1.189824 |
| H | 3.255632  | 0.012050  | 1.936789  |
| H | 1.637691  | 0.503624  | 2.457595  |
| O | 0.134233  | 0.543606  | -1.830076 |
| H | -0.362934 | 1.058544  | -2.471520 |
| H | -0.368457 | 1.464648  | 5.953708  |
| H | -1.762250 | 2.474146  | 5.514020  |
| H | -1.971470 | 0.726265  | 5.752976  |

### TS<sub>H</sub>

#### <sup>36</sup>TS<sub>H</sub>-[Fe<sup>IV</sup>=O(TMC)(SR)]<sup>+</sup>

|    |           |           |           |
|----|-----------|-----------|-----------|
| Fe | -0.207345 | 0.662563  | 0.326034  |
| O  | -0.571993 | 0.584820  | 2.086177  |
| C  | 0.290382  | 0.985385  | 4.413419  |
| H  | -0.066856 | 0.800727  | 3.164558  |
| N  | -2.581734 | 0.573570  | 0.290818  |
| C  | -3.077057 | 1.703714  | 1.115977  |
| C  | -2.729838 | -0.735790 | 0.964500  |
| C  | -3.294148 | 0.572430  | -1.000307 |
| N  | 0.070503  | 2.763441  | 0.475337  |
| C  | 1.295422  | 2.868663  | 1.329188  |
| C  | -1.082715 | 3.380455  | 1.221711  |

|                                                                                                  |           |           |           |
|--------------------------------------------------------------------------------------------------|-----------|-----------|-----------|
| C                                                                                                | 0.272058  | 3.504335  | -0.796057 |
| C                                                                                                | -2.493337 | 3.065314  | 0.710717  |
| N                                                                                                | 2.175110  | 0.630533  | 0.503623  |
| C                                                                                                | 2.479256  | 2.054474  | 0.811605  |
| C                                                                                                | 2.393475  | -0.270630 | 1.666197  |
| C                                                                                                | 3.050472  | 0.226685  | -0.619270 |
| N                                                                                                | -0.362236 | -1.447840 | 0.224683  |
| C                                                                                                | -1.826329 | -1.803916 | 0.338484  |
| C                                                                                                | 0.399852  | -2.032296 | 1.379930  |
| C                                                                                                | 0.164110  | -1.993084 | -1.068328 |
| C                                                                                                | 1.904652  | -1.717369 | 1.475009  |
| H                                                                                                | 1.604139  | 3.918921  | 1.399173  |
| H                                                                                                | 1.016555  | 2.542606  | 2.324956  |
| H                                                                                                | 3.293107  | 2.130328  | 1.543567  |
| H                                                                                                | 2.853038  | 2.510087  | -0.104229 |
| H                                                                                                | 2.243668  | -2.262525 | 2.361690  |
| H                                                                                                | 2.442969  | -2.185454 | 0.650073  |
| H                                                                                                | -0.103991 | -1.692123 | 2.280427  |
| H                                                                                                | 0.297855  | -3.123409 | 1.326029  |
| H                                                                                                | -1.005568 | 3.052291  | 2.255119  |
| H                                                                                                | -0.931193 | 4.465781  | 1.203393  |
| H                                                                                                | -2.565608 | 3.216990  | -0.368577 |
| H                                                                                                | -3.142638 | 3.829087  | 1.148292  |
| H                                                                                                | -2.820717 | 1.500636  | 2.153066  |
| H                                                                                                | -4.171894 | 1.751996  | 1.045127  |
| H                                                                                                | -2.947697 | -0.234949 | -1.637463 |
| H                                                                                                | -4.373637 | 0.454948  | -0.839463 |
| H                                                                                                | -3.114243 | 1.499785  | -1.537145 |
| H                                                                                                | -2.482155 | -0.602357 | 2.012701  |
| H                                                                                                | -3.763674 | -1.102667 | 0.900116  |
| H                                                                                                | -2.182789 | -2.029928 | -0.663886 |
| H                                                                                                | -1.921760 | -2.727566 | 0.916066  |
| H                                                                                                | 2.915476  | -0.822267 | -0.861838 |
| H                                                                                                | 2.798844  | 0.801667  | -1.506835 |
| H                                                                                                | 4.106245  | 0.382866  | -0.364007 |
| H                                                                                                | 1.085441  | 3.068529  | -1.368691 |
| H                                                                                                | -0.627011 | 3.451580  | -1.404238 |
| H                                                                                                | 0.501198  | 4.553449  | -0.582909 |
| H                                                                                                | 3.468939  | -0.312347 | 1.892735  |
| H                                                                                                | 1.900790  | 0.167057  | 2.528493  |
| S                                                                                                | -0.112739 | 0.611721  | -1.977710 |
| C                                                                                                | -0.319515 | -1.198291 | -2.265219 |
| H                                                                                                | 0.269999  | -1.467677 | -3.142758 |
| H                                                                                                | -1.360629 | -1.410607 | -2.508750 |
| H                                                                                                | 1.246894  | -1.947308 | -1.030651 |
| H                                                                                                | -0.116892 | -3.050805 | -1.154003 |
| H                                                                                                | 1.266636  | 1.461182  | 4.432728  |
| H                                                                                                | -0.506898 | 1.612729  | 4.801521  |
| H                                                                                                | 0.288512  | -0.019793 | 4.824407  |
| ${}^{3\pi}\text{TS}_{\text{H}}\text{-}[\text{Fe}^{\text{IV}}=\text{O}(\text{TMC})(\text{SR})]^+$ |           |           |           |
| Fe                                                                                               | -0.120773 | 0.635853  | 0.267821  |
| O                                                                                                | -0.223724 | 0.431006  | 2.074315  |
| C                                                                                                | 0.222647  | 1.529442  | 4.319129  |
| H                                                                                                | 0.004857  | 1.038694  | 3.021855  |
| N                                                                                                | -2.283544 | 0.587738  | 0.382456  |
| C                                                                                                | -2.803234 | 1.662368  | 1.280538  |

|   |           |           |           |
|---|-----------|-----------|-----------|
| C | -2.513035 | -0.731760 | 1.043097  |
| C | -3.060848 | 0.642457  | -0.885310 |
| N | 0.112925  | 2.732866  | 0.432914  |
| C | 1.396276  | 2.860444  | 1.187913  |
| C | -0.947143 | 3.410962  | 1.247668  |
| C | 0.222545  | 3.451594  | -0.865840 |
| C | -2.385818 | 3.073625  | 0.879906  |
| N | 2.081783  | 0.596481  | 0.324579  |
| C | 2.493226  | 2.016125  | 0.581077  |
| C | 2.454042  | -0.290854 | 1.475759  |
| C | 2.884782  | 0.172290  | -0.860535 |
| N | -0.272885 | -1.468309 | 0.167010  |
| C | -1.725430 | -1.821171 | 0.345115  |
| C | 0.524004  | -2.090216 | 1.277634  |
| C | 0.167883  | -2.029799 | -1.151523 |
| C | 2.019923  | -1.753532 | 1.324576  |
| H | 1.717424  | 3.908950  | 1.204424  |
| H | 1.205786  | 2.557035  | 2.210410  |
| H | 3.374828  | 2.039198  | 1.229311  |
| H | 2.798326  | 2.441807  | -0.373003 |
| H | 2.404724  | -2.271409 | 2.208436  |
| H | 2.543287  | -2.216540 | 0.487205  |
| H | 0.056048  | -1.776862 | 2.205974  |
| H | 0.427334  | -3.179033 | 1.188014  |
| H | -0.785882 | 3.135535  | 2.286129  |
| H | -0.788062 | 4.491947  | 1.167131  |
| H | -2.594270 | 3.275916  | -0.172123 |
| H | -3.020013 | 3.767553  | 1.438559  |
| H | -2.439062 | 1.450076  | 2.282587  |
| H | -3.896526 | 1.590926  | 1.295515  |
| H | -2.790383 | -0.174780 | -1.542131 |
| H | -4.129633 | 0.578979  | -0.656182 |
| H | -2.857031 | 1.563706  | -1.419504 |
| H | -2.192364 | -0.636148 | 2.075006  |
| H | -3.579780 | -0.982606 | 1.024048  |
| H | -2.146898 | -2.012277 | -0.639303 |
| H | -1.810551 | -2.755532 | 0.906287  |
| H | 2.734327  | -0.875005 | -1.086991 |
| H | 2.587464  | 0.745859  | -1.731518 |
| H | 3.947521  | 0.327988  | -0.647120 |
| H | 0.985149  | 3.001830  | -1.493603 |
| H | -0.719630 | 3.393122  | -1.403445 |
| H | 0.471598  | 4.502607  | -0.688840 |
| H | 3.546550  | -0.270880 | 1.574602  |
| H | 2.020392  | 0.129597  | 2.375678  |
| S | -0.096382 | 0.586189  | -2.029010 |
| C | -0.342362 | -1.215220 | -2.326937 |
| H | 0.211087  | -1.492743 | -3.224728 |
| H | -1.393641 | -1.419784 | -2.537723 |
| H | 1.251389  | -2.043868 | -1.166635 |
| H | -0.165472 | -3.073010 | -1.220291 |
| H | 1.299673  | 1.537316  | 4.461970  |
| H | -0.236296 | 2.510501  | 4.395647  |
| H | -0.286765 | 0.761953  | 4.893570  |

<sup>56</sup>TS<sub>H</sub><sup>-</sup>[Fe<sup>IV</sup>=O(TMC)(SR)]<sup>+</sup>

|    |           |          |          |
|----|-----------|----------|----------|
| Fe | -0.147923 | 0.675182 | 0.264216 |
|----|-----------|----------|----------|

---

|   |           |           |           |
|---|-----------|-----------|-----------|
| O | -0.220447 | 0.639507  | 2.069265  |
| C | -0.273537 | 0.593085  | 4.601409  |
| H | -0.246807 | 0.606795  | 3.215041  |
| N | -2.423213 | 0.572684  | 0.388656  |
| C | -2.889422 | 1.698753  | 1.248727  |
| C | -2.559450 | -0.734790 | 1.087876  |
| C | -3.212827 | 0.568489  | -0.863442 |
| N | 0.143168  | 2.865510  | 0.453962  |
| C | 1.394056  | 2.924265  | 1.270216  |
| C | -0.979270 | 3.468890  | 1.241551  |
| C | 0.308147  | 3.597641  | -0.824403 |
| C | -2.398398 | 3.085217  | 0.805160  |
| N | 2.179727  | 0.654839  | 0.397158  |
| C | 2.529435  | 2.078755  | 0.700952  |
| C | 2.480206  | -0.256027 | 1.542817  |
| C | 2.992398  | 0.256081  | -0.779379 |
| N | -0.291284 | -1.531366 | 0.205791  |
| C | -1.746780 | -1.843370 | 0.411598  |
| C | 0.531675  | -2.082402 | 1.330169  |
| C | 0.154723  | -2.077938 | -1.108361 |
| C | 2.028016  | -1.716584 | 1.359782  |
| H | 1.742997  | 3.962154  | 1.341520  |
| H | 1.136664  | 2.581895  | 2.266961  |
| H | 3.372680  | 2.118379  | 1.399324  |
| H | 2.879954  | 2.526404  | -0.227716 |
| H | 2.426519  | -2.253290 | 2.226426  |
| H | 2.541811  | -2.162156 | 0.507340  |
| H | 0.061162  | -1.746850 | 2.250205  |
| H | 0.464020  | -3.177611 | 1.295893  |
| H | -0.841786 | 3.168628  | 2.278207  |
| H | -0.873640 | 4.559183  | 1.195368  |
| H | -2.533488 | 3.227155  | -0.269547 |
| H | -3.064020 | 3.815435  | 1.273261  |
| H | -2.544313 | 1.505477  | 2.261558  |
| H | -3.986160 | 1.695441  | 1.261401  |
| H | -2.904553 | -0.243373 | -1.512851 |
| H | -4.278892 | 0.458325  | -0.633321 |
| H | -3.057193 | 1.491896  | -1.413413 |
| H | -2.222920 | -0.595053 | 2.110110  |
| H | -3.610334 | -1.049817 | 1.111489  |
| H | -2.176403 | -2.063627 | -0.563596 |
| H | -1.843624 | -2.757729 | 1.004861  |
| H | 2.823923  | -0.783846 | -1.035308 |
| H | 2.708700  | 0.852184  | -1.641876 |
| H | 4.059101  | 0.390965  | -0.565057 |
| H | 1.083799  | 3.138572  | -1.431478 |
| H | -0.616991 | 3.560592  | -1.395180 |
| H | 0.569237  | 4.644419  | -0.634554 |
| H | 3.567155  | -0.265738 | 1.700919  |
| H | 2.013714  | 0.164371  | 2.428376  |
| S | -0.111504 | 0.545353  | -2.100428 |
| C | -0.360522 | -1.276357 | -2.296882 |
| H | 0.174114  | -1.594782 | -3.192178 |
| H | -1.417563 | -1.470102 | -2.486086 |
| H | 1.240206  | -2.066652 | -1.121064 |
| H | -0.156991 | -3.127696 | -1.192240 |
| H | 0.625766  | 1.129315  | 4.888354  |

---

|                                                                       |           |           |           |
|-----------------------------------------------------------------------|-----------|-----------|-----------|
| H                                                                     | -1.197478 | 1.104553  | 4.852549  |
| H                                                                     | -0.264283 | -0.461907 | 4.856658  |
| $5\pi r$ TS <sub>H</sub> -[Fe <sup>IV</sup> =O(TMC)(SR)] <sup>+</sup> |           |           |           |
| Fe                                                                    | -0.125032 | 0.648296  | 0.260943  |
| O                                                                     | -0.158218 | 0.419604  | 2.065625  |
| C                                                                     | -0.092982 | 1.587202  | 4.316768  |
| H                                                                     | -0.118037 | 1.068801  | 3.009151  |
| N                                                                     | -2.415591 | 0.570900  | 0.412908  |
| C                                                                     | -2.835113 | 1.691651  | 1.298523  |
| C                                                                     | -2.539939 | -0.741650 | 1.098100  |
| C                                                                     | -3.242570 | 0.590954  | -0.813163 |
| N                                                                     | 0.198377  | 2.771590  | 0.425473  |
| C                                                                     | 1.480336  | 2.836659  | 1.194914  |
| C                                                                     | -0.887425 | 3.417327  | 1.237656  |
| C                                                                     | 0.334214  | 3.506087  | -0.857717 |
| C                                                                     | -2.329343 | 3.070680  | 0.850775  |
| N                                                                     | 2.245903  | 0.581582  | 0.292820  |
| C                                                                     | 2.602484  | 1.999204  | 0.588449  |
| C                                                                     | 2.561596  | -0.334278 | 1.427974  |
| C                                                                     | 3.026334  | 0.182908  | -0.902766 |
| N                                                                     | -0.273703 | -1.501218 | 0.168162  |
| C                                                                     | -1.726191 | -1.830794 | 0.394929  |
| C                                                                     | 0.569572  | -2.106485 | 1.254512  |
| C                                                                     | 0.139153  | -2.034032 | -1.169071 |
| C                                                                     | 2.074943  | -1.782698 | 1.247526  |
| H                                                                     | 1.821408  | 3.877799  | 1.250504  |
| H                                                                     | 1.268379  | 2.502754  | 2.203467  |
| H                                                                     | 3.465189  | 2.044210  | 1.263360  |
| H                                                                     | 2.923659  | 2.453467  | -0.347741 |
| H                                                                     | 2.479022  | -2.335609 | 2.101398  |
| H                                                                     | 2.557772  | -2.234805 | 0.380335  |
| H                                                                     | 0.137424  | -1.780331 | 2.196042  |
| H                                                                     | 0.466044  | -3.196729 | 1.184676  |
| H                                                                     | -0.727524 | 3.140545  | 2.276036  |
| H                                                                     | -0.750403 | 4.502437  | 1.167368  |
| H                                                                     | -2.499998 | 3.225031  | -0.216782 |
| H                                                                     | -2.957775 | 3.813835  | 1.349332  |
| H                                                                     | -2.465663 | 1.477977  | 2.298921  |
| H                                                                     | -3.930959 | 1.711889  | 1.348335  |
| H                                                                     | -2.973179 | -0.225324 | -1.475114 |
| H                                                                     | -4.303659 | 0.500367  | -0.552689 |
| H                                                                     | -3.085884 | 1.513676  | -1.364227 |
| H                                                                     | -2.188605 | -0.617004 | 2.116900  |
| H                                                                     | -3.587832 | -1.066374 | 1.126510  |
| H                                                                     | -2.169404 | -2.044302 | -0.575608 |
| H                                                                     | -1.797727 | -2.752962 | 0.978085  |
| H                                                                     | 2.858086  | -0.859383 | -1.150046 |
| H                                                                     | 2.717046  | 0.775757  | -1.759239 |
| H                                                                     | 4.099169  | 0.321754  | -0.722023 |
| H                                                                     | 1.089822  | 3.044624  | -1.486497 |
| H                                                                     | -0.606593 | 3.481026  | -1.401893 |
| H                                                                     | 0.609511  | 4.548297  | -0.665238 |
| H                                                                     | 3.652106  | -0.363199 | 1.561797  |
| H                                                                     | 2.120013  | 0.083913  | 2.327464  |
| S                                                                     | -0.150314 | 0.596283  | -2.020270 |
| C                                                                     | -0.410408 | -1.207894 | -2.316790 |



---

|   |           |           |           |
|---|-----------|-----------|-----------|
| H | 0.110492  | -1.475138 | -3.236997 |
| H | -1.469962 | -1.399537 | -2.490188 |
| H | 1.222957  | -2.020605 | -1.210764 |
| H | -0.175692 | -3.082388 | -1.252820 |
| H | 0.802801  | 2.192938  | 4.414734  |
| H | -1.018361 | 2.141487  | 4.441081  |
| H | -0.059364 | 0.658423  | 4.877663  |

<sup>36</sup>TS<sub>H</sub>-[Fe<sup>IV</sup>=O(TMC)(OH)]<sup>+</sup>

|    |           |           |           |
|----|-----------|-----------|-----------|
| Fe | -0.257478 | 0.807548  | 0.184613  |
| O  | -0.308877 | 1.227061  | 1.920124  |
| C  | -1.457392 | 0.638216  | 4.080957  |
| H  | -0.916145 | 0.861492  | 2.908844  |
| N  | -2.508324 | 0.721367  | 0.043015  |
| C  | -3.096727 | 1.981725  | 0.572831  |
| C  | -2.781585 | -0.418166 | 0.947686  |
| C  | -3.030595 | 0.450879  | -1.312804 |
| N  | 0.047145  | 2.967409  | -0.013776 |
| C  | 1.236780  | 3.211838  | 0.850186  |
| C  | -1.133533 | 3.696131  | 0.542157  |
| C  | 0.306886  | 3.427221  | -1.396777 |
| C  | -2.501403 | 3.271044  | -0.006424 |
| N  | 2.099367  | 0.843465  | 0.419624  |
| C  | 2.422338  | 2.298308  | 0.525690  |
| C  | 2.337716  | 0.121803  | 1.702194  |
| C  | 2.946697  | 0.267933  | -0.645132 |
| N  | -0.420777 | -1.341022 | 0.515280  |
| C  | -1.888336 | -1.633604 | 0.672063  |
| C  | 0.351456  | -1.668475 | 1.757772  |
| C  | 0.075011  | -2.179088 | -0.606597 |
| C  | 1.855831  | -1.339508 | 1.744420  |
| H  | 1.570538  | 4.251532  | 0.744200  |
| H  | 0.920619  | 3.062281  | 1.878056  |
| H  | 3.195598  | 2.462563  | 1.284922  |
| H  | 2.860220  | 2.604972  | -0.423138 |
| H  | 2.237690  | -1.742993 | 2.687224  |
| H  | 2.360694  | -1.927607 | 0.976221  |
| H  | -0.124808 | -1.154458 | 2.585621  |
| H  | 0.253683  | -2.746838 | 1.938933  |
| H  | -1.122743 | 3.547553  | 1.620176  |
| H  | -0.990829 | 4.767025  | 0.352305  |
| H  | -2.499697 | 3.245332  | -1.097990 |
| H  | -3.196190 | 4.073983  | 0.256674  |
| H  | -2.952938 | 1.986834  | 1.652662  |
| H  | -4.179346 | 1.973901  | 0.388851  |
| H  | -2.564259 | -0.435361 | -1.731789 |
| H  | -4.118790 | 0.314689  | -1.282682 |
| H  | -2.790604 | 1.275157  | -1.978549 |
| H  | -2.638973 | -0.072135 | 1.965290  |
| H  | -3.825306 | -0.749487 | 0.860666  |
| H  | -2.219816 | -2.113637 | -0.246558 |
| H  | -2.036107 | -2.363616 | 1.473660  |
| H  | 1.137220  | -2.025587 | -0.761312 |
| H  | -0.093240 | -3.239274 | -0.388032 |
| H  | -0.440973 | -1.903765 | -1.521131 |
| H  | 2.743817  | -0.790672 | -0.780189 |
| H  | 2.757467  | 0.774761  | -1.591424 |

---

|   |           |           |           |
|---|-----------|-----------|-----------|
| H | 4.012776  | 0.379687  | -0.410294 |
| H | 1.180279  | 2.930309  | -1.807291 |
| H | -0.532574 | 3.181592  | -2.039527 |
| H | 0.474304  | 4.510322  | -1.406777 |
| H | 3.417502  | 0.120049  | 1.909523  |
| H | 1.846401  | 0.686914  | 2.489336  |
| O | -0.154214 | 0.580888  | -1.612208 |
| H | 0.704671  | 0.352771  | -1.981557 |
| H | -0.643485 | 0.908068  | 4.748173  |
| H | -2.299594 | 1.322088  | 4.130059  |
| H | -1.740837 | -0.408479 | 4.143621  |

$3\pi$ TS<sub>H</sub><sup>-</sup>[Fe<sup>IV</sup>=O(TMC)(OH)]<sup>+</sup>

|    |           |           |           |
|----|-----------|-----------|-----------|
| Fe | -0.223119 | 0.780947  | 0.185225  |
| O  | -0.330163 | 1.193670  | 1.949430  |
| C  | -1.535545 | 0.604213  | 4.106772  |
| H  | -0.932379 | 0.840533  | 2.861747  |
| N  | -2.332140 | 0.713875  | 0.028899  |
| C  | -3.013885 | 1.923191  | 0.583341  |
| C  | -2.685322 | -0.449708 | 0.890797  |
| C  | -2.834589 | 0.482828  | -1.353555 |
| N  | 0.010189  | 2.900020  | -0.007134 |
| C  | 1.206347  | 3.179302  | 0.843540  |
| C  | -1.142055 | 3.658241  | 0.571007  |
| C  | 0.247846  | 3.385553  | -1.389585 |
| C  | -2.512457 | 3.255923  | 0.041197  |
| N  | 1.926601  | 0.802125  | 0.428677  |
| C  | 2.348229  | 2.244265  | 0.505651  |
| C  | 2.238949  | 0.110385  | 1.723520  |
| C  | 2.742205  | 0.188513  | -0.653963 |
| N  | -0.374019 | -1.338902 | 0.458173  |
| C  | -1.841242 | -1.654944 | 0.542318  |
| C  | 0.313811  | -1.693939 | 1.741253  |
| C  | 0.156468  | -2.201187 | -0.637787 |
| C  | 1.807826  | -1.356999 | 1.807134  |
| H  | 1.531988  | 4.217131  | 0.707371  |
| H  | 0.898666  | 3.039036  | 1.874070  |
| H  | 3.146115  | 2.359966  | 1.244420  |
| H  | 2.779257  | 2.513379  | -0.457100 |
| H  | 2.147886  | -1.709911 | 2.785088  |
| H  | 2.365381  | -1.960026 | 1.088657  |
| H  | -0.210463 | -1.189242 | 2.545540  |
| H  | 0.204998  | -2.774764 | 1.893692  |
| H  | -1.119233 | 3.495399  | 1.645886  |
| H  | -0.970845 | 4.724163  | 0.383495  |
| H  | -2.553880 | 3.289819  | -1.049440 |
| H  | -3.218943 | 4.019089  | 0.379369  |
| H  | -2.873942 | 1.911812  | 1.662141  |
| H  | -4.086894 | 1.824004  | 0.383787  |
| H  | -2.331425 | -0.359754 | -1.810759 |
| H  | -3.915525 | 0.311093  | -1.320991 |
| H  | -2.623503 | 1.346229  | -1.975472 |
| H  | -2.529107 | -0.155000 | 1.921946  |
| H  | -3.745283 | -0.702229 | 0.769422  |
| H  | -2.145677 | -2.045706 | -0.425935 |
| H  | -2.010244 | -2.453159 | 1.271192  |
| H  | 1.238850  | -2.195834 | -0.650959 |

---

|   |           |           |           |
|---|-----------|-----------|-----------|
| H | -0.171006 | -3.233269 | -0.479005 |
| H | -0.195617 | -1.823454 | -1.591704 |
| H | 2.507751  | -0.859315 | -0.780107 |
| H | 2.546964  | 0.685330  | -1.599337 |
| H | 3.806525  | 0.286318  | -0.415901 |
| H | 1.152911  | 2.948384  | -1.802906 |
| H | -0.583303 | 3.115761  | -2.034171 |
| H | 0.366688  | 4.473793  | -1.389882 |
| H | 3.324942  | 0.152889  | 1.871553  |
| H | 1.756709  | 0.681181  | 2.510785  |
| O | -0.092620 | 0.467961  | -1.640491 |
| H | 0.506827  | 1.008035  | -2.161180 |
| H | -0.747895 | 0.946281  | 4.771244  |
| H | -2.417246 | 1.238186  | 4.117598  |
| H | -1.756927 | -0.455305 | 4.200938  |

$5\sigma$ -TS<sub>H</sub>-[Fe<sup>IV</sup>=O(TMC)(OH)]<sup>+</sup>

|    |           |           |           |
|----|-----------|-----------|-----------|
| Fe | -0.120948 | 0.672062  | 0.258874  |
| O  | -0.208150 | 0.633617  | 2.062063  |
| C  | -0.291880 | 0.586323  | 4.587288  |
| H  | -0.248728 | 0.605803  | 3.211997  |
| N  | -2.357113 | 0.518432  | 0.340890  |
| C  | -2.892392 | 1.660523  | 1.140893  |
| C  | -2.536456 | -0.761411 | 1.078817  |
| C  | -3.028629 | 0.471452  | -0.974600 |
| N  | 0.157648  | 2.874437  | 0.478145  |
| C  | 1.403513  | 2.920013  | 1.293140  |
| C  | -0.988445 | 3.444077  | 1.245729  |
| C  | 0.330487  | 3.614642  | -0.793060 |
| C  | -2.383020 | 3.051830  | 0.735264  |
| N  | 2.148490  | 0.648320  | 0.382007  |
| C  | 2.523097  | 2.067583  | 0.696298  |
| C  | 2.516237  | -0.273301 | 1.497941  |
| C  | 2.856070  | 0.267535  | -0.864819 |
| N  | -0.269903 | -1.614120 | 0.246770  |
| C  | -1.723642 | -1.909619 | 0.477054  |
| C  | 0.565048  | -2.089158 | 1.394778  |
| C  | 0.142043  | -2.304778 | -0.997551 |
| C  | 2.061287  | -1.734937 | 1.342088  |
| H  | 1.767033  | 3.952463  | 1.374384  |
| H  | 1.151143  | 2.567446  | 2.287998  |
| H  | 3.376955  | 2.082861  | 1.381341  |
| H  | 2.864214  | 2.522363  | -0.232053 |
| H  | 2.509665  | -2.266144 | 2.187363  |
| H  | 2.524439  | -2.183104 | 0.462092  |
| H  | 0.126228  | -1.679459 | 2.299645  |
| H  | 0.485634  | -3.183577 | 1.441129  |
| H  | -0.885232 | 3.114630  | 2.277855  |
| H  | -0.900332 | 4.537201  | 1.234675  |
| H  | -2.462828 | 3.201910  | -0.343775 |
| H  | -3.081249 | 3.769730  | 1.173958  |
| H  | -2.628709 | 1.478346  | 2.180446  |
| H  | -3.986843 | 1.647590  | 1.066803  |
| H  | -2.650630 | -0.356989 | -1.567880 |
| H  | -4.110789 | 0.349749  | -0.849022 |
| H  | -2.829558 | 1.385002  | -1.528024 |
| H  | -2.230905 | -0.584635 | 2.104739  |

|   |           |           |           |
|---|-----------|-----------|-----------|
| H | -3.593264 | -1.057850 | 1.079653  |
| H | -2.152699 | -2.190628 | -0.483680 |
| H | -1.827680 | -2.785138 | 1.126106  |
| H | 1.179627  | -2.095630 | -1.233249 |
| H | 0.017192  | -3.389554 | -0.899833 |
| H | -0.465252 | -1.959685 | -1.831321 |
| H | 2.687506  | -0.777828 | -1.100231 |
| H | 2.470098  | 0.859055  | -1.690556 |
| H | 3.935401  | 0.424498  | -0.757116 |
| H | 1.095378  | 3.148851  | -1.404977 |
| H | -0.589656 | 3.582545  | -1.369113 |
| H | 0.596553  | 4.657813  | -0.587488 |
| H | 3.610128  | -0.275485 | 1.597094  |
| H | 2.095701  | 0.142269  | 2.409544  |
| O | -0.062152 | 0.866401  | -1.611986 |
| H | -0.346143 | 0.277439  | -2.313829 |
| H | -0.839142 | 1.487542  | 4.845999  |
| H | -0.813918 | -0.334890 | 4.827213  |
| H | 0.750627  | 0.597626  | 4.889376  |

$5\pi\text{TS}_{\text{H}}\text{-}[\text{Fe}^{\text{IV}}=\text{O}(\text{TMC})(\text{OH})]^+$

|    |           |           |           |
|----|-----------|-----------|-----------|
| Fe | -0.252801 | 0.791490  | 0.163194  |
| O  | -0.443432 | 1.256418  | 1.890874  |
| C  | -1.326811 | 0.470957  | 4.140234  |
| H  | -0.873783 | 0.779348  | 2.832843  |
| N  | -2.464384 | 0.697399  | -0.015479 |
| C  | -3.082840 | 1.947161  | 0.514719  |
| C  | -2.749596 | -0.448349 | 0.886381  |
| C  | -2.971237 | 0.423600  | -1.379711 |
| N  | 0.037992  | 2.985827  | -0.044884 |
| C  | 1.204887  | 3.214077  | 0.856799  |
| C  | -1.160992 | 3.701117  | 0.496716  |
| C  | 0.332274  | 3.485694  | -1.405404 |
| C  | -2.515547 | 3.249860  | -0.061773 |
| N  | 2.007612  | 0.820967  | 0.473202  |
| C  | 2.371658  | 2.270526  | 0.566240  |
| C  | 2.240280  | 0.114426  | 1.769225  |
| C  | 2.839402  | 0.217819  | -0.594881 |
| N  | -0.404816 | -1.396229 | 0.479250  |
| C  | -1.878079 | -1.668017 | 0.582993  |
| C  | 0.305895  | -1.720529 | 1.754902  |
| C  | 0.116812  | -2.248447 | -0.621505 |
| C  | 1.799839  | -1.358440 | 1.814444  |
| H  | 1.563137  | 4.245792  | 0.755008  |
| H  | 0.852259  | 3.068231  | 1.871988  |
| H  | 3.132924  | 2.417037  | 1.339424  |
| H  | 2.839252  | 2.548828  | -0.377241 |
| H  | 2.146122  | -1.734421 | 2.781752  |
| H  | 2.357751  | -1.942126 | 1.080788  |
| H  | -0.221111 | -1.220948 | 2.561124  |
| H  | 0.221145  | -2.801491 | 1.927873  |
| H  | -1.159239 | 3.553793  | 1.573812  |
| H  | -1.031566 | 4.772404  | 0.301335  |
| H  | -2.510779 | 3.229012  | -1.154130 |
| H  | -3.228802 | 4.036234  | 0.201089  |
| H  | -2.940573 | 1.951688  | 1.593804  |
| H  | -4.161939 | 1.908677  | 0.320464  |

---

|   |           |           |           |
|---|-----------|-----------|-----------|
| H | -2.448572 | -0.418480 | -1.820511 |
| H | -4.048465 | 0.222941  | -1.347006 |
| H | -2.789255 | 1.279025  | -2.024219 |
| H | -2.590851 | -0.110707 | 1.904684  |
| H | -3.799773 | -0.753824 | 0.796455  |
| H | -2.190971 | -2.100670 | -0.365008 |
| H | -2.062280 | -2.428832 | 1.348261  |
| H | 1.196903  | -2.181229 | -0.681836 |
| H | -0.153586 | -3.295181 | -0.444765 |
| H | -0.285833 | -1.903437 | -1.568484 |
| H | 2.619986  | -0.836667 | -0.711639 |
| H | 2.625272  | 0.698017  | -1.545580 |
| H | 3.904806  | 0.330594  | -0.362256 |
| H | 1.220168  | 3.004452  | -1.811163 |
| H | -0.503961 | 3.285998  | -2.072552 |
| H | 0.511266  | 4.566459  | -1.387594 |
| H | 3.315676  | 0.145267  | 1.990230  |
| H | 1.719360  | 0.678248  | 2.538521  |
| O | -0.062626 | 0.443826  | -1.638842 |
| H | 0.267115  | 1.158867  | -2.190796 |
| H | -0.398919 | 0.455987  | 4.704041  |
| H | -1.959580 | 1.325282  | 4.358766  |
| H | -1.852359 | -0.479150 | 4.125333  |

## IN

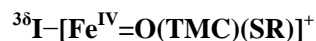

|    |           |           |           |
|----|-----------|-----------|-----------|
| Fe | -0.180030 | 0.578801  | 0.228349  |
| O  | -0.278023 | 0.340279  | 2.092612  |
| C  | -0.356762 | 2.030754  | 5.283423  |
| H  | -0.307478 | 1.106628  | 2.672540  |
| N  | -2.484771 | 0.559642  | 0.337314  |
| C  | -2.912466 | 1.648490  | 1.257043  |
| C  | -2.644355 | -0.777931 | 0.963767  |
| C  | -3.275135 | 0.644108  | -0.909379 |
| N  | 0.179067  | 2.687212  | 0.537922  |
| C  | 1.440955  | 2.704495  | 1.344247  |
| C  | -0.918274 | 3.324749  | 1.342935  |
| C  | 0.366174  | 3.475150  | -0.708400 |
| C  | -2.354797 | 3.032719  | 0.896082  |
| N  | 2.195233  | 0.475305  | 0.371263  |
| C  | 2.565081  | 1.871953  | 0.734897  |
| C  | 2.440788  | -0.483423 | 1.488181  |
| C  | 3.020268  | 0.103133  | -0.802144 |
| N  | -0.365431 | -1.535394 | 0.072635  |
| C  | -1.831554 | -1.846456 | 0.230753  |
| C  | 0.415636  | -2.187789 | 1.178794  |
| C  | 0.092578  | -2.033774 | -1.263957 |
| C  | 1.928440  | -1.911741 | 1.238712  |
| H  | 1.795106  | 3.737671  | 1.445760  |
| H  | 1.206831  | 2.345959  | 2.342237  |
| H  | 3.410126  | 1.875724  | 1.433611  |
| H  | 2.918288  | 2.359672  | -0.172547 |
| H  | 2.281860  | -2.502723 | 2.089604  |
| H  | 2.433399  | -2.349869 | 0.376767  |
| H  | -0.042476 | -1.865459 | 2.109454  |
| H  | 0.279903  | -3.272019 | 1.081617  |

|   |           |           |           |
|---|-----------|-----------|-----------|
| H | -0.800658 | 3.016477  | 2.382105  |
| H | -0.752787 | 4.407857  | 1.324100  |
| H | -2.483434 | 3.241004  | -0.168094 |
| H | -2.980636 | 3.768826  | 1.408300  |
| H | -2.595629 | 1.379523  | 2.262636  |
| H | -4.008624 | 1.697962  | 1.263293  |
| H | -2.986263 | -0.137034 | -1.604993 |
| H | -4.344156 | 0.544135  | -0.686911 |
| H | -3.100335 | 1.593687  | -1.407074 |
| H | -2.310021 | -0.701956 | 1.993398  |
| H | -3.697088 | -1.087776 | 0.957489  |
| H | -2.244090 | -1.998782 | -0.764436 |
| H | -1.939870 | -2.796607 | 0.761121  |
| H | 2.849402  | -0.929062 | -1.087330 |
| H | 2.754230  | 0.726603  | -1.651803 |
| H | 4.086737  | 0.220836  | -0.574715 |
| H | 1.133234  | 3.026681  | -1.332307 |
| H | -0.557512 | 3.487874  | -1.281197 |
| H | 0.651810  | 4.503573  | -0.463800 |
| H | 3.523128  | -0.541491 | 1.670054  |
| H | 1.963726  | -0.085990 | 2.379272  |
| S | -0.129832 | 0.631488  | -2.035571 |
| C | -0.396955 | -1.160018 | -2.404255 |
| H | 0.157998  | -1.403643 | -3.311004 |
| H | -1.451075 | -1.329275 | -2.627175 |
| H | 1.177248  | -2.037415 | -1.261453 |
| H | -0.235412 | -3.073043 | -1.394313 |
| H | -1.273113 | 2.586005  | 5.419734  |
| H | -0.388870 | 0.953028  | 5.220924  |
| H | 0.591423  | 2.531011  | 5.415223  |

$3\pi\text{IN}-[\text{Fe}^{\text{IV}}=\text{O}(\text{TMC})(\text{SR})]^+$

|    |           |           |           |
|----|-----------|-----------|-----------|
| Fe | -0.127664 | 0.572851  | 0.192208  |
| O  | -0.208929 | 0.383771  | 2.062591  |
| C  | 0.298332  | 2.209209  | 5.182019  |
| H  | -0.047990 | 1.144305  | 2.628073  |
| N  | -2.282074 | 0.538126  | 0.332427  |
| C  | -2.797410 | 1.592531  | 1.258656  |
| C  | -2.508730 | -0.792616 | 0.971749  |
| C  | -3.068795 | 0.621240  | -0.927975 |
| N  | 0.115954  | 2.682482  | 0.444135  |
| C  | 1.407908  | 2.791543  | 1.185670  |
| C  | -0.937876 | 3.344180  | 1.279077  |
| C  | 0.218091  | 3.434198  | -0.836864 |
| C  | -2.376607 | 3.014804  | 0.903133  |
| N  | 2.073685  | 0.535903  | 0.269720  |
| C  | 2.491318  | 1.948483  | 0.551576  |
| C  | 2.441050  | -0.369049 | 1.409838  |
| C  | 2.882208  | 0.129457  | -0.918024 |
| N  | -0.283529 | -1.513775 | 0.071148  |
| C  | -1.735472 | -1.868652 | 0.240668  |
| C  | 0.504565  | -2.149411 | 1.180580  |
| C  | 0.160733  | -2.051664 | -1.255341 |
| C  | 2.002715  | -1.826891 | 1.234257  |
| H  | 1.738706  | 3.836992  | 1.211727  |
| H  | 1.239968  | 2.489251  | 2.215832  |
| H  | 3.381015  | 1.954743  | 1.189105  |

---

|   |           |           |           |
|---|-----------|-----------|-----------|
| H | 2.786629  | 2.393117  | -0.396984 |
| H | 2.381432  | -2.359779 | 2.111803  |
| H | 2.525050  | -2.281077 | 0.391302  |
| H | 0.038733  | -1.834920 | 2.109684  |
| H | 0.397306  | -3.236650 | 1.085230  |
| H | -0.776146 | 3.057350  | 2.317768  |
| H | -0.779486 | 4.427078  | 1.224217  |
| H | -2.582066 | 3.248104  | -0.143013 |
| H | -3.012671 | 3.691699  | 1.480349  |
| H | -2.440177 | 1.348766  | 2.256004  |
| H | -3.891019 | 1.525487  | 1.268505  |
| H | -2.795332 | -0.174345 | -1.609781 |
| H | -4.135683 | 0.542975  | -0.694828 |
| H | -2.875242 | 1.559464  | -1.436285 |
| H | -2.167597 | -0.716696 | 1.999041  |
| H | -3.576901 | -1.037301 | 0.966710  |
| H | -2.160779 | -2.030199 | -0.747530 |
| H | -1.823349 | -2.817655 | 0.776467  |
| H | 2.733653  | -0.914800 | -1.159017 |
| H | 2.587492  | 0.715570  | -1.781735 |
| H | 3.944123  | 0.282596  | -0.699088 |
| H | 0.977302  | 2.999525  | -1.479168 |
| H | -0.726565 | 3.386482  | -1.370946 |
| H | 0.466961  | 4.481631  | -0.638047 |
| H | 3.533010  | -0.350972 | 1.513528  |
| H | 1.999068  | 0.035133  | 2.313913  |
| S | -0.098915 | 0.588601  | -2.081473 |
| C | -0.340972 | -1.209467 | -2.416180 |
| H | 0.217163  | -1.467641 | -3.316807 |
| H | -1.391330 | -1.407713 | -2.637249 |
| H | 1.244206  | -2.071097 | -1.265997 |
| H | -0.177258 | -3.091362 | -1.348482 |
| H | 1.374847  | 2.262556  | 5.252620  |
| H | -0.283797 | 3.114374  | 5.273667  |
| H | -0.192495 | 1.248355  | 5.227386  |

$^{55}\text{In}-[\text{Fe}^{\text{IV}}=\text{O}(\text{TMC})(\text{SR})]^+$

|    |           |           |           |
|----|-----------|-----------|-----------|
| Fe | -0.214688 | 0.683721  | 0.209219  |
| O  | -0.469966 | 0.662810  | 2.094272  |
| C  | 0.600056  | 0.525101  | 5.323682  |
| H  | 0.009012  | 0.551295  | 2.921210  |
| N  | -2.496348 | 0.601546  | 0.231151  |
| C  | -2.994462 | 1.739120  | 1.059621  |
| C  | -2.683033 | -0.701564 | 0.929774  |
| C  | -3.218667 | 0.598798  | -1.060129 |
| N  | 0.094842  | 2.882116  | 0.422530  |
| C  | 1.296786  | 2.920072  | 1.309029  |
| C  | -1.066347 | 3.490743  | 1.149265  |
| C  | 0.341038  | 3.617765  | -0.839925 |
| C  | -2.461938 | 3.116813  | 0.633104  |
| N  | 2.109713  | 0.640743  | 0.478371  |
| C  | 2.455503  | 2.061564  | 0.807107  |
| C  | 2.354224  | -0.283157 | 1.625082  |
| C  | 2.972720  | 0.238263  | -0.661275 |
| N  | -0.383980 | -1.537102 | 0.161673  |
| C  | -1.853526 | -1.825263 | 0.298587  |
| C  | 0.375108  | -2.079829 | 1.331574  |

|   |           |           |           |
|---|-----------|-----------|-----------|
| C | 0.119479  | -2.097901 | -1.122190 |
| C | 1.875073  | -1.734536 | 1.427838  |
| H | 1.656744  | 3.952380  | 1.406856  |
| H | 0.975465  | 2.584252  | 2.289672  |
| H | 3.257032  | 2.092023  | 1.553510  |
| H | 2.864793  | 2.507113  | -0.097999 |
| H | 2.227683  | -2.276370 | 2.311073  |
| H | 2.418879  | -2.189737 | 0.599388  |
| H | -0.138218 | -1.726962 | 2.222591  |
| H | 0.297628  | -3.174925 | 1.313141  |
| H | -0.990798 | 3.181471  | 2.189500  |
| H | -0.951612 | 4.580557  | 1.113300  |
| H | -2.532499 | 3.252104  | -0.448934 |
| H | -3.145756 | 3.857866  | 1.055808  |
| H | -2.702315 | 1.547350  | 2.088892  |
| H | -4.090166 | 1.749917  | 1.011105  |
| H | -2.884990 | -0.219060 | -1.689554 |
| H | -4.296605 | 0.499061  | -0.887323 |
| H | -3.027186 | 1.519070  | -1.604453 |
| H | -2.390399 | -0.556692 | 1.964603  |
| H | -3.737910 | -1.002865 | 0.902871  |
| H | -2.236636 | -2.045799 | -0.695900 |
| H | -1.993653 | -2.735283 | 0.890507  |
| H | 2.797194  | -0.796338 | -0.934586 |
| H | 2.742418  | 0.846827  | -1.530617 |
| H | 4.030067  | 0.352391  | -0.394750 |
| H | 1.142645  | 3.150279  | -1.405992 |
| H | -0.551919 | 3.596932  | -1.460899 |
| H | 0.606198  | 4.660456  | -0.632739 |
| H | 3.435981  | -0.322381 | 1.813018  |
| H | 1.897085  | 0.146590  | 2.512077  |
| S | -0.042119 | 0.528068  | -2.140464 |
| C | -0.313248 | -1.290161 | -2.340680 |
| H | 0.261592  | -1.623143 | -3.205133 |
| H | -1.362885 | -1.459675 | -2.585079 |
| H | 1.204442  | -2.109796 | -1.078471 |
| H | -0.208672 | -3.140940 | -1.224573 |
| H | 1.202387  | 1.420270  | 5.378649  |
| H | -0.474090 | 0.601861  | 5.406361  |
| H | 1.073902  | -0.440502 | 5.422421  |

$5\pi$ IN-[Fe<sup>IV</sup>=O(TMC)(SR)]<sup>+</sup>

|    |           |           |           |
|----|-----------|-----------|-----------|
| Fe | -0.118290 | 0.585676  | 0.178757  |
| O  | -0.139173 | 0.385976  | 2.050139  |
| C  | -0.170779 | 2.229711  | 5.161874  |
| H  | -0.156618 | 1.163440  | 2.615933  |
| N  | -2.416659 | 0.527452  | 0.376431  |
| C  | -2.831522 | 1.625742  | 1.290433  |
| C  | -2.526435 | -0.799283 | 1.035800  |
| C  | -3.254585 | 0.571160  | -0.841125 |
| N  | 0.206469  | 2.707733  | 0.428712  |
| C  | 1.498164  | 2.767378  | 1.183895  |
| C  | -0.870671 | 3.341961  | 1.263019  |
| C  | 0.328276  | 3.471474  | -0.840187 |
| C  | -2.317872 | 3.013293  | 0.880701  |
| N  | 2.259940  | 0.531070  | 0.232531  |
| C  | 2.614331  | 1.942924  | 0.549458  |



---

|   |           |           |           |
|---|-----------|-----------|-----------|
| C | 2.567510  | -0.397521 | 1.359218  |
| C | 3.046666  | 0.148206  | -0.963488 |
| N | -0.269683 | -1.534488 | 0.074284  |
| C | -1.722581 | -1.868217 | 0.293992  |
| C | 0.564970  | -2.147017 | 1.164123  |
| C | 0.147330  | -2.054285 | -1.267579 |
| C | 2.073293  | -1.840259 | 1.160561  |
| H | 1.835431  | 3.809118  | 1.248447  |
| H | 1.310162  | 2.427330  | 2.197896  |
| H | 3.486143  | 1.980326  | 1.213459  |
| H | 2.920963  | 2.416117  | -0.382413 |
| H | 2.470302  | -2.405361 | 2.009731  |
| H | 2.553523  | -2.287603 | 0.289370  |
| H | 0.135419  | -1.813004 | 2.104187  |
| H | 0.447884  | -3.235668 | 1.095606  |
| H | -0.705889 | 3.058503  | 2.302628  |
| H | -0.727522 | 4.427441  | 1.214284  |
| H | -2.493911 | 3.198357  | -0.180969 |
| H | -2.937264 | 3.746928  | 1.404182  |
| H | -2.469866 | 1.383831  | 2.287871  |
| H | -3.927410 | 1.652649  | 1.339165  |
| H | -2.976046 | -0.218240 | -1.531504 |
| H | -4.312434 | 0.455441  | -0.576822 |
| H | -3.117380 | 1.513498  | -1.363933 |
| H | -2.153769 | -0.694845 | 2.049652  |
| H | -3.572707 | -1.128045 | 1.077464  |
| H | -2.169328 | -2.048118 | -0.681674 |
| H | -1.793433 | -2.808945 | 0.846936  |
| H | 2.883077  | -0.892376 | -1.221426 |
| H | 2.738154  | 0.749033  | -1.815051 |
| H | 4.118711  | 0.288426  | -0.778705 |
| H | 1.080825  | 3.026166  | -1.483902 |
| H | -0.616622 | 3.451739  | -1.377088 |
| H | 0.599960  | 4.510957  | -0.628857 |
| H | 3.657165  | -0.431832 | 1.498909  |
| H | 2.118538  | 0.010472  | 2.259907  |
| S | -0.154083 | 0.589372  | -2.086124 |
| C | -0.399678 | -1.214482 | -2.407395 |
| H | 0.126902  | -1.467243 | -3.328397 |
| H | -1.457663 | -1.407969 | -2.588585 |
| H | 1.231246  | -2.039609 | -1.305718 |
| H | -0.166900 | -3.101619 | -1.363197 |
| H | 0.744519  | 2.795927  | 5.253542  |
| H | -1.120047 | 2.739387  | 5.238263  |
| H | -0.138686 | 1.151011  | 5.204349  |

<sup>36</sup>I-[Fe<sup>IV</sup>=O(TMC)(OH)]<sup>+</sup>

|    |           |           |           |
|----|-----------|-----------|-----------|
| Fe | -0.215654 | 0.851023  | 0.088907  |
| O  | -0.351434 | 1.265466  | 1.861274  |
| C  | -1.824004 | 0.224510  | 4.896326  |
| H  | -0.851510 | 0.722413  | 2.477561  |
| N  | -2.483839 | 0.767408  | 0.012245  |
| C  | -3.056733 | 2.039440  | 0.532373  |
| C  | -2.755700 | -0.355612 | 0.937806  |
| C  | -3.030032 | 0.479199  | -1.330962 |
| N  | 0.088164  | 2.995070  | -0.101195 |
| C  | 1.282142  | 3.235964  | 0.758910  |

|                                                                                                |           |           |           |
|------------------------------------------------------------------------------------------------|-----------|-----------|-----------|
| C                                                                                              | -1.084437 | 3.735714  | 0.458855  |
| C                                                                                              | 0.344326  | 3.447346  | -1.487990 |
| C                                                                                              | -2.459029 | 3.314295  | -0.074060 |
| N                                                                                              | 2.119364  | 0.860984  | 0.356652  |
| C                                                                                              | 2.456983  | 2.314141  | 0.427314  |
| C                                                                                              | 2.336061  | 0.180687  | 1.666176  |
| C                                                                                              | 2.974181  | 0.247764  | -0.680963 |
| N                                                                                              | -0.406688 | -1.302144 | 0.504226  |
| C                                                                                              | -1.875946 | -1.580220 | 0.664810  |
| C                                                                                              | 0.354835  | -1.613309 | 1.756071  |
| C                                                                                              | 0.085292  | -2.173583 | -0.594223 |
| C                                                                                              | 1.857499  | -1.279436 | 1.749520  |
| H                                                                                              | 1.620749  | 4.273152  | 0.647043  |
| H                                                                                              | 0.968229  | 3.089013  | 1.787268  |
| H                                                                                              | 3.247056  | 2.486097  | 1.167539  |
| H                                                                                              | 2.876533  | 2.598544  | -0.536624 |
| H                                                                                              | 2.232484  | -1.653848 | 2.706799  |
| H                                                                                              | 2.369176  | -1.889438 | 1.003074  |
| H                                                                                              | -0.130554 | -1.103809 | 2.585383  |
| H                                                                                              | 0.258806  | -2.689837 | 1.949080  |
| H                                                                                              | -1.065428 | 3.594156  | 1.537339  |
| H                                                                                              | -0.934629 | 4.803388  | 0.257533  |
| H                                                                                              | -2.466325 | 3.270584  | -1.165169 |
| H                                                                                              | -3.145557 | 4.126744  | 0.181278  |
| H                                                                                              | -2.895922 | 2.060157  | 1.609808  |
| H                                                                                              | -4.141727 | 2.035665  | 0.362961  |
| H                                                                                              | -2.572795 | -0.413679 | -1.745946 |
| H                                                                                              | -4.118047 | 0.347581  | -1.282614 |
| H                                                                                              | -2.798245 | 1.294168  | -2.011085 |
| H                                                                                              | -2.613613 | -0.000084 | 1.956358  |
| H                                                                                              | -3.802643 | -0.680183 | 0.866166  |
| H                                                                                              | -2.214884 | -2.056445 | -0.252917 |
| H                                                                                              | -2.029801 | -2.308149 | 1.467291  |
| H                                                                                              | 1.149602  | -2.033406 | -0.748848 |
| H                                                                                              | -0.092325 | -3.226915 | -0.351261 |
| H                                                                                              | -0.426602 | -1.917242 | -1.516712 |
| H                                                                                              | 2.765415  | -0.813215 | -0.785942 |
| H                                                                                              | 2.796125  | 0.726993  | -1.643555 |
| H                                                                                              | 4.038411  | 0.359628  | -0.438241 |
| H                                                                                              | 1.202279  | 2.930812  | -1.906820 |
| H                                                                                              | -0.507145 | 3.218046  | -2.121236 |
| H                                                                                              | 0.532720  | 4.526777  | -1.501924 |
| H                                                                                              | 3.412332  | 0.188448  | 1.890208  |
| H                                                                                              | 1.830140  | 0.771313  | 2.424915  |
| O                                                                                              | -0.144081 | 0.578271  | -1.694440 |
| H                                                                                              | 0.696723  | 0.283102  | -2.059007 |
| H                                                                                              | -0.940829 | 0.824153  | 5.061072  |
| H                                                                                              | -2.777556 | 0.711115  | 4.752557  |
| H                                                                                              | -1.795705 | -0.835832 | 5.100706  |
| <b><math>{}^3\pi\text{IN}=[\text{Fe}^{\text{IV}}=\text{O}(\text{TMC})(\text{OH})]^+</math></b> |           |           |           |
| Fe                                                                                             | -0.174935 | 0.811734  | 0.112102  |
| O                                                                                              | -0.309138 | 1.232969  | 1.936767  |
| C                                                                                              | -2.074819 | 0.268160  | 4.915544  |
| H                                                                                              | -0.913536 | 0.752350  | 2.509172  |
| N                                                                                              | -2.300127 | 0.749695  | 0.013636  |
| C                                                                                              | -2.966751 | 1.969935  | 0.563175  |

---

|   |           |           |           |
|---|-----------|-----------|-----------|
| C | -2.651010 | -0.403038 | 0.890046  |
| C | -2.827838 | 0.504731  | -1.357484 |
| N | 0.059543  | 2.916310  | -0.083884 |
| C | 1.262140  | 3.193637  | 0.757982  |
| C | -1.081476 | 3.686990  | 0.502233  |
| C | 0.286577  | 3.392727  | -1.471097 |
| C | -2.462170 | 3.290493  | -0.004510 |
| N | 1.965034  | 0.821136  | 0.347940  |
| C | 2.397697  | 2.259905  | 0.402374  |
| C | 2.276899  | 0.153314  | 1.656479  |
| C | 2.771825  | 0.183186  | -0.726797 |
| N | -0.345575 | -1.308584 | 0.443822  |
| C | -1.812682 | -1.614987 | 0.548584  |
| C | 0.351532  | -1.649896 | 1.724955  |
| C | 0.168430  | -2.194937 | -0.641198 |
| C | 1.845708  | -1.311761 | 1.772366  |
| H | 1.584655  | 4.232844  | 0.625901  |
| H | 0.962758  | 3.045186  | 1.790044  |
| H | 3.211817  | 2.378440  | 1.122947  |
| H | 2.808099  | 2.519518  | -0.571972 |
| H | 2.195368  | -1.646196 | 2.753397  |
| H | 2.394965  | -1.929360 | 1.059850  |
| H | -0.164276 | -1.142384 | 2.535648  |
| H | 0.243448  | -2.728727 | 1.891615  |
| H | -1.045323 | 3.532069  | 1.577775  |
| H | -0.904959 | 4.749799  | 0.302416  |
| H | -2.518332 | 3.309139  | -1.094891 |
| H | -3.157145 | 4.064745  | 0.332394  |
| H | -2.810320 | 1.974635  | 1.640454  |
| H | -4.043605 | 1.876006  | 0.381976  |
| H | -2.336784 | -0.346197 | -1.812427 |
| H | -3.909436 | 0.341420  | -1.306874 |
| H | -2.620299 | 1.359117  | -1.992886 |
| H | -2.507270 | -0.103502 | 1.925279  |
| H | -3.711946 | -0.655648 | 0.777209  |
| H | -2.131021 | -2.012795 | -0.412209 |
| H | -1.978848 | -2.405219 | 1.286895  |
| H | 1.250769  | -2.196580 | -0.664539 |
| H | -0.163803 | -3.222264 | -0.462196 |
| H | -0.189843 | -1.830272 | -1.597921 |
| H | 2.527800  | -0.864642 | -0.835251 |
| H | 2.576449  | 0.666550  | -1.679418 |
| H | 3.838028  | 0.275735  | -0.494953 |
| H | 1.176324  | 2.936330  | -1.896799 |
| H | -0.559153 | 3.135229  | -2.101879 |
| H | 0.425013  | 4.478686  | -1.478573 |
| H | 3.363224  | 0.197243  | 1.801509  |
| H | 1.794264  | 0.739553  | 2.432100  |
| O | -0.089528 | 0.455238  | -1.701202 |
| H | 0.511537  | 0.985278  | -2.231300 |
| H | -1.201335 | 0.888745  | 5.050940  |
| H | -3.038274 | 0.730000  | 4.757040  |
| H | -2.023909 | -0.785612 | 5.147210  |

<sup>56</sup>IN-[Fe<sup>IV</sup>=O(TMC)(OH)]<sup>+</sup>

|    |           |          |          |
|----|-----------|----------|----------|
| Fe | -0.203227 | 0.651643 | 0.202622 |
| O  | -0.480674 | 0.562536 | 2.085676 |

---

|   |           |           |           |
|---|-----------|-----------|-----------|
| C | 0.712651  | 0.847901  | 5.296746  |
| H | 0.051175  | 0.640455  | 2.882946  |
| N | -2.440701 | 0.528199  | 0.172876  |
| C | -3.017030 | 1.660540  | 0.958061  |
| C | -2.673909 | -0.763101 | 0.879332  |
| C | -3.030011 | 0.506013  | -1.183355 |
| N | 0.078221  | 2.858173  | 0.485628  |
| C | 1.273362  | 2.879385  | 1.374013  |
| C | -1.107200 | 3.423518  | 1.198348  |
| C | 0.333020  | 3.621561  | -0.757860 |
| C | -2.473681 | 3.053159  | 0.602917  |
| N | 2.067813  | 0.607589  | 0.484327  |
| C | 2.426883  | 2.019058  | 0.852407  |
| C | 2.369946  | -0.351610 | 1.587753  |
| C | 2.847321  | 0.248923  | -0.725446 |
| N | -0.375633 | -1.640205 | 0.156345  |
| C | -1.847122 | -1.912555 | 0.299464  |
| C | 0.385537  | -2.131985 | 1.346467  |
| C | 0.092946  | -2.328830 | -1.067738 |
| C | 1.889251  | -1.800053 | 1.378937  |
| H | 1.645217  | 3.906452  | 1.485686  |
| H | 0.955465  | 2.539267  | 2.354816  |
| H | 3.225629  | 2.017800  | 1.601300  |
| H | 2.842559  | 2.486427  | -0.038306 |
| H | 2.285856  | -2.356858 | 2.233589  |
| H | 2.391033  | -2.237181 | 0.514506  |
| H | -0.100907 | -1.719572 | 2.226143  |
| H | 0.291195  | -3.225656 | 1.383467  |
| H | -1.068276 | 3.069527  | 2.226767  |
| H | -1.009503 | 4.515770  | 1.214778  |
| H | -2.491255 | 3.221598  | -0.476316 |
| H | -3.188706 | 3.771249  | 1.013609  |
| H | -2.813283 | 1.460507  | 2.007542  |
| H | -4.104876 | 1.657594  | 0.816631  |
| H | -2.588348 | -0.287035 | -1.779314 |
| H | -4.114403 | 0.354356  | -1.125921 |
| H | -2.822785 | 1.441309  | -1.695425 |
| H | -2.415485 | -0.605556 | 1.921287  |
| H | -3.733118 | -1.043874 | 0.817322  |
| H | -2.223829 | -2.166274 | -0.690283 |
| H | -2.001627 | -2.799298 | 0.923256  |
| H | 1.151143  | -2.151784 | -1.233587 |
| H | -0.067575 | -3.410984 | -0.994423 |
| H | -0.452330 | -1.954921 | -1.931710 |
| H | 2.651728  | -0.777250 | -1.018928 |
| H | 2.553179  | 0.895468  | -1.547756 |
| H | 3.922112  | 0.353469  | -0.538132 |
| H | 1.138911  | 3.166814  | -1.324148 |
| H | -0.547560 | 3.599344  | -1.393502 |
| H | 0.583824  | 4.661856  | -0.519780 |
| H | 3.458991  | -0.384810 | 1.728538  |
| H | 1.944438  | 0.047827  | 2.504986  |
| O | -0.043889 | 0.853099  | -1.650864 |
| H | 0.164358  | 0.244285  | -2.362363 |
| H | -0.360375 | 0.922624  | 5.393623  |
| H | 1.192873  | -0.110689 | 5.427339  |
| H | 1.311833  | 1.746843  | 5.298394  |

$5\pi\text{IN}^-[\text{Fe}^{\text{IV}}=\text{O}(\text{TMC})(\text{OH})]^+$

|    |           |           |           |
|----|-----------|-----------|-----------|
| Fe | -0.196417 | 0.825924  | 0.069488  |
| O  | -0.435958 | 1.256046  | 1.825707  |
| C  | -1.605943 | 0.149525  | 4.958257  |
| H  | -0.752929 | 0.614689  | 2.467627  |
| N  | -2.388013 | 0.721352  | -0.073598 |
| C  | -3.008256 | 1.979481  | 0.447943  |
| C  | -2.708133 | -0.412854 | 0.837879  |
| C  | -2.908129 | 0.436857  | -1.430801 |
| N  | 0.076591  | 3.074843  | -0.114021 |
| C  | 1.235552  | 3.263904  | 0.797230  |
| C  | -1.124694 | 3.777366  | 0.417829  |
| C  | 0.392474  | 3.571473  | -1.468171 |
| C  | -2.466146 | 3.287250  | -0.141411 |
| N  | 1.994938  | 0.849399  | 0.426452  |
| C  | 2.381660  | 2.295954  | 0.500307  |
| C  | 2.230541  | 0.157546  | 1.731082  |
| C  | 2.814867  | 0.224931  | -0.640384 |
| N  | -0.394082 | -1.426767 | 0.473842  |
| C  | -1.865749 | -1.662387 | 0.567659  |
| C  | 0.309555  | -1.712592 | 1.755997  |
| C  | 0.132469  | -2.306285 | -0.598193 |
| C  | 1.797071  | -1.318144 | 1.811926  |
| H  | 1.627080  | 4.286374  | 0.715501  |
| H  | 0.876165  | 3.116558  | 1.810480  |
| H  | 3.157499  | 2.434762  | 1.260256  |
| H  | 2.836222  | 2.556652  | -0.454148 |
| H  | 2.151244  | -1.667061 | 2.786608  |
| H  | 2.360818  | -1.912355 | 1.091446  |
| H  | -0.233693 | -1.224447 | 2.565156  |
| H  | 0.248278  | -2.791297 | 1.958250  |
| H  | -1.127772 | 3.642249  | 1.497594  |
| H  | -1.023314 | 4.851921  | 0.217507  |
| H  | -2.453540 | 3.255731  | -1.233895 |
| H  | -3.202823 | 4.057207  | 0.105714  |
| H  | -2.850625 | 1.994619  | 1.524392  |
| H  | -4.089461 | 1.924914  | 0.269101  |
| H  | -2.406593 | -0.425053 | -1.860368 |
| H  | -3.987694 | 0.251770  | -1.394445 |
| H  | -2.730790 | 1.287067  | -2.086135 |
| H  | -2.568730 | -0.065703 | 1.858278  |
| H  | -3.765034 | -0.689949 | 0.738206  |
| H  | -2.184063 | -2.105513 | -0.374358 |
| H  | -2.087665 | -2.402667 | 1.344822  |
| H  | 1.213283  | -2.240674 | -0.655782 |
| H  | -0.137459 | -3.351431 | -0.405956 |
| H  | -0.263659 | -1.985637 | -1.557313 |
| H  | 2.605368  | -0.835495 | -0.719788 |
| H  | 2.567383  | 0.674395  | -1.596937 |
| H  | 3.881619  | 0.355522  | -0.425804 |
| H  | 1.209382  | 3.003974  | -1.906577 |
| H  | -0.473950 | 3.466599  | -2.119969 |
| H  | 0.668749  | 4.632492  | -1.440138 |
| H  | 3.307533  | 0.190171  | 1.943863  |
| H  | 1.721156  | 0.736534  | 2.496772  |
| O  | 0.081153  | 0.487218  | -1.683418 |

---

|   |           |           |           |
|---|-----------|-----------|-----------|
| H | -0.351390 | 1.070278  | -2.315341 |
| H | -0.567291 | 0.229848  | 5.243133  |
| H | -2.182204 | 1.049338  | 4.800280  |
| H | -2.112015 | -0.800258 | 5.049877  |

## The optimized geometries in acetonitrile.

Cat

$^3[\text{Fe}^{\text{IV}}=\text{O}(\text{TMC})(\text{SR})]^+$

|    |           |           |           |
|----|-----------|-----------|-----------|
| Fe | -0.133914 | 0.654682  | 0.213278  |
| O  | -0.180311 | 0.630706  | 1.868574  |
| N  | -2.279916 | 0.612160  | 0.306411  |
| C  | -2.820188 | 1.683067  | 1.198534  |
| C  | -2.504151 | -0.705004 | 0.975023  |
| C  | -3.044233 | 0.655421  | -0.969573 |
| N  | 0.084869  | 2.755703  | 0.353456  |
| C  | 1.365609  | 2.886638  | 1.117926  |
| C  | -0.972104 | 3.421023  | 1.181723  |
| C  | 0.187145  | 3.471638  | -0.946065 |
| C  | -2.409179 | 3.095705  | 0.807175  |
| N  | 2.065673  | 0.622426  | 0.289151  |
| C  | 2.461598  | 2.054104  | 0.504713  |
| C  | 2.417157  | -0.214603 | 1.481155  |
| C  | 2.896920  | 0.166030  | -0.862651 |
| N  | -0.263330 | -1.431238 | 0.128798  |
| C  | -1.718350 | -1.789946 | 0.277098  |
| C  | 0.498765  | -2.013684 | 1.286312  |
| C  | 0.222984  | -2.023917 | -1.159365 |
| C  | 1.991548  | -1.680914 | 1.369659  |
| H  | 1.674631  | 3.936824  | 1.139472  |
| H  | 1.164422  | 2.566057  | 2.135386  |
| H  | 3.354624  | 2.098268  | 1.134161  |
| H  | 2.739212  | 2.462538  | -0.464877 |
| H  | 2.344499  | -2.167678 | 2.283386  |
| H  | 2.536401  | -2.172915 | 0.563390  |
| H  | -0.002866 | -1.674029 | 2.188597  |
| H  | 0.397481  | -3.102806 | 1.228093  |
| H  | -0.807360 | 3.117577  | 2.213468  |
| H  | -0.803476 | 4.500692  | 1.118847  |
| H  | -2.616740 | 3.306640  | -0.243430 |
| H  | -3.042419 | 3.782315  | 1.374946  |
| H  | -2.467092 | 1.475811  | 2.206140  |
| H  | -3.911417 | 1.595718  | 1.196475  |
| H  | -2.749194 | -0.152437 | -1.627160 |
| H  | -4.111820 | 0.568080  | -0.745899 |
| H  | -2.856955 | 1.588408  | -1.489838 |
| H  | -2.186171 | -0.604150 | 2.008579  |
| H  | -3.569736 | -0.954910 | 0.961782  |
| H  | -2.124967 | -1.968238 | -0.714870 |
| H  | -1.806632 | -2.729047 | 0.827415  |
| H  | 2.779439  | -0.893900 | -1.045375 |
| H  | 2.601904  | 0.700507  | -1.758796 |
| H  | 3.949727  | 0.359564  | -0.634397 |
| H  | 0.957476  | 3.027916  | -1.568797 |
| H  | -0.757792 | 3.405706  | -1.478489 |
| H  | 0.427508  | 4.523756  | -0.768519 |

---

|                                                                 |           |           |           |
|-----------------------------------------------------------------|-----------|-----------|-----------|
| H                                                               | 3.505941  | -0.181780 | 1.602498  |
| H                                                               | 1.960680  | 0.242681  | 2.353610  |
| S                                                               | -0.077229 | 0.558757  | -2.172176 |
| C                                                               | -0.277008 | -1.267034 | -2.376997 |
| H                                                               | 0.298634  | -1.587607 | -3.245961 |
| H                                                               | -1.322000 | -1.497220 | -2.590329 |
| H                                                               | 1.305708  | -2.020804 | -1.147345 |
| H                                                               | -0.094606 | -3.072497 | -1.197200 |
| ${}^5[\text{Fe}^{\text{IV}}=\text{O}(\text{TMC})(\text{SR})]^+$ |           |           |           |
| Fe                                                              | -0.157119 | 0.669649  | 0.196936  |
| O                                                               | -0.202392 | 0.645405  | 1.857635  |
| N                                                               | -2.416873 | 0.577917  | 0.297292  |
| C                                                               | -2.886344 | 1.696920  | 1.165013  |
| C                                                               | -2.551720 | -0.726841 | 0.999508  |
| C                                                               | -3.210211 | 0.574459  | -0.952085 |
| N                                                               | 0.132070  | 2.818399  | 0.344198  |
| C                                                               | 1.393383  | 2.898641  | 1.146584  |
| C                                                               | -0.973337 | 3.434947  | 1.151161  |
| C                                                               | 0.277245  | 3.554284  | -0.935535 |
| C                                                               | -2.399925 | 3.082179  | 0.727542  |
| N                                                               | 2.183152  | 0.640502  | 0.294441  |
| C                                                               | 2.526342  | 2.069724  | 0.561147  |
| C                                                               | 2.472426  | -0.232419 | 1.470695  |
| C                                                               | 3.010435  | 0.212507  | -0.858930 |
| N                                                               | -0.279949 | -1.484440 | 0.131274  |
| C                                                               | -1.734523 | -1.821596 | 0.319178  |
| C                                                               | 0.522540  | -2.035052 | 1.275452  |
| C                                                               | 0.188116  | -2.047482 | -1.172786 |
| C                                                               | 2.020280  | -1.692737 | 1.318137  |
| H                                                               | 1.721186  | 3.942321  | 1.204158  |
| H                                                               | 1.154559  | 2.560120  | 2.150146  |
| H                                                               | 3.384943  | 2.130154  | 1.237996  |
| H                                                               | 2.844293  | 2.506860  | -0.383803 |
| H                                                               | 2.396590  | -2.210617 | 2.205442  |
| H                                                               | 2.540290  | -2.163261 | 0.483077  |
| H                                                               | 0.043454  | -1.682483 | 2.185901  |
| H                                                               | 0.430635  | -3.126969 | 1.245891  |
| H                                                               | -0.829022 | 3.121984  | 2.183249  |
| H                                                               | -0.838959 | 4.521039  | 1.110629  |
| H                                                               | -2.550566 | 3.239341  | -0.342918 |
| H                                                               | -3.048416 | 3.811539  | 1.219671  |
| H                                                               | -2.537321 | 1.499653  | 2.176600  |
| H                                                               | -3.982254 | 1.682710  | 1.180243  |
| H                                                               | -2.902429 | -0.235281 | -1.604641 |
| H                                                               | -4.272918 | 0.455972  | -0.713151 |
| H                                                               | -3.065528 | 1.505331  | -1.492832 |
| H                                                               | -2.217924 | -0.586406 | 2.023624  |
| H                                                               | -3.600617 | -1.043616 | 1.020632  |
| H                                                               | -2.154686 | -2.036937 | -0.660196 |
| H                                                               | -1.816595 | -2.740494 | 0.904312  |
| H                                                               | 2.855974  | -0.835983 | -1.087107 |
| H                                                               | 2.737280  | 0.788731  | -1.738237 |
| H                                                               | 4.072463  | 0.362927  | -0.632281 |
| H                                                               | 1.056864  | 3.107919  | -1.546265 |
| H                                                               | -0.655208 | 3.512668  | -1.493545 |
| H                                                               | 0.529667  | 4.600544  | -0.737259 |

---

|   |           |           |           |
|---|-----------|-----------|-----------|
| H | 3.556908  | -0.231923 | 1.641819  |
| H | 1.994062  | 0.211652  | 2.339688  |
| S | -0.101683 | 0.556908  | -2.151321 |
| C | -0.341950 | -1.267719 | -2.362369 |
| H | 0.199454  | -1.577279 | -3.256790 |
| H | -1.397178 | -1.473168 | -2.543346 |
| H | 1.272269  | -2.019999 | -1.180048 |
| H | -0.111833 | -3.100443 | -1.236703 |

$^3[\text{Fe}^{\text{IV}}=\text{O}(\text{TMC})(\text{OH})]^+$

|    |           |           |           |
|----|-----------|-----------|-----------|
| Fe | -0.114746 | 0.647423  | 0.223717  |
| O  | -0.167121 | 0.611931  | 1.881183  |
| N  | -2.231971 | 0.584692  | 0.264240  |
| C  | -2.848568 | 1.665395  | 1.090821  |
| C  | -2.489880 | -0.709818 | 0.962703  |
| C  | -2.869874 | 0.582319  | -1.076806 |
| N  | 0.084605  | 2.746231  | 0.372763  |
| C  | 1.359956  | 2.879278  | 1.139643  |
| C  | -0.991201 | 3.393758  | 1.182191  |
| C  | 0.194417  | 3.452276  | -0.930344 |
| C  | -2.411997 | 3.079337  | 0.737350  |
| N  | 2.036904  | 0.625924  | 0.270093  |
| C  | 2.453683  | 2.050276  | 0.512175  |
| C  | 2.453125  | -0.235821 | 1.422846  |
| C  | 2.763109  | 0.197913  | -0.955981 |
| N  | -0.247250 | -1.504565 | 0.162578  |
| C  | -1.706775 | -1.832832 | 0.327158  |
| C  | 0.529096  | -2.025628 | 1.335855  |
| C  | 0.189448  | -2.220144 | -1.066554 |
| C  | 2.025102  | -1.702221 | 1.329049  |
| H  | 1.668555  | 3.929719  | 1.167335  |
| H  | 1.160475  | 2.548821  | 2.154312  |
| H  | 3.344783  | 2.069902  | 1.144392  |
| H  | 2.737661  | 2.476151  | -0.447636 |
| H  | 2.437820  | -2.189527 | 2.217137  |
| H  | 2.517114  | -2.190325 | 0.486649  |
| H  | 0.067038  | -1.618243 | 2.230510  |
| H  | 0.413391  | -3.115311 | 1.350473  |
| H  | -0.863509 | 3.060703  | 2.210599  |
| H  | -0.820871 | 4.474984  | 1.153781  |
| H  | -2.568204 | 3.302651  | -0.319538 |
| H  | -3.072019 | 3.759523  | 1.281901  |
| H  | -2.583832 | 1.466134  | 2.127433  |
| H  | -3.935933 | 1.574901  | 0.996441  |
| H  | -2.443274 | -0.192245 | -1.702523 |
| H  | -3.946664 | 0.421823  | -0.963750 |
| H  | -2.692715 | 1.531361  | -1.572150 |
| H  | -2.198823 | -0.578030 | 2.000309  |
| H  | -3.558625 | -0.945875 | 0.925832  |
| H  | -2.107227 | -2.052648 | -0.660145 |
| H  | -1.813683 | -2.743434 | 0.921749  |
| H  | 1.248963  | -2.092827 | -1.248939 |
| H  | -0.010301 | -3.290161 | -0.955525 |
| H  | -0.365666 | -1.852578 | -1.925680 |
| H  | 2.609852  | -0.853475 | -1.163171 |
| H  | 2.413051  | 0.778766  | -1.804056 |
| H  | 3.835982  | 0.362897  | -0.818238 |



---

|   |           |           |           |
|---|-----------|-----------|-----------|
| H | 0.957112  | 2.994983  | -1.547901 |
| H | -0.744044 | 3.379497  | -1.470772 |
| H | 0.432186  | 4.504774  | -0.749355 |
| H | 3.546854  | -0.200290 | 1.486630  |
| H | 2.041366  | 0.212396  | 2.322771  |
| O | -0.100737 | 0.782979  | -1.669230 |
| H | 0.315113  | 0.047033  | -2.125887 |

$^5[\text{Fe}^{\text{IV}}=\text{O}(\text{TMC})(\text{OH})]^+$

|    |           |           |           |
|----|-----------|-----------|-----------|
| Fe | -0.129321 | 0.678750  | 0.192953  |
| O  | -0.182732 | 0.643135  | 1.845660  |
| N  | -2.325703 | 0.546540  | 0.253995  |
| C  | -2.879158 | 1.666575  | 1.073264  |
| C  | -2.518337 | -0.741221 | 0.976114  |
| C  | -2.986873 | 0.517160  | -1.068801 |
| N  | 0.128980  | 2.854068  | 0.372468  |
| C  | 1.391827  | 2.914911  | 1.161739  |
| C  | -0.991783 | 3.437697  | 1.168483  |
| C  | 0.270986  | 3.583260  | -0.907646 |
| C  | -2.397506 | 3.067901  | 0.686864  |
| N  | 2.117139  | 0.638293  | 0.276398  |
| C  | 2.498043  | 2.063151  | 0.549997  |
| C  | 2.484050  | -0.249422 | 1.421371  |
| C  | 2.834651  | 0.223408  | -0.953023 |
| N  | -0.263912 | -1.583832 | 0.151057  |
| C  | -1.721430 | -1.879223 | 0.350106  |
| C  | 0.539174  | -2.052920 | 1.325500  |
| C  | 0.165823  | -2.300870 | -1.073415 |
| C  | 2.036559  | -1.713099 | 1.296612  |
| H  | 1.747390  | 3.950093  | 1.219502  |
| H  | 1.162036  | 2.575445  | 2.167333  |
| H  | 3.367880  | 2.089989  | 1.212547  |
| H  | 2.810682  | 2.501148  | -0.395804 |
| H  | 2.462991  | -2.220302 | 2.167134  |
| H  | 2.515717  | -2.184747 | 0.437646  |
| H  | 0.084645  | -1.627055 | 2.216360  |
| H  | 0.442158  | -3.144310 | 1.381734  |
| H  | -0.870095 | 3.099045  | 2.196071  |
| H  | -0.879929 | 4.527907  | 1.161131  |
| H  | -2.512079 | 3.247896  | -0.384348 |
| H  | -3.081576 | 3.769553  | 1.171098  |
| H  | -2.606706 | 1.473625  | 2.109247  |
| H  | -3.972271 | 1.626766  | 1.002218  |
| H  | -2.571418 | -0.271839 | -1.687491 |
| H  | -4.062745 | 0.353177  | -0.942841 |
| H  | -2.822277 | 1.457404  | -1.586990 |
| H  | -2.211039 | -0.583562 | 2.005859  |
| H  | -3.578181 | -1.019940 | 0.971385  |
| H  | -2.139358 | -2.122801 | -0.624800 |
| H  | -1.835192 | -2.772034 | 0.971625  |
| H  | 1.216663  | -2.131644 | -1.280837 |
| H  | 0.007830  | -3.378682 | -0.957775 |
| H  | -0.417471 | -1.960941 | -1.927350 |
| H  | 2.660270  | -0.823898 | -1.172890 |
| H  | 2.479322  | 0.814119  | -1.793098 |
| H  | 3.912877  | 0.371317  | -0.828107 |
| H  | 1.035955  | 3.123372  | -1.523642 |

---

|                                                                                |           |           |           |
|--------------------------------------------------------------------------------|-----------|-----------|-----------|
| H                                                                              | -0.661398 | 3.541421  | -1.463893 |
| H                                                                              | 0.528860  | 4.629337  | -0.710531 |
| H                                                                              | 3.576546  | -0.236853 | 1.524321  |
| H                                                                              | 2.055315  | 0.188510  | 2.319522  |
| O                                                                              | -0.095400 | 0.842228  | -1.678703 |
| H                                                                              | 0.110771  | 0.032748  | -2.156892 |
| <b><math>^3[\text{Fe}^{\text{IV}}=\text{O}(\text{TMC})(\text{F})]^+</math></b> |           |           |           |
| Fe                                                                             | -0.120485 | 0.641148  | 0.284475  |
| O                                                                              | -0.165097 | 0.609621  | 1.926816  |
| N                                                                              | -2.220523 | 0.586554  | 0.286496  |
| C                                                                              | -2.856686 | 1.673267  | 1.090834  |
| C                                                                              | -2.498558 | -0.705276 | 0.982672  |
| C                                                                              | -2.814349 | 0.579792  | -1.076304 |
| N                                                                              | 0.076666  | 2.729817  | 0.386628  |
| C                                                                              | 1.350830  | 2.886647  | 1.150537  |
| C                                                                              | -1.000190 | 3.404593  | 1.172537  |
| C                                                                              | 0.187727  | 3.381709  | -0.945046 |
| C                                                                              | -2.420247 | 3.085266  | 0.730313  |
| N                                                                              | 2.013625  | 0.629345  | 0.285279  |
| C                                                                              | 2.445802  | 2.049925  | 0.535720  |
| C                                                                              | 2.462541  | -0.248183 | 1.414370  |
| C                                                                              | 2.686228  | 0.216423  | -0.978030 |
| N                                                                              | -0.251993 | -1.488345 | 0.187650  |
| C                                                                              | -1.709526 | -1.828573 | 0.355389  |
| C                                                                              | 0.540132  | -2.044442 | 1.332127  |
| C                                                                              | 0.172029  | -2.138287 | -1.084157 |
| C                                                                              | 2.034923  | -1.714397 | 1.317081  |
| H                                                                              | 1.652559  | 3.939068  | 1.159137  |
| H                                                                              | 1.152556  | 2.574291  | 2.171477  |
| H                                                                              | 3.328041  | 2.057547  | 1.179328  |
| H                                                                              | 2.747348  | 2.475299  | -0.418745 |
| H                                                                              | 2.456612  | -2.205366 | 2.198824  |
| H                                                                              | 2.521713  | -2.195404 | 0.468058  |
| H                                                                              | 0.086555  | -1.670081 | 2.245958  |
| H                                                                              | 0.430117  | -3.134460 | 1.313410  |
| H                                                                              | -0.877408 | 3.099793  | 2.210470  |
| H                                                                              | -0.823933 | 4.483476  | 1.114683  |
| H                                                                              | -2.578295 | 3.304467  | -0.327044 |
| H                                                                              | -3.080313 | 3.767376  | 1.272179  |
| H                                                                              | -2.610697 | 1.484371  | 2.134234  |
| H                                                                              | -3.941308 | 1.576343  | 0.976710  |
| H                                                                              | -2.361553 | -0.191193 | -1.688165 |
| H                                                                              | -3.892304 | 0.409110  | -0.999734 |
| H                                                                              | -2.632731 | 1.532364  | -1.563414 |
| H                                                                              | -2.222257 | -0.573581 | 2.024725  |
| H                                                                              | -3.567916 | -0.933808 | 0.930394  |
| H                                                                              | -2.108758 | -2.057409 | -0.630124 |
| H                                                                              | -1.808290 | -2.735676 | 0.955719  |
| H                                                                              | 1.246537  | -2.106644 | -1.204770 |
| H                                                                              | -0.137101 | -3.187327 | -1.072646 |
| H                                                                              | -0.285943 | -1.622144 | -1.921746 |
| H                                                                              | 2.565755  | -0.842321 | -1.161967 |
| H                                                                              | 2.253059  | 0.762187  | -1.810141 |
| H                                                                              | 3.756120  | 0.430920  | -0.902619 |
| H                                                                              | 0.951250  | 2.901064  | -1.544786 |
| H                                                                              | -0.752058 | 3.292803  | -1.480578 |

---

|                                                                |           |           |           |
|----------------------------------------------------------------|-----------|-----------|-----------|
| H                                                              | 0.431332  | 4.439418  | -0.809338 |
| H                                                              | 3.557340  | -0.212501 | 1.447101  |
| H                                                              | 2.078334  | 0.190942  | 2.331256  |
| F                                                              | -0.093489 | 0.695948  | -1.590039 |
| ${}^5[\text{Fe}^{\text{IV}}=\text{O}(\text{TMC})(\text{F})]^+$ |           |           |           |
| Fe                                                             | -0.138002 | 0.660960  | 0.255312  |
| O                                                              | -0.182021 | 0.629194  | 1.891742  |
| N                                                              | -2.322360 | 0.553691  | 0.275208  |
| C                                                              | -2.895068 | 1.679522  | 1.073336  |
| C                                                              | -2.534200 | -0.730830 | 0.999500  |
| C                                                              | -2.942099 | 0.516510  | -1.068754 |
| N                                                              | 0.117369  | 2.830596  | 0.382029  |
| C                                                              | 1.379015  | 2.920568  | 1.169686  |
| C                                                              | -1.002249 | 3.443463  | 1.158495  |
| C                                                              | 0.257747  | 3.506324  | -0.928195 |
| C                                                              | -2.409651 | 3.077174  | 0.681569  |
| N                                                              | 2.095376  | 0.645616  | 0.285045  |
| C                                                              | 2.490491  | 2.064993  | 0.573573  |
| C                                                              | 2.493958  | -0.262600 | 1.405659  |
| C                                                              | 2.765837  | 0.248534  | -0.977776 |
| N                                                              | -0.273375 | -1.569471 | 0.182995  |
| C                                                              | -1.729009 | -1.873414 | 0.391241  |
| C                                                              | 0.553529  | -2.077419 | 1.322136  |
| C                                                              | 0.132712  | -2.216538 | -1.089401 |
| C                                                              | 2.048432  | -1.726540 | 1.273134  |
| H                                                              | 1.724069  | 3.959829  | 1.207979  |
| H                                                              | 1.151172  | 2.599436  | 2.182055  |
| H                                                              | 3.347211  | 2.078295  | 1.252169  |
| H                                                              | 2.825743  | 2.505806  | -0.362956 |
| H                                                              | 2.492598  | -2.240220 | 2.130823  |
| H                                                              | 2.515883  | -2.185444 | 0.401347  |
| H                                                              | 0.114371  | -1.687197 | 2.237323  |
| H                                                              | 0.464779  | -3.170481 | 1.342773  |
| H                                                              | -0.886839 | 3.129123  | 2.194746  |
| H                                                              | -0.878629 | 4.531665  | 1.125065  |
| H                                                              | -2.528911 | 3.256929  | -0.388965 |
| H                                                              | -3.088983 | 3.782089  | 1.167662  |
| H                                                              | -2.642085 | 1.497098  | 2.116499  |
| H                                                              | -3.986206 | 1.635070  | 0.982221  |
| H                                                              | -2.491732 | -0.262233 | -1.675686 |
| H                                                              | -4.017851 | 0.333582  | -0.976426 |
| H                                                              | -2.780992 | 1.462700  | -1.577730 |
| H                                                              | -2.246450 | -0.569353 | 2.034534  |
| H                                                              | -3.594764 | -1.004379 | 0.975756  |
| H                                                              | -2.147245 | -2.135932 | -0.578395 |
| H                                                              | -1.833677 | -2.755773 | 1.027975  |
| H                                                              | 1.199700  | -2.121425 | -1.252539 |
| H                                                              | -0.117124 | -3.282450 | -1.063818 |
| H                                                              | -0.381089 | -1.738199 | -1.918665 |
| H                                                              | 2.586294  | -0.795761 | -1.202908 |
| H                                                              | 2.373490  | 0.843797  | -1.797783 |
| H                                                              | 3.846701  | 0.402628  | -0.892292 |
| H                                                              | 1.032321  | 3.031477  | -1.521534 |
| H                                                              | -0.672107 | 3.433371  | -1.485455 |
| H                                                              | 0.506954  | 4.561654  | -0.776235 |
| H                                                              | 3.588473  | -0.249151 | 1.477758  |

---

|                                                                            |           |           |           |
|----------------------------------------------------------------------------|-----------|-----------|-----------|
| H                                                                          | 2.091600  | 0.162707  | 2.322244  |
| F                                                                          | -0.119385 | 0.725884  | -1.600887 |
| $^3[\text{Fe}^{\text{IV}}=\text{O}(\text{TMC})(\text{CF}_3\text{CO}_2)]^+$ |           |           |           |
| Fe                                                                         | -0.145333 | 0.672253  | 0.212487  |
| O                                                                          | -0.169561 | 0.618120  | 1.836086  |
| N                                                                          | -2.258257 | 0.585339  | 0.300036  |
| C                                                                          | -2.859650 | 1.676766  | 1.128657  |
| C                                                                          | -2.490366 | -0.706152 | 1.018792  |
| C                                                                          | -2.953783 | 0.554064  | -1.014689 |
| N                                                                          | 0.080183  | 2.767144  | 0.405189  |
| C                                                                          | 1.349571  | 2.877132  | 1.189651  |
| C                                                                          | -1.005214 | 3.406010  | 1.212894  |
| C                                                                          | 0.220486  | 3.516150  | -0.873341 |
| C                                                                          | -2.420400 | 3.084943  | 0.756661  |
| N                                                                          | 2.010257  | 0.657212  | 0.244325  |
| C                                                                          | 2.442094  | 2.070117  | 0.535551  |
| C                                                                          | 2.440119  | -0.231929 | 1.375999  |
| C                                                                          | 2.733071  | 0.253894  | -0.994099 |
| N                                                                          | -0.276078 | -1.479935 | 0.145364  |
| C                                                                          | -1.727681 | -1.823373 | 0.352704  |
| C                                                                          | 0.528052  | -2.018332 | 1.293901  |
| C                                                                          | 0.136188  | -2.178029 | -1.104153 |
| C                                                                          | 2.020612  | -1.695619 | 1.258895  |
| H                                                                          | 1.652572  | 3.926754  | 1.251229  |
| H                                                                          | 1.146460  | 2.518364  | 2.194026  |
| H                                                                          | 3.329609  | 2.057695  | 1.171360  |
| H                                                                          | 2.735404  | 2.527442  | -0.406520 |
| H                                                                          | 2.454556  | -2.199204 | 2.127304  |
| H                                                                          | 2.494375  | -2.162500 | 0.395003  |
| H                                                                          | 0.085006  | -1.634750 | 2.208813  |
| H                                                                          | 0.410773  | -3.106949 | 1.288013  |
| H                                                                          | -0.880593 | 3.074470  | 2.242251  |
| H                                                                          | -0.837472 | 4.486722  | 1.186751  |
| H                                                                          | -2.563136 | 3.289967  | -0.306058 |
| H                                                                          | -3.086733 | 3.773627  | 1.281610  |
| H                                                                          | -2.588011 | 1.483180  | 2.164609  |
| H                                                                          | -3.946904 | 1.587486  | 1.044860  |
| H                                                                          | -2.548842 | -0.230890 | -1.644459 |
| H                                                                          | -4.018039 | 0.364367  | -0.852246 |
| H                                                                          | -2.824380 | 1.499844  | -1.528053 |
| H                                                                          | -2.167899 | -0.571851 | 2.046837  |
| H                                                                          | -3.559400 | -0.939038 | 1.018384  |
| H                                                                          | -2.157713 | -2.043780 | -0.621722 |
| H                                                                          | -1.806760 | -2.736123 | 0.946810  |
| H                                                                          | 1.189881  | -2.039602 | -1.306487 |
| H                                                                          | -0.058323 | -3.248662 | -0.994230 |
| H                                                                          | -0.429117 | -1.792279 | -1.943470 |
| H                                                                          | 2.531071  | -0.776614 | -1.253309 |
| H                                                                          | 2.424471  | 0.883489  | -1.819883 |
| H                                                                          | 3.808544  | 0.367051  | -0.831002 |
| H                                                                          | 1.001171  | 3.081812  | -1.488281 |
| H                                                                          | -0.707477 | 3.478731  | -1.431977 |
| H                                                                          | 0.478541  | 4.555223  | -0.652648 |
| O                                                                          | -0.067929 | 0.681318  | -1.838165 |
| C                                                                          | -0.462593 | 1.151335  | -2.950767 |
| O                                                                          | -1.259115 | 2.044004  | -3.202060 |

---

|   |           |           |           |
|---|-----------|-----------|-----------|
| C | 0.202295  | 0.427816  | -4.174573 |
| F | -0.176384 | 0.958905  | -5.347001 |
| F | 1.552103  | 0.495455  | -4.120724 |
| F | -0.130826 | -0.884405 | -4.203855 |
| H | 3.533398  | -0.189751 | 1.422553  |
| H | 2.045495  | 0.196924  | 2.293088  |

$^5[\text{Fe}^{\text{IV}}=\text{O}(\text{TMC})(\text{CF}_3\text{CO}_2)]^+$

|    |           |           |           |
|----|-----------|-----------|-----------|
| Fe | -0.163284 | 0.693047  | 0.163031  |
| O  | -0.195137 | 0.647831  | 1.786644  |
| N  | -2.357397 | 0.542366  | 0.270639  |
| C  | -2.891120 | 1.675432  | 1.092021  |
| C  | -2.520096 | -0.740344 | 1.016593  |
| C  | -3.090844 | 0.479599  | -1.017029 |
| N  | 0.131578  | 2.864591  | 0.381755  |
| C  | 1.387034  | 2.903655  | 1.188754  |
| C  | -0.999047 | 3.437656  | 1.179170  |
| C  | 0.302908  | 3.649633  | -0.865924 |
| C  | -2.400111 | 3.067437  | 0.685294  |
| N  | 2.097992  | 0.658242  | 0.247535  |
| C  | 2.492078  | 2.073586  | 0.552625  |
| C  | 2.465153  | -0.240876 | 1.388619  |
| C  | 2.829894  | 0.248554  | -0.977404 |
| N  | -0.285167 | -1.568014 | 0.145685  |
| C  | -1.737265 | -1.873312 | 0.369043  |
| C  | 0.533259  | -2.045936 | 1.306002  |
| C  | 0.130302  | -2.274918 | -1.091659 |
| C  | 2.027032  | -1.703996 | 1.258403  |
| H  | 1.735287  | 3.937808  | 1.279329  |
| H  | 1.152045  | 2.536997  | 2.183607  |
| H  | 3.363132  | 2.078108  | 1.212967  |
| H  | 2.805264  | 2.534198  | -0.382039 |
| H  | 2.467550  | -2.214239 | 2.119807  |
| H  | 2.496360  | -2.166257 | 0.389516  |
| H  | 0.089776  | -1.635299 | 2.209989  |
| H  | 0.436628  | -3.137102 | 1.350628  |
| H  | -0.880750 | 3.095744  | 2.206021  |
| H  | -0.886495 | 4.526581  | 1.177913  |
| H  | -2.498772 | 3.227016  | -0.390831 |
| H  | -3.086524 | 3.780693  | 1.147886  |
| H  | -2.612014 | 1.487535  | 2.127181  |
| H  | -3.983820 | 1.641334  | 1.031831  |
| H  | -2.683599 | -0.302109 | -1.652310 |
| H  | -4.146755 | 0.265069  | -0.826671 |
| H  | -3.000334 | 1.423892  | -1.543340 |
| H  | -2.186785 | -0.574115 | 2.036769  |
| H  | -3.578391 | -1.019509 | 1.043995  |
| H  | -2.172805 | -2.113642 | -0.598807 |
| H  | -1.833602 | -2.769301 | 0.987862  |
| H  | 1.181707  | -2.113604 | -1.299110 |
| H  | -0.041764 | -3.350480 | -0.979613 |
| H  | -0.442001 | -1.904705 | -1.935663 |
| H  | 2.604832  | -0.778077 | -1.241311 |
| H  | 2.539419  | 0.883645  | -1.808002 |
| H  | 3.908488  | 0.337894  | -0.811878 |
| H  | 1.082221  | 3.216329  | -1.486266 |
| H  | -0.620154 | 3.649326  | -1.435754 |

---

|   |           |           |           |
|---|-----------|-----------|-----------|
| H | 0.580443  | 4.678095  | -0.615692 |
| O | -0.056316 | 0.669771  | -1.830311 |
| C | -0.496408 | 1.182579  | -2.913592 |
| O | -1.302516 | 2.078236  | -3.092571 |
| C | 0.137615  | 0.502479  | -4.174508 |
| F | -0.302773 | 1.047751  | -5.316745 |
| F | 1.485007  | 0.611562  | -4.165956 |
| F | -0.158876 | -0.816524 | -4.215972 |
| H | 3.557128  | -0.221510 | 1.485616  |
| H | 2.043184  | 0.190949  | 2.293148  |

### TS<sub>H</sub>

#### <sup>36</sup>TS<sub>H</sub>-[Fe<sup>IV</sup>=O(TMC)(SR)]<sup>+</sup>

|    |           |           |           |
|----|-----------|-----------|-----------|
| Fe | -0.207662 | 0.665847  | 0.321103  |
| O  | -0.576976 | 0.590865  | 2.074948  |
| C  | 0.302309  | 0.976997  | 4.395255  |
| H  | -0.061039 | 0.799489  | 3.147032  |
| N  | -2.581235 | 0.579583  | 0.291894  |
| C  | -3.081216 | 1.706118  | 1.117738  |
| C  | -2.731250 | -0.733321 | 0.960329  |
| C  | -3.288539 | 0.580898  | -1.000684 |
| N  | 0.065126  | 2.751042  | 0.480642  |
| C  | 1.293975  | 2.865345  | 1.331191  |
| C  | -1.083843 | 3.373425  | 1.229663  |
| C  | 0.263427  | 3.492304  | -0.791362 |
| C  | -2.495585 | 3.067881  | 0.719851  |
| N  | 2.171403  | 0.631309  | 0.503942  |
| C  | 2.476397  | 2.056228  | 0.809790  |
| C  | 2.391210  | -0.266292 | 1.668962  |
| C  | 3.051569  | 0.223717  | -0.612528 |
| N  | -0.361104 | -1.432651 | 0.225244  |
| C  | -1.825425 | -1.795015 | 0.333196  |
| C  | 0.396388  | -2.020478 | 1.383559  |
| C  | 0.170509  | -1.989201 | -1.061379 |
| C  | 1.900770  | -1.711259 | 1.480219  |
| H  | 1.595186  | 3.917056  | 1.391762  |
| H  | 1.020498  | 2.546508  | 2.330450  |
| H  | 3.291365  | 2.132175  | 1.539381  |
| H  | 2.844036  | 2.512366  | -0.107918 |
| H  | 2.235329  | -2.255132 | 2.369097  |
| H  | 2.436901  | -2.180566 | 0.654738  |
| H  | -0.109839 | -1.682985 | 2.283368  |
| H  | 0.289441  | -3.109730 | 1.323149  |
| H  | -1.006696 | 3.045666  | 2.262841  |
| H  | -0.923686 | 4.456628  | 1.208976  |
| H  | -2.570204 | 3.227052  | -0.358379 |
| H  | -3.139707 | 3.830172  | 1.167311  |
| H  | -2.829611 | 1.500575  | 2.155438  |
| H  | -4.175860 | 1.753142  | 1.039703  |
| H  | -2.935255 | -0.221843 | -1.640074 |
| H  | -4.367520 | 0.454074  | -0.840661 |
| H  | -3.115978 | 1.516005  | -1.527149 |
| H  | -2.489604 | -0.603277 | 2.010142  |
| H  | -3.764127 | -1.100034 | 0.886697  |
| H  | -2.178462 | -2.018059 | -0.670525 |
| H  | -1.916251 | -2.720303 | 0.907192  |

---

|   |           |           |           |
|---|-----------|-----------|-----------|
| H | 2.908672  | -0.822731 | -0.861588 |
| H | 2.816229  | 0.810169  | -1.497041 |
| H | 4.105750  | 0.370297  | -0.344158 |
| H | 1.081723  | 3.061101  | -1.360297 |
| H | -0.637889 | 3.438763  | -1.396293 |
| H | 0.489548  | 4.540540  | -0.573892 |
| H | 3.467012  | -0.306565 | 1.891940  |
| H | 1.903363  | 0.175132  | 2.531624  |
| S | -0.105518 | 0.601502  | -2.007330 |
| C | -0.317435 | -1.215038 | -2.268375 |
| H | 0.269286  | -1.504804 | -3.140952 |
| H | -1.360918 | -1.428440 | -2.499177 |
| H | 1.252887  | -1.940345 | -1.024404 |
| H | -0.108884 | -3.047310 | -1.132791 |
| H | 1.275233  | 1.459651  | 4.401881  |
| H | -0.497794 | 1.599095  | 4.786960  |
| H | 0.310332  | -0.032991 | 4.795058  |

$3\pi$ TS<sub>H</sub>-[Fe<sup>IV</sup>=O(TMC)(SR)]<sup>+</sup>

|    |           |           |           |
|----|-----------|-----------|-----------|
| Fe | -0.121331 | 0.637922  | 0.272932  |
| O  | -0.247355 | 0.434835  | 2.068105  |
| C  | 0.282028  | 1.521227  | 4.303351  |
| H  | 0.065234  | 1.005775  | 3.003613  |
| N  | -2.282868 | 0.589848  | 0.376690  |
| C  | -2.807789 | 1.664131  | 1.272852  |
| C  | -2.520743 | -0.730499 | 1.033791  |
| C  | -3.055895 | 0.646481  | -0.892944 |
| N  | 0.109066  | 2.730613  | 0.440412  |
| C  | 1.389903  | 2.867826  | 1.198486  |
| C  | -0.955010 | 3.413492  | 1.246995  |
| C  | 0.224208  | 3.445274  | -0.859504 |
| C  | -2.390573 | 3.074573  | 0.873313  |
| N  | 2.069693  | 0.603581  | 0.338225  |
| C  | 2.488021  | 2.021993  | 0.600605  |
| C  | 2.442506  | -0.288635 | 1.486614  |
| C  | 2.877787  | 0.179109  | -0.843169 |
| N  | -0.277790 | -1.464651 | 0.165661  |
| C  | -1.731464 | -1.819312 | 0.340274  |
| C  | 0.516856  | -2.089606 | 1.276469  |
| C  | 0.166210  | -2.032279 | -1.148338 |
| C  | 2.010976  | -1.750270 | 1.327284  |
| H  | 1.706851  | 3.916474  | 1.205832  |
| H  | 1.197139  | 2.575353  | 2.223017  |
| H  | 3.362423  | 2.037076  | 1.256920  |
| H  | 2.802321  | 2.448080  | -0.349715 |
| H  | 2.395556  | -2.271830 | 2.208927  |
| H  | 2.533920  | -2.205026 | 0.485497  |
| H  | 0.043741  | -1.783692 | 2.204291  |
| H  | 0.421177  | -3.177093 | 1.179334  |
| H  | -0.798453 | 3.147233  | 2.288583  |
| H  | -0.793516 | 4.492694  | 1.158001  |
| H  | -2.593705 | 3.276042  | -0.180001 |
| H  | -3.026367 | 3.767125  | 1.431330  |
| H  | -2.447569 | 1.453146  | 2.276396  |
| H  | -3.900383 | 1.588812  | 1.281256  |
| H  | -2.784785 | -0.171565 | -1.548630 |
| H  | -4.124144 | 0.580615  | -0.663380 |

---

|   |           |           |           |
|---|-----------|-----------|-----------|
| H | -2.854503 | 1.572804  | -1.419682 |
| H | -2.210999 | -0.636468 | 2.068797  |
| H | -3.587287 | -0.977535 | 1.003269  |
| H | -2.150779 | -2.012110 | -0.644188 |
| H | -1.814852 | -2.752098 | 0.902696  |
| H | 2.709429  | -0.861283 | -1.087617 |
| H | 2.606665  | 0.775926  | -1.706443 |
| H | 3.939175  | 0.313089  | -0.610952 |
| H | 0.992561  | 2.994333  | -1.479490 |
| H | -0.718743 | 3.390287  | -1.396574 |
| H | 0.475782  | 4.494917  | -0.680904 |
| H | 3.534410  | -0.266355 | 1.582251  |
| H | 2.015309  | 0.129787  | 2.390416  |
| S | -0.089387 | 0.574958  | -2.057043 |
| C | -0.349942 | -1.231679 | -2.329611 |
| H | 0.196362  | -1.529705 | -3.225195 |
| H | -1.404912 | -1.431722 | -2.523038 |
| H | 1.249630  | -2.044749 | -1.165776 |
| H | -0.167039 | -3.075105 | -1.209702 |
| H | 1.356006  | 1.647689  | 4.409231  |
| H | -0.284584 | 2.444558  | 4.371026  |
| H | -0.127819 | 0.704785  | 4.890726  |

$5\sigma$ TS<sub>H</sub><sup>-</sup>[Fe<sup>IV</sup>=O(TMC)(SR)]<sup>+</sup>

|    |           |           |           |
|----|-----------|-----------|-----------|
| Fe | -0.146106 | 0.677027  | 0.273380  |
| O  | -0.219206 | 0.639677  | 2.065167  |
| C  | -0.275292 | 0.598177  | 4.594134  |
| H  | -0.247621 | 0.610302  | 3.206184  |
| N  | -2.414908 | 0.575545  | 0.387310  |
| C  | -2.886881 | 1.699184  | 1.248727  |
| C  | -2.556452 | -0.734063 | 1.084629  |
| C  | -3.204646 | 0.572812  | -0.864156 |
| N  | 0.141710  | 2.861022  | 0.459915  |
| C  | 1.394944  | 2.924069  | 1.274052  |
| C  | -0.978976 | 3.466749  | 1.248607  |
| C  | 0.305174  | 3.594439  | -0.817052 |
| C  | -2.397276 | 3.086529  | 0.810916  |
| N  | 2.173328  | 0.656222  | 0.396952  |
| C  | 2.527250  | 2.080434  | 0.701132  |
| C  | 2.477872  | -0.254649 | 1.542885  |
| C  | 2.989039  | 0.255365  | -0.775883 |
| N  | -0.288887 | -1.523700 | 0.203493  |
| C  | -1.744888 | -1.840251 | 0.408434  |
| C  | 0.532171  | -2.079265 | 1.328361  |
| C  | 0.158460  | -2.078041 | -1.106079 |
| C  | 2.027293  | -1.714225 | 1.358528  |
| H  | 1.741076  | 3.962278  | 1.338789  |
| H  | 1.142142  | 2.586196  | 2.273296  |
| H  | 3.370867  | 2.115650  | 1.397818  |
| H  | 2.874031  | 2.528614  | -0.228264 |
| H  | 2.425240  | -2.251235 | 2.224996  |
| H  | 2.539179  | -2.156685 | 0.503463  |
| H  | 0.058448  | -1.750354 | 2.248982  |
| H  | 0.462619  | -3.173206 | 1.286216  |
| H  | -0.842042 | 3.166360  | 2.285122  |
| H  | -0.868838 | 4.555955  | 1.201205  |
| H  | -2.532912 | 3.233693  | -0.263192 |



|   |           |           |           |
|---|-----------|-----------|-----------|
| H | -3.061423 | 3.813395  | 1.285766  |
| H | -2.547500 | 1.504170  | 2.263039  |
| H | -3.983186 | 1.691158  | 1.254535  |
| H | -2.893772 | -0.236252 | -1.515925 |
| H | -4.268691 | 0.454288  | -0.629828 |
| H | -3.057795 | 1.503610  | -1.404575 |
| H | -2.226237 | -0.597481 | 2.109145  |
| H | -3.607688 | -1.045118 | 1.100543  |
| H | -2.174547 | -2.060846 | -0.566151 |
| H | -1.837361 | -2.753511 | 1.002239  |
| H | 2.810853  | -0.780765 | -1.040622 |
| H | 2.722315  | 0.866329  | -1.633113 |
| H | 4.054463  | 0.378202  | -0.548813 |
| H | 1.085992  | 3.139611  | -1.420932 |
| H | -0.622046 | 3.558466  | -1.384920 |
| H | 0.564631  | 4.640429  | -0.622608 |
| H | 3.565149  | -0.261003 | 1.694532  |
| H | 2.017241  | 0.167116  | 2.430633  |
| S | -0.105734 | 0.532464  | -2.131751 |
| C | -0.368333 | -1.294827 | -2.300245 |
| H | 0.156202  | -1.635045 | -3.193414 |
| H | -1.428984 | -1.486124 | -2.467611 |
| H | 1.243702  | -2.062523 | -1.123844 |
| H | -0.150904 | -3.128456 | -1.179334 |
| H | 0.622629  | 1.143017  | 4.869337  |
| H | -1.205144 | 1.105425  | 4.832304  |
| H | -0.258687 | -0.459028 | 4.840306  |

$5\pi\text{TS}_{\text{H}}-[\text{Fe}^{\text{IV}}=\text{O}(\text{TMC})(\text{SR})]^+$

|    |           |           |           |
|----|-----------|-----------|-----------|
| Fe | -0.122954 | 0.650037  | 0.261302  |
| O  | -0.156239 | 0.416251  | 2.057579  |
| C  | -0.100785 | 1.591996  | 4.303323  |
| H  | -0.119373 | 1.072328  | 2.989402  |
| N  | -2.413037 | 0.573798  | 0.413669  |
| C  | -2.834800 | 1.693197  | 1.300099  |
| C  | -2.539922 | -0.740347 | 1.096255  |
| C  | -3.240688 | 0.594892  | -0.811023 |
| N  | 0.198855  | 2.764046  | 0.433133  |
| C  | 1.483165  | 2.834958  | 1.200007  |
| C  | -0.885929 | 3.414927  | 1.243600  |
| C  | 0.334347  | 3.499194  | -0.849591 |
| C  | -2.327224 | 3.071532  | 0.856088  |
| N  | 2.245263  | 0.583153  | 0.293216  |
| C  | 2.603714  | 2.000843  | 0.590287  |
| C  | 2.562289  | -0.333347 | 1.427212  |
| C  | 3.027332  | 0.183120  | -0.899559 |
| N  | -0.271705 | -1.494701 | 0.168274  |
| C  | -1.725033 | -1.827040 | 0.394261  |
| C  | 0.571567  | -2.104017 | 1.252458  |
| C  | 0.141426  | -2.034006 | -1.165905 |
| C  | 2.076137  | -1.780776 | 1.244154  |
| H  | 1.819352  | 3.876695  | 1.250202  |
| H  | 1.276179  | 2.505161  | 2.210543  |
| H  | 3.466443  | 2.043475  | 1.264125  |
| H  | 2.921128  | 2.457028  | -0.345809 |
| H  | 2.480713  | -2.335484 | 2.096560  |
| H  | 2.555261  | -2.228582 | 0.372905  |

|   |           |           |           |
|---|-----------|-----------|-----------|
| H | 0.138912  | -1.783762 | 2.195410  |
| H | 0.466106  | -3.192820 | 1.175520  |
| H | -0.726927 | 3.143136  | 2.283173  |
| H | -0.744095 | 4.498221  | 1.168239  |
| H | -2.497399 | 3.229198  | -0.211166 |
| H | -2.952723 | 3.813530  | 1.359449  |
| H | -2.470485 | 1.477783  | 2.301916  |
| H | -3.930573 | 1.712412  | 1.344940  |
| H | -2.968762 | -0.218574 | -1.475675 |
| H | -4.300100 | 0.496219  | -0.546562 |
| H | -3.092495 | 1.524869  | -1.352829 |
| H | -2.195888 | -0.616935 | 2.117389  |
| H | -3.587452 | -1.064654 | 1.117095  |
| H | -2.167525 | -2.040795 | -0.576000 |
| H | -1.793159 | -2.748543 | 0.977298  |
| H | 2.846418  | -0.854526 | -1.157565 |
| H | 2.735318  | 0.792270  | -1.750568 |
| H | 4.100128  | 0.307801  | -0.707591 |
| H | 1.094380  | 3.040558  | -1.475142 |
| H | -0.608557 | 3.476466  | -1.390489 |
| H | 0.609552  | 4.540017  | -0.652498 |
| H | 3.653014  | -0.360634 | 1.557507  |
| H | 2.124396  | 0.085241  | 2.328242  |
| S | -0.148591 | 0.587504  | -2.039583 |
| C | -0.416807 | -1.221175 | -2.317231 |
| H | 0.096968  | -1.503486 | -3.236747 |
| H | -1.478940 | -1.410395 | -2.473807 |
| H | 1.224875  | -2.018777 | -1.212351 |
| H | -0.173150 | -3.082141 | -1.240949 |
| H | 0.779596  | 2.222016  | 4.385406  |
| H | -1.043185 | 2.118710  | 4.419324  |
| H | -0.037974 | 0.662133  | 4.860652  |

<sup>36</sup>TS<sub>H</sub>-[Fe<sup>IV</sup>=O(TMC)(OH)]<sup>+</sup>

|    |           |           |           |
|----|-----------|-----------|-----------|
| Fe | -0.258578 | 0.809600  | 0.183259  |
| O  | -0.346492 | 1.254095  | 1.910841  |
| C  | -1.395294 | 0.555116  | 4.085967  |
| H  | -0.897160 | 0.825844  | 2.904634  |
| N  | -2.519569 | 0.730384  | 0.032453  |
| C  | -3.105257 | 1.993102  | 0.556169  |
| C  | -2.791942 | -0.403242 | 0.944961  |
| C  | -3.045038 | 0.450886  | -1.317818 |
| N  | 0.040895  | 2.963952  | -0.024134 |
| C  | 1.227205  | 3.214242  | 0.844671  |
| C  | -1.140208 | 3.700681  | 0.520488  |
| C  | 0.310872  | 3.419694  | -1.406046 |
| C  | -2.506224 | 3.276271  | -0.031148 |
| N  | 2.094675  | 0.850431  | 0.427825  |
| C  | 2.414944  | 2.305696  | 0.523479  |
| C  | 2.326469  | 0.138322  | 1.715347  |
| C  | 2.948702  | 0.268600  | -0.628473 |
| N  | -0.426135 | -1.317710 | 0.522033  |
| C  | -1.894582 | -1.616097 | 0.680350  |
| C  | 0.345831  | -1.652114 | 1.764716  |
| C  | 0.072639  | -2.160261 | -0.596202 |
| C  | 1.848702  | -1.323364 | 1.756149  |
| H  | 1.554877  | 4.254971  | 0.735956  |

|   |           |           |           |
|---|-----------|-----------|-----------|
| H | 0.907808  | 3.064513  | 1.871475  |
| H | 3.188223  | 2.476625  | 1.280870  |
| H | 2.847581  | 2.607134  | -0.429025 |
| H | 2.225655  | -1.726829 | 2.700746  |
| H | 2.355011  | -1.908207 | 0.986714  |
| H | -0.133303 | -1.148857 | 2.596489  |
| H | 0.245930  | -2.731117 | 1.934439  |
| H | -1.136627 | 3.559809  | 1.599367  |
| H | -0.990441 | 4.768763  | 0.321829  |
| H | -2.499144 | 3.241378  | -1.122750 |
| H | -3.198982 | 4.083061  | 0.225351  |
| H | -2.959934 | 2.003644  | 1.635630  |
| H | -4.188067 | 1.986126  | 0.372213  |
| H | -2.584330 | -0.443339 | -1.727444 |
| H | -4.133713 | 0.315786  | -1.283507 |
| H | -2.809386 | 1.273358  | -1.988576 |
| H | -2.656334 | -0.047182 | 1.959697  |
| H | -3.833327 | -0.739601 | 0.855649  |
| H | -2.222245 | -2.105291 | -0.234372 |
| H | -2.036690 | -2.338129 | 1.488758  |
| H | 1.131414  | -1.995424 | -0.761912 |
| H | -0.082799 | -3.218046 | -0.359756 |
| H | -0.457625 | -1.905208 | -1.508006 |
| H | 2.750137  | -0.791618 | -0.757171 |
| H | 2.763550  | 0.769439  | -1.578509 |
| H | 4.012262  | 0.386443  | -0.384796 |
| H | 1.168811  | 2.899722  | -1.820121 |
| H | -0.541062 | 3.205107  | -2.044122 |
| H | 0.507195  | 4.497973  | -1.408892 |
| H | 3.404963  | 0.141380  | 1.928953  |
| H | 1.828286  | 0.705821  | 2.496685  |
| O | -0.125722 | 0.575689  | -1.623747 |
| H | 0.749979  | 0.306233  | -1.922635 |
| H | -0.522326 | 0.657923  | 4.725539  |
| H | -2.137802 | 1.335136  | 4.229453  |
| H | -1.810071 | -0.448376 | 4.071678  |

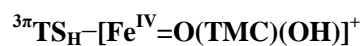

|    |           |           |           |
|----|-----------|-----------|-----------|
| Fe | -0.226284 | 0.780138  | 0.186737  |
| O  | -0.330263 | 1.192116  | 1.947834  |
| C  | -1.543020 | 0.579639  | 4.098235  |
| H  | -0.932326 | 0.832353  | 2.844814  |
| N  | -2.330363 | 0.713776  | 0.031423  |
| C  | -3.012891 | 1.926594  | 0.578620  |
| C  | -2.692044 | -0.445994 | 0.896140  |
| C  | -2.831745 | 0.478367  | -1.349223 |
| N  | 0.010007  | 2.899256  | -0.007311 |
| C  | 1.206489  | 3.178832  | 0.842994  |
| C  | -1.142302 | 3.659164  | 0.566314  |
| C  | 0.251379  | 3.388917  | -1.388463 |
| C  | -2.509560 | 3.255474  | 0.031556  |
| N  | 1.924525  | 0.802634  | 0.425894  |
| C  | 2.346637  | 2.245569  | 0.501007  |
| C  | 2.241601  | 0.110362  | 1.718330  |
| C  | 2.743925  | 0.191270  | -0.655456 |
| N  | -0.380774 | -1.333011 | 0.464726  |
| C  | -1.847554 | -1.653696 | 0.561928  |

|   |           |           |           |
|---|-----------|-----------|-----------|
| C | 0.316649  | -1.690154 | 1.742991  |
| C | 0.143852  | -2.198793 | -0.628847 |
| C | 1.810585  | -1.356410 | 1.798337  |
| H | 1.531006  | 4.215776  | 0.703548  |
| H | 0.900840  | 3.039590  | 1.874059  |
| H | 3.146963  | 2.359363  | 1.236439  |
| H | 2.770680  | 2.514698  | -0.464151 |
| H | 2.156458  | -1.714283 | 2.772316  |
| H | 2.359843  | -1.955187 | 1.070167  |
| H | -0.202284 | -1.187428 | 2.551563  |
| H | 0.204888  | -2.770321 | 1.892659  |
| H | -1.124477 | 3.499404  | 1.641714  |
| H | -0.968386 | 4.723551  | 0.375451  |
| H | -2.543555 | 3.282467  | -1.059546 |
| H | -3.217487 | 4.019350  | 0.364430  |
| H | -2.876775 | 1.920189  | 1.657827  |
| H | -4.084477 | 1.824339  | 0.375951  |
| H | -2.353950 | -0.389553 | -1.786856 |
| H | -3.916226 | 0.332642  | -1.317002 |
| H | -2.597119 | 1.329486  | -1.979892 |
| H | -2.545873 | -0.145310 | 1.926578  |
| H | -3.750399 | -0.696864 | 0.766144  |
| H | -2.156845 | -2.061302 | -0.397478 |
| H | -2.008453 | -2.438708 | 1.305347  |
| H | 1.223738  | -2.152942 | -0.683816 |
| H | -0.143439 | -3.236818 | -0.435010 |
| H | -0.259773 | -1.861806 | -1.577005 |
| H | 2.518407  | -0.859309 | -0.778326 |
| H | 2.552042  | 0.690127  | -1.600466 |
| H | 3.805983  | 0.296138  | -0.411761 |
| H | 1.156630  | 2.953234  | -1.802668 |
| H | -0.581652 | 3.127300  | -2.034007 |
| H | 0.373623  | 4.476338  | -1.378957 |
| H | 3.327815  | 0.153769  | 1.860362  |
| H | 1.763739  | 0.680045  | 2.508959  |
| O | -0.076787 | 0.486604  | -1.653605 |
| H | 0.561541  | 1.048227  | -2.101822 |
| H | -0.752181 | 0.912916  | 4.764400  |
| H | -2.423422 | 1.215909  | 4.105359  |
| H | -1.762725 | -0.481862 | 4.170025  |

${}^5\sigma\text{TS}_H\text{-}[\text{Fe}^{\text{IV}}=\text{O}(\text{TMC})(\text{OH})]^+$

|    |           |           |           |
|----|-----------|-----------|-----------|
| Fe | -0.136523 | 0.673295  | 0.257339  |
| O  | -0.213276 | 0.639882  | 2.055530  |
| C  | -0.236064 | 0.581730  | 4.583002  |
| H  | -0.219502 | 0.608976  | 3.195138  |
| N  | -2.362874 | 0.535891  | 0.344650  |
| C  | -2.905816 | 1.666136  | 1.154691  |
| C  | -2.541330 | -0.752056 | 1.071578  |
| C  | -3.034852 | 0.494620  | -0.971327 |
| N  | 0.131310  | 2.872527  | 0.473305  |
| C  | 1.387351  | 2.920219  | 1.276110  |
| C  | -1.003742 | 3.445012  | 1.256287  |
| C  | 0.291488  | 3.616098  | -0.795686 |
| C  | -2.404008 | 3.061584  | 0.759388  |
| N  | 2.132870  | 0.644649  | 0.374064  |
| C  | 2.503627  | 2.067893  | 0.676139  |

|   |           |           |           |
|---|-----------|-----------|-----------|
| C | 2.497643  | -0.268656 | 1.498718  |
| C | 2.855333  | 0.251956  | -0.859010 |
| N | -0.278046 | -1.604505 | 0.237648  |
| C | -1.736394 | -1.893291 | 0.452968  |
| C | 0.545617  | -2.083552 | 1.391969  |
| C | 0.135942  | -2.306595 | -1.000068 |
| C | 2.042043  | -1.730175 | 1.348723  |
| H | 1.749723  | 3.953172  | 1.345763  |
| H | 1.144459  | 2.574914  | 2.275468  |
| H | 3.360806  | 2.090243  | 1.355891  |
| H | 2.835538  | 2.517611  | -0.257756 |
| H | 2.484145  | -2.256651 | 2.200083  |
| H | 2.509170  | -2.181311 | 0.472338  |
| H | 0.098462  | -1.678357 | 2.294629  |
| H | 0.464091  | -3.177450 | 1.432468  |
| H | -0.890659 | 3.109653  | 2.285209  |
| H | -0.907925 | 4.537255  | 1.248394  |
| H | -2.498622 | 3.224647  | -0.316827 |
| H | -3.095025 | 3.773423  | 1.218613  |
| H | -2.641122 | 1.477632  | 2.192930  |
| H | -3.999743 | 1.645996  | 1.078952  |
| H | -2.609712 | -0.287603 | -1.592643 |
| H | -4.108246 | 0.314741  | -0.840498 |
| H | -2.888250 | 1.436988  | -1.492070 |
| H | -2.233961 | -0.587274 | 2.098947  |
| H | -3.598551 | -1.044074 | 1.069078  |
| H | -2.160092 | -2.147851 | -0.516858 |
| H | -1.848439 | -2.780150 | 1.083975  |
| H | 1.183656  | -2.128057 | -1.219440 |
| H | -0.014245 | -3.387262 | -0.897018 |
| H | -0.457987 | -1.953969 | -1.840846 |
| H | 2.660209  | -0.785206 | -1.110765 |
| H | 2.519552  | 0.871731  | -1.686353 |
| H | 3.936029  | 0.374383  | -0.723744 |
| H | 1.062479  | 3.159361  | -1.407363 |
| H | -0.634254 | 3.582327  | -1.364164 |
| H | 0.550831  | 4.660482  | -0.588088 |
| H | 3.591187  | -0.269519 | 1.597224  |
| H | 2.078539  | 0.155432  | 2.406526  |
| O | -0.108468 | 0.830727  | -1.644634 |
| H | 0.178320  | 0.081946  | -2.175735 |
| H | -0.789385 | 1.478294  | 4.845841  |
| H | -0.746139 | -0.348014 | 4.816277  |
| H | 0.813989  | 0.602212  | 4.858327  |

${}^5\pi\text{TS}_\text{H}-[\text{Fe}^{\text{IV}}=\text{O}(\text{TMC})(\text{OH})]^+$

|    |           |           |           |
|----|-----------|-----------|-----------|
| Fe | -0.252551 | 0.791981  | 0.166212  |
| O  | -0.433129 | 1.251617  | 1.893914  |
| C  | -1.359883 | 0.444149  | 4.120143  |
| H  | -0.884119 | 0.767616  | 2.813772  |
| N  | -2.461076 | 0.697370  | -0.009387 |
| C  | -3.078775 | 1.950876  | 0.513645  |
| C  | -2.754739 | -0.443581 | 0.896167  |
| C  | -2.968672 | 0.419978  | -1.371308 |
| N  | 0.039856  | 2.983135  | -0.043595 |
| C  | 1.207412  | 3.213636  | 0.856161  |
| C  | -1.158451 | 3.700706  | 0.494055  |

---

|                                                                            |           |           |           |
|----------------------------------------------------------------------------|-----------|-----------|-----------|
| C                                                                          | 0.335563  | 3.483934  | -1.404403 |
| C                                                                          | -2.509949 | 3.248946  | -0.068934 |
| N                                                                          | 2.008932  | 0.822084  | 0.467949  |
| C                                                                          | 2.373208  | 2.272484  | 0.561334  |
| C                                                                          | 2.250265  | 0.113272  | 1.760393  |
| C                                                                          | 2.840405  | 0.223025  | -0.602040 |
| N                                                                          | -0.408752 | -1.389153 | 0.489563  |
| C                                                                          | -1.881499 | -1.665140 | 0.609846  |
| C                                                                          | 0.315112  | -1.715721 | 1.758400  |
| C                                                                          | 0.104719  | -2.244901 | -0.610020 |
| C                                                                          | 1.809497  | -1.358605 | 1.802181  |
| H                                                                          | 1.563933  | 4.244668  | 0.749614  |
| H                                                                          | 0.857759  | 3.069786  | 1.872468  |
| H                                                                          | 3.135954  | 2.416568  | 1.332592  |
| H                                                                          | 2.834415  | 2.552475  | -0.384128 |
| H                                                                          | 2.164606  | -1.740351 | 2.763865  |
| H                                                                          | 2.356181  | -1.937906 | 1.056740  |
| H                                                                          | -0.202709 | -1.216709 | 2.570324  |
| H                                                                          | 0.226611  | -2.795968 | 1.929382  |
| H                                                                          | -1.161179 | 3.556282  | 1.571588  |
| H                                                                          | -1.025567 | 4.770463  | 0.295248  |
| H                                                                          | -2.498053 | 3.220681  | -1.161005 |
| H                                                                          | -3.223754 | 4.036362  | 0.188510  |
| H                                                                          | -2.938644 | 1.960801  | 1.592883  |
| H                                                                          | -4.157083 | 1.909891  | 0.317441  |
| H                                                                          | -2.481882 | -0.455661 | -1.788011 |
| H                                                                          | -4.052610 | 0.259616  | -1.339009 |
| H                                                                          | -2.749585 | 1.256668  | -2.028918 |
| H                                                                          | -2.608765 | -0.099136 | 1.913583  |
| H                                                                          | -3.802993 | -0.749676 | 0.796773  |
| H                                                                          | -2.200609 | -2.117606 | -0.326407 |
| H                                                                          | -2.055594 | -2.409383 | 1.392151  |
| H                                                                          | 1.178939  | -2.141767 | -0.711257 |
| H                                                                          | -0.126044 | -3.295345 | -0.401896 |
| H                                                                          | -0.348989 | -1.940235 | -1.547539 |
| H                                                                          | 2.623949  | -0.832340 | -0.720961 |
| H                                                                          | 2.630611  | 0.712431  | -1.549157 |
| H                                                                          | 3.904785  | 0.336398  | -0.364948 |
| H                                                                          | 1.227493  | 3.008389  | -1.807940 |
| H                                                                          | -0.499210 | 3.283288  | -2.072848 |
| H                                                                          | 0.511439  | 4.564649  | -1.380270 |
| H                                                                          | 3.327016  | 0.144740  | 1.972676  |
| H                                                                          | 1.735558  | 0.675059  | 2.535236  |
| O                                                                          | -0.056276 | 0.469329  | -1.650905 |
| H                                                                          | 0.317372  | 1.208015  | -2.142004 |
| H                                                                          | -0.437661 | 0.442320  | 4.694244  |
| H                                                                          | -2.012585 | 1.287435  | 4.324882  |
| H                                                                          | -1.865769 | -0.515770 | 4.082465  |
| <b><sup>36</sup>TS<sub>H</sub>-[Fe<sup>IV</sup>=O(TMC)(F)]<sup>+</sup></b> |           |           |           |
| Fe                                                                         | -0.140448 | 0.647361  | 0.358741  |
| O                                                                          | -0.246978 | 0.654706  | 2.172248  |
| C                                                                          | -0.298323 | 0.720365  | 4.742642  |
| H                                                                          | -0.268066 | 0.679492  | 3.258555  |
| N                                                                          | -2.270970 | 0.589918  | 0.332254  |
| C                                                                          | -2.904693 | 1.700024  | 1.102150  |
| C                                                                          | -2.549002 | -0.691731 | 1.047628  |

|                                                                                                       |           |           |           |
|-------------------------------------------------------------------------------------------------------|-----------|-----------|-----------|
| C                                                                                                     | -2.839421 | 0.556075  | -1.039015 |
| N                                                                                                     | 0.068324  | 2.771482  | 0.453942  |
| C                                                                                                     | 1.324888  | 2.914981  | 1.248639  |
| C                                                                                                     | -1.035083 | 3.442271  | 1.200815  |
| C                                                                                                     | 0.219126  | 3.408785  | -0.878799 |
| C                                                                                                     | -2.442412 | 3.102539  | 0.723846  |
| N                                                                                                     | 2.016205  | 0.641871  | 0.408557  |
| C                                                                                                     | 2.435254  | 2.065347  | 0.671769  |
| C                                                                                                     | 2.436276  | -0.244698 | 1.540632  |
| C                                                                                                     | 2.705047  | 0.228656  | -0.843913 |
| N                                                                                                     | -0.286642 | -1.507616 | 0.291447  |
| C                                                                                                     | -1.749142 | -1.831618 | 0.456510  |
| C                                                                                                     | 0.504664  | -2.045564 | 1.443629  |
| C                                                                                                     | 0.145187  | -2.165145 | -0.971669 |
| C                                                                                                     | 2.000305  | -1.709777 | 1.431704  |
| H                                                                                                     | 1.640282  | 3.964356  | 1.260451  |
| H                                                                                                     | 1.095679  | 2.607643  | 2.263312  |
| H                                                                                                     | 3.295027  | 2.075865  | 1.345704  |
| H                                                                                                     | 2.771009  | 2.486160  | -0.273328 |
| H                                                                                                     | 2.420542  | -2.206782 | 2.310968  |
| H                                                                                                     | 2.488692  | -2.186763 | 0.581340  |
| H                                                                                                     | 0.045017  | -1.662804 | 2.349721  |
| H                                                                                                     | 0.403137  | -3.137109 | 1.435583  |
| H                                                                                                     | -0.937064 | 3.152340  | 2.244918  |
| H                                                                                                     | -0.874609 | 4.523800  | 1.131930  |
| H                                                                                                     | -2.565984 | 3.295829  | -0.343417 |
| H                                                                                                     | -3.118880 | 3.799368  | 1.225472  |
| H                                                                                                     | -2.682230 | 1.527109  | 2.152844  |
| H                                                                                                     | -3.989053 | 1.621664  | 0.966173  |
| H                                                                                                     | -2.370485 | -0.223071 | -1.628317 |
| H                                                                                                     | -3.918639 | 0.381083  | -0.981632 |
| H                                                                                                     | -2.652268 | 1.500650  | -1.539917 |
| H                                                                                                     | -2.283726 | -0.537699 | 2.088245  |
| H                                                                                                     | -3.616946 | -0.928259 | 0.985231  |
| H                                                                                                     | -2.138489 | -2.086929 | -0.526577 |
| H                                                                                                     | -1.859682 | -2.721676 | 1.080661  |
| H                                                                                                     | 1.218448  | -2.106007 | -1.098688 |
| H                                                                                                     | -0.138067 | -3.221930 | -0.946458 |
| H                                                                                                     | -0.327441 | -1.670166 | -1.813952 |
| H                                                                                                     | 2.558112  | -0.824436 | -1.044096 |
| H                                                                                                     | 2.302068  | 0.794211  | -1.678062 |
| H                                                                                                     | 3.779150  | 0.413850  | -0.745400 |
| H                                                                                                     | 0.991585  | 2.912824  | -1.454621 |
| H                                                                                                     | -0.707979 | 3.323476  | -1.437106 |
| H                                                                                                     | 0.471199  | 4.466225  | -0.750212 |
| H                                                                                                     | 3.531224  | -0.220895 | 1.591384  |
| H                                                                                                     | 2.040056  | 0.194521  | 2.450983  |
| F                                                                                                     | -0.080677 | 0.687691  | -1.573151 |
| H                                                                                                     | 0.598926  | 1.281722  | 4.982195  |
| H                                                                                                     | -1.233504 | 1.232210  | 4.944058  |
| H                                                                                                     | -0.275308 | -0.329069 | 5.016822  |
| ${}^3\pi\text{TS}_{\text{H}}\text{-}[\text{Fe}^{\text{IV}}=\text{O}(\text{TMC})(\text{F})]^{\dagger}$ |           |           |           |
| Fe                                                                                                    | -0.085225 | 0.657632  | 0.373969  |
| O                                                                                                     | -0.246755 | 0.541108  | 2.147676  |
| C                                                                                                     | 0.753608  | 1.462629  | 4.302165  |
| H                                                                                                     | 0.283510  | 1.019698  | 3.027102  |

|   |           |           |           |
|---|-----------|-----------|-----------|
| N | -2.199835 | 0.594222  | 0.392180  |
| C | -2.826378 | 1.703083  | 1.172463  |
| C | -2.487468 | -0.681137 | 1.111925  |
| C | -2.801629 | 0.560656  | -0.965387 |
| N | 0.118411  | 2.738639  | 0.428787  |
| C | 1.403493  | 2.939680  | 1.157580  |
| C | -0.957254 | 3.435957  | 1.200452  |
| C | 0.208392  | 3.351518  | -0.923690 |
| C | -2.380728 | 3.103599  | 0.774439  |
| N | 2.034326  | 0.648440  | 0.338408  |
| C | 2.494897  | 2.061774  | 0.588020  |
| C | 2.522303  | -0.257404 | 1.430700  |
| C | 2.662106  | 0.241230  | -0.951634 |
| N | -0.246223 | -1.484301 | 0.296267  |
| C | -1.698293 | -1.823619 | 0.515017  |
| C | 0.589627  | -2.051814 | 1.403251  |
| C | 0.127755  | -2.135629 | -0.990643 |
| C | 2.083262  | -1.720851 | 1.327722  |
| H | 1.710529  | 3.989129  | 1.094406  |
| H | 1.226128  | 2.709956  | 2.201486  |
| H | 3.357193  | 2.059062  | 1.258021  |
| H | 2.836609  | 2.469188  | -0.360493 |
| H | 2.543597  | -2.225716 | 2.182212  |
| H | 2.533036  | -2.187442 | 0.450995  |
| H | 0.174384  | -1.682232 | 2.336183  |
| H | 0.481079  | -3.142255 | 1.380426  |
| H | -0.832942 | 3.166677  | 2.247246  |
| H | -0.784389 | 4.513383  | 1.109615  |
| H | -2.541418 | 3.295841  | -0.287821 |
| H | -3.035455 | 3.803994  | 1.299567  |
| H | -2.576286 | 1.537706  | 2.218338  |
| H | -3.913009 | 1.615187  | 1.065259  |
| H | -2.361463 | -0.231640 | -1.559154 |
| H | -3.881735 | 0.404234  | -0.880931 |
| H | -2.612168 | 1.496996  | -1.480461 |
| H | -2.213316 | -0.528866 | 2.150465  |
| H | -3.557530 | -0.909058 | 1.056166  |
| H | -2.119169 | -2.099138 | -0.449479 |
| H | -1.778202 | -2.704125 | 1.156547  |
| H | 1.194731  | -2.088641 | -1.163184 |
| H | -0.164326 | -3.189609 | -0.961577 |
| H | -0.374342 | -1.631057 | -1.809535 |
| H | 2.482881  | -0.803429 | -1.164446 |
| H | 2.240999  | 0.829958  | -1.759634 |
| H | 3.742719  | 0.401106  | -0.892163 |
| H | 0.990753  | 2.878414  | -1.505336 |
| H | -0.725070 | 3.213547  | -1.459018 |
| H | 0.417715  | 4.420555  | -0.820917 |
| H | 3.617963  | -0.230833 | 1.418935  |
| H | 2.190854  | 0.162307  | 2.374591  |
| F | -0.100733 | 0.676292  | -1.492370 |
| H | 1.826217  | 1.617271  | 4.232553  |
| H | 0.182898  | 2.365888  | 4.497564  |
| H | 0.463262  | 0.611014  | 4.910416  |

<sup>56</sup>TS<sub>H</sub>-[Fe<sup>IV</sup>=O(TMC)(F)]<sup>+</sup>

|    |           |          |          |
|----|-----------|----------|----------|
| Fe | -0.137976 | 0.650427 | 0.343112 |
|----|-----------|----------|----------|



---

|   |           |           |           |
|---|-----------|-----------|-----------|
| O | -0.215251 | 0.619409  | 2.123295  |
| C | -0.245410 | 0.624027  | 4.645758  |
| H | -0.231238 | 0.619932  | 3.272320  |
| N | -2.349777 | 0.539701  | 0.353690  |
| C | -2.916448 | 1.671680  | 1.145527  |
| C | -2.557083 | -0.747790 | 1.075532  |
| C | -2.971385 | 0.499446  | -0.988121 |
| N | 0.123830  | 2.846135  | 0.491817  |
| C | 1.377866  | 2.920667  | 1.294490  |
| C | -1.011310 | 3.445119  | 1.254579  |
| C | 0.285011  | 3.539960  | -0.805403 |
| C | -2.411798 | 3.066936  | 0.756761  |
| N | 2.110648  | 0.646080  | 0.387140  |
| C | 2.498079  | 2.062495  | 0.710036  |
| C | 2.506984  | -0.291387 | 1.484062  |
| C | 2.787586  | 0.276857  | -0.880258 |
| N | -0.284879 | -1.590641 | 0.255820  |
| C | -1.741701 | -1.892423 | 0.475969  |
| C | 0.558113  | -2.112197 | 1.376769  |
| C | 0.110440  | -2.223824 | -1.026604 |
| C | 2.052734  | -1.751825 | 1.319113  |
| H | 1.732330  | 3.957099  | 1.345965  |
| H | 1.135937  | 2.593008  | 2.300357  |
| H | 3.339836  | 2.065576  | 1.407762  |
| H | 2.856261  | 2.516629  | -0.211699 |
| H | 2.508502  | -2.288272 | 2.156829  |
| H | 2.509460  | -2.187757 | 0.430065  |
| H | 0.125222  | -1.741626 | 2.301875  |
| H | 0.480305  | -3.206689 | 1.379681  |
| H | -0.907484 | 3.129563  | 2.291158  |
| H | -0.903999 | 4.535770  | 1.225978  |
| H | -2.508953 | 3.237581  | -0.317817 |
| H | -3.100262 | 3.777236  | 1.222001  |
| H | -2.675709 | 1.487705  | 2.190779  |
| H | -4.007884 | 1.645762  | 1.044510  |
| H | -2.520393 | -0.280467 | -1.593749 |
| H | -4.048063 | 0.316478  | -0.898323 |
| H | -2.809593 | 1.444195  | -1.500129 |
| H | -2.275421 | -0.584869 | 2.110927  |
| H | -3.615750 | -1.031249 | 1.045724  |
| H | -2.162354 | -2.166900 | -0.489509 |
| H | -1.843857 | -2.768836 | 1.121748  |
| H | 1.171610  | -2.099152 | -1.210707 |
| H | -0.112245 | -3.296272 | -1.003789 |
| H | -0.429554 | -1.753176 | -1.843515 |
| H | 2.592653  | -0.758019 | -1.136985 |
| H | 2.409308  | 0.899688  | -1.686413 |
| H | 3.870579  | 0.411789  | -0.784436 |
| H | 1.067026  | 3.070271  | -1.393697 |
| H | -0.636412 | 3.475581  | -1.378069 |
| H | 0.534574  | 4.593806  | -0.639269 |
| H | 3.602207  | -0.290214 | 1.553030  |
| H | 2.111824  | 0.114945  | 2.411116  |
| F | -0.117909 | 0.739972  | -1.554175 |
| H | 0.668267  | 1.149265  | 4.907000  |
| H | -1.160022 | 1.157571  | 4.885701  |
| H | -0.253346 | -0.429644 | 4.906759  |

$5\pi$ TS<sub>H</sub>-[Fe<sup>IV</sup>=O(TMC)(F)]<sup>+</sup>

|    |           |           |           |
|----|-----------|-----------|-----------|
| Fe | -0.102874 | 0.691440  | 0.363138  |
| O  | -0.304958 | 0.653037  | 2.123398  |
| C  | 0.871080  | 1.271237  | 4.289354  |
| H  | 0.344690  | 0.971648  | 2.990754  |
| N  | -2.275513 | 0.580496  | 0.373990  |
| C  | -2.861537 | 1.732204  | 1.126270  |
| C  | -2.516311 | -0.682184 | 1.128279  |
| C  | -2.880387 | 0.505724  | -0.975292 |
| N  | 0.135668  | 2.892274  | 0.400551  |
| C  | 1.400240  | 3.015600  | 1.168834  |
| C  | -0.988168 | 3.530760  | 1.145571  |
| C  | 0.273837  | 3.508123  | -0.937235 |
| C  | -2.389817 | 3.121008  | 0.683685  |
| N  | 2.078220  | 0.677810  | 0.364064  |
| C  | 2.504683  | 2.095010  | 0.646332  |
| C  | 2.540380  | -0.258166 | 1.440103  |
| C  | 2.688580  | 0.286252  | -0.934473 |
| N  | -0.269160 | -1.582685 | 0.313872  |
| C  | -1.721040 | -1.860161 | 0.568001  |
| C  | 0.591301  | -2.073031 | 1.431363  |
| C  | 0.091159  | -2.258914 | -0.955083 |
| C  | 2.083563  | -1.720392 | 1.317698  |
| H  | 1.774060  | 4.045815  | 1.130185  |
| H  | 1.174051  | 2.790565  | 2.205351  |
| H  | 3.327745  | 2.095446  | 1.364580  |
| H  | 2.900828  | 2.503785  | -0.280457 |
| H  | 2.569914  | -2.238239 | 2.149860  |
| H  | 2.511276  | -2.172009 | 0.422398  |
| H  | 0.184311  | -1.665168 | 2.353371  |
| H  | 0.508939  | -3.166633 | 1.478790  |
| H  | -0.874851 | 3.269003  | 2.196330  |
| H  | -0.883538 | 4.619096  | 1.061692  |
| H  | -2.507743 | 3.257810  | -0.393400 |
| H  | -3.081298 | 3.834479  | 1.139654  |
| H  | -2.611414 | 1.590728  | 2.175481  |
| H  | -3.951897 | 1.675799  | 1.028629  |
| H  | -2.435812 | -0.301007 | -1.548225 |
| H  | -3.959946 | 0.341709  | -0.887764 |
| H  | -2.700162 | 1.429383  | -1.517644 |
| H  | -2.239991 | -0.494362 | 2.160371  |
| H  | -3.581058 | -0.940165 | 1.093156  |
| H  | -2.160695 | -2.174061 | -0.376819 |
| H  | -1.823870 | -2.705182 | 1.254757  |
| H  | 1.152835  | -2.173999 | -1.157111 |
| H  | -0.162131 | -3.324022 | -0.903926 |
| H  | -0.445375 | -1.794049 | -1.777971 |
| H  | 2.445932  | -0.739670 | -1.182574 |
| H  | 2.302194  | 0.922204  | -1.724706 |
| H  | 3.777525  | 0.384573  | -0.875532 |
| H  | 1.064567  | 3.021328  | -1.499837 |
| H  | -0.647781 | 3.389866  | -1.500459 |
| H  | 0.502368  | 4.575186  | -0.836854 |
| H  | 3.637192  | -0.251984 | 1.441383  |
| H  | 2.213959  | 0.148939  | 2.391373  |
| F  | -0.118671 | 0.686999  | -1.487158 |

---

|   |          |          |          |
|---|----------|----------|----------|
| H | 1.864032 | 1.690745 | 4.163579 |
| H | 0.126860 | 1.967910 | 4.662685 |
| H | 0.847909 | 0.290865 | 4.754878 |

$^{36}\text{TS}_{\text{H}}\text{-}[\text{Fe}^{\text{IV}}=\text{O}(\text{TMC})(\text{CF}_3\text{CO}_2)]^+$

|    |           |           |           |
|----|-----------|-----------|-----------|
| Fe | -0.157595 | 0.673238  | 0.340495  |
| O  | -0.225740 | 0.646907  | 2.134804  |
| C  | -0.272202 | 0.633517  | 4.674544  |
| H  | -0.245689 | 0.642376  | 3.247696  |
| N  | -2.295222 | 0.589222  | 0.374431  |
| C  | -2.899715 | 1.692568  | 1.181160  |
| C  | -2.534249 | -0.702137 | 1.091061  |
| C  | -2.953968 | 0.555114  | -0.957280 |
| N  | 0.066185  | 2.795843  | 0.490356  |
| C  | 1.332155  | 2.911158  | 1.279442  |
| C  | -1.034206 | 3.434558  | 1.273802  |
| C  | 0.213076  | 3.514497  | -0.802844 |
| C  | -2.443729 | 3.096867  | 0.803129  |
| N  | 2.008289  | 0.672328  | 0.351241  |
| C  | 2.432507  | 2.088597  | 0.650928  |
| C  | 2.439262  | -0.232053 | 1.469987  |
| C  | 2.719668  | 0.279502  | -0.896656 |
| N  | -0.296673 | -1.487344 | 0.244072  |
| C  | -1.752352 | -1.825480 | 0.450416  |
| C  | 0.519149  | -2.028967 | 1.382329  |
| C  | 0.113886  | -2.170119 | -1.014131 |
| C  | 2.011730  | -1.695075 | 1.341519  |
| H  | 1.642707  | 3.960248  | 1.324994  |
| H  | 1.119283  | 2.568311  | 2.285827  |
| H  | 3.306035  | 2.076672  | 1.306187  |
| H  | 2.748829  | 2.540371  | -0.286362 |
| H  | 2.452221  | -2.206824 | 2.202031  |
| H  | 2.481600  | -2.153795 | 0.471280  |
| H  | 0.076886  | -1.656656 | 2.300626  |
| H  | 0.414178  | -3.119174 | 1.365650  |
| H  | -0.919766 | 3.118266  | 2.308210  |
| H  | -0.880795 | 4.517651  | 1.232904  |
| H  | -2.571734 | 3.291176  | -0.263578 |
| H  | -3.118032 | 3.791646  | 1.309862  |
| H  | -2.647734 | 1.505997  | 2.222496  |
| H  | -3.986983 | 1.617406  | 1.077222  |
| H  | -2.546430 | -0.245424 | -1.565402 |
| H  | -4.026985 | 0.389804  | -0.823989 |
| H  | -2.789811 | 1.490320  | -1.481303 |
| H  | -2.232405 | -0.560377 | 2.122862  |
| H  | -3.601898 | -0.943628 | 1.067284  |
| H  | -2.172234 | -2.065179 | -0.523872 |
| H  | -1.834437 | -2.728093 | 1.059812  |
| H  | 1.169449  | -2.034000 | -1.210441 |
| H  | -0.086374 | -3.241648 | -0.921338 |
| H  | -0.444309 | -1.765753 | -1.849754 |
| H  | 2.521812  | -0.752380 | -1.155207 |
| H  | 2.392363  | 0.906880  | -1.717554 |
| H  | 3.796681  | 0.400560  | -0.747843 |
| H  | 1.012375  | 3.079668  | -1.393269 |
| H  | -0.702912 | 3.442891  | -1.378929 |
| H  | 0.446020  | 4.564917  | -0.605985 |

---

|   |           |           |           |
|---|-----------|-----------|-----------|
| O | -0.092563 | 0.702562  | -1.843065 |
| C | -0.461840 | 1.151816  | -2.965611 |
| O | -1.249889 | 2.049575  | -3.245747 |
| C | 0.216446  | 0.407499  | -4.170606 |
| F | -0.155968 | 0.902220  | -5.362701 |
| F | 1.566689  | 0.491074  | -4.108532 |
| F | -0.099657 | -0.910453 | -4.171994 |
| H | 3.533620  | -0.199932 | 1.508639  |
| H | 2.052796  | 0.191770  | 2.391199  |
| H | 0.780033  | 0.638963  | 4.939020  |
| H | -0.811944 | 1.546002  | 4.905729  |
| H | -0.800945 | -0.287099 | 4.898554  |

$3\pi$ TS<sub>H</sub><sup>-</sup>[Fe<sup>IV</sup>=O(TMC)(CF<sub>3</sub>CO<sub>2</sub>)<sup>+</sup>

|    |           |           |           |
|----|-----------|-----------|-----------|
| Fe | -0.063219 | 0.719480  | 0.257308  |
| O  | -0.157053 | 0.591674  | 2.017063  |
| C  | 0.795135  | 1.447946  | 4.202650  |
| H  | 0.380871  | 1.056156  | 2.912026  |
| N  | -2.188691 | 0.623859  | 0.412014  |
| C  | -2.758791 | 1.740508  | 1.227943  |
| C  | -2.415318 | -0.650632 | 1.160548  |
| C  | -2.923683 | 0.566139  | -0.879090 |
| N  | 0.172341  | 2.806311  | 0.383051  |
| C  | 1.471844  | 2.968359  | 1.101201  |
| C  | -0.892353 | 3.475286  | 1.198241  |
| C  | 0.260621  | 3.508100  | -0.927138 |
| C  | -2.322239 | 3.135358  | 0.800212  |
| N  | 2.076732  | 0.705948  | 0.203030  |
| C  | 2.543908  | 2.114082  | 0.468074  |
| C  | 2.572367  | -0.202744 | 1.293286  |
| C  | 2.724875  | 0.298622  | -1.076846 |
| N  | -0.221567 | -1.447477 | 0.224188  |
| C  | -1.661654 | -1.787415 | 0.511805  |
| C  | 0.649789  | -1.990642 | 1.319839  |
| C  | 0.115435  | -2.155887 | -1.042645 |
| C  | 2.137832  | -1.664533 | 1.191619  |
| H  | 1.779968  | 4.018293  | 1.075233  |
| H  | 1.317691  | 2.698946  | 2.138256  |
| H  | 3.431504  | 2.096926  | 1.103613  |
| H  | 2.847980  | 2.545661  | -0.482472 |
| H  | 2.628043  | -2.175210 | 2.025614  |
| H  | 2.555841  | -2.123229 | 0.295416  |
| H  | 0.263342  | -1.608786 | 2.259414  |
| H  | 0.537029  | -3.080103 | 1.317788  |
| H  | -0.738989 | 3.190824  | 2.236604  |
| H  | -0.731191 | 4.554981  | 1.123261  |
| H  | -2.498543 | 3.308603  | -0.263130 |
| H  | -2.969151 | 3.843795  | 1.323688  |
| H  | -2.455752 | 1.574037  | 2.259219  |
| H  | -3.849494 | 1.661152  | 1.180521  |
| H  | -2.549257 | -0.243884 | -1.496402 |
| H  | -3.986071 | 0.396940  | -0.682214 |
| H  | -2.797569 | 1.493312  | -1.426392 |
| H  | -2.079448 | -0.494525 | 2.179319  |
| H  | -3.484861 | -0.884128 | 1.174186  |
| H  | -2.130572 | -2.053497 | -0.432817 |
| H  | -1.709531 | -2.674272 | 1.147317  |

---

|   |           |           |           |
|---|-----------|-----------|-----------|
| H | 1.152408  | -2.010948 | -1.315170 |
| H | -0.061702 | -3.227475 | -0.912211 |
| H | -0.506869 | -1.785841 | -1.848545 |
| H | 2.468039  | -0.716920 | -1.345117 |
| H | 2.402257  | 0.954409  | -1.875949 |
| H | 3.810640  | 0.368159  | -0.964571 |
| H | 1.034681  | 3.065524  | -1.545323 |
| H | -0.679843 | 3.431399  | -1.459751 |
| H | 0.503457  | 4.559828  | -0.753049 |
| O | -0.087825 | 0.669824  | -1.783415 |
| C | -0.508654 | 1.099923  | -2.899438 |
| O | -1.301556 | 1.994039  | -3.165046 |
| C | 0.081358  | 0.304559  | -4.117833 |
| F | -0.124901 | 0.938361  | -5.283536 |
| F | 1.409324  | 0.092923  | -4.007835 |
| F | -0.509181 | -0.913378 | -4.215335 |
| H | 3.666871  | -0.170683 | 1.267786  |
| H | 2.253999  | 0.214103  | 2.242359  |
| H | 1.868815  | 1.604131  | 4.162218  |
| H | 0.214065  | 2.343542  | 4.399868  |
| H | 0.486059  | 0.575262  | 4.769571  |

$5\sigma_{\text{TS}_H}[\text{Fe}^{\text{IV}}=\text{O}(\text{TMC})(\text{CF}_3\text{CO}_2)]^+$

|    |           |           |           |
|----|-----------|-----------|-----------|
| Fe | -0.155459 | 0.674535  | 0.292432  |
| O  | -0.211360 | 0.636760  | 2.056115  |
| C  | -0.259195 | 0.627513  | 4.572756  |
| H  | -0.237504 | 0.632960  | 3.221995  |
| N  | -2.371745 | 0.528239  | 0.360282  |
| C  | -2.905677 | 1.666869  | 1.171860  |
| C  | -2.540084 | -0.758813 | 1.098617  |
| C  | -3.091133 | 0.468931  | -0.933672 |
| N  | 0.137641  | 2.870032  | 0.482472  |
| C  | 1.394475  | 2.911676  | 1.287986  |
| C  | -1.001538 | 3.440802  | 1.267272  |
| C  | 0.310451  | 3.646937  | -0.768328 |
| C  | -2.399433 | 3.056871  | 0.765485  |
| N  | 2.106026  | 0.655016  | 0.335197  |
| C  | 2.501185  | 2.068950  | 0.663912  |
| C  | 2.495225  | -0.273066 | 1.446566  |
| C  | 2.822416  | 0.273387  | -0.908304 |
| N  | -0.288148 | -1.582654 | 0.223543  |
| C  | -1.741077 | -1.891858 | 0.463226  |
| C  | 0.554605  | -2.086612 | 1.356422  |
| C  | 0.107383  | -2.268053 | -1.032998 |
| C  | 2.047548  | -1.733475 | 1.292272  |
| H  | 1.752003  | 3.944319  | 1.368506  |
| H  | 1.158419  | 2.556318  | 2.285326  |
| H  | 3.362026  | 2.062958  | 1.337633  |
| H  | 2.833297  | 2.534371  | -0.261792 |
| H  | 2.504897  | -2.263789 | 2.132826  |
| H  | 2.501738  | -2.175170 | 0.404954  |
| H  | 0.122098  | -1.705103 | 2.276793  |
| H  | 0.470158  | -3.179794 | 1.372644  |
| H  | -0.888387 | 3.109360  | 2.297524  |
| H  | -0.903628 | 4.531650  | 1.257685  |
| H  | -2.486116 | 3.208392  | -0.313022 |
| H  | -3.091108 | 3.774276  | 1.213971  |

|   |           |           |           |
|---|-----------|-----------|-----------|
| H | -2.641059 | 1.480543  | 2.210486  |
| H | -3.998503 | 1.647860  | 1.099186  |
| H | -2.690889 | -0.326041 | -1.557221 |
| H | -4.154645 | 0.277670  | -0.757911 |
| H | -2.974272 | 1.405871  | -1.469191 |
| H | -2.223384 | -0.594561 | 2.123085  |
| H | -3.596813 | -1.047828 | 1.108454  |
| H | -2.178527 | -2.148215 | -0.499641 |
| H | -1.828895 | -2.781119 | 1.093027  |
| H | 1.155375  | -2.100103 | -1.254181 |
| H | -0.060446 | -3.346268 | -0.939674 |
| H | -0.477757 | -1.882059 | -1.861066 |
| H | 2.597484  | -0.749591 | -1.187658 |
| H | 2.513461  | 0.921156  | -1.722550 |
| H | 3.903591  | 0.364627  | -0.760263 |
| H | 1.105107  | 3.221346  | -1.374832 |
| H | -0.604006 | 3.622823  | -1.352543 |
| H | 0.565475  | 4.684110  | -0.527663 |
| O | -0.099601 | 0.718693  | -1.779311 |
| C | -0.513755 | 1.206070  | -2.877488 |
| O | -1.312189 | 2.106301  | -3.090161 |
| C | 0.128159  | 0.499666  | -4.121091 |
| F | -0.283651 | 1.032356  | -5.281896 |
| F | 1.477938  | 0.585568  | -4.095244 |
| F | -0.188284 | -0.816344 | -4.149859 |
| H | 3.589499  | -0.264908 | 1.518690  |
| H | 2.097772  | 0.141160  | 2.368767  |
| H | 0.640782  | 1.173356  | 4.838737  |
| H | -1.188303 | 1.137391  | 4.807831  |
| H | -0.242939 | -0.428579 | 4.822816  |

$5\pi\text{TS}_{\text{H}}\text{-}[\text{Fe}^{\text{IV}}=\text{O}(\text{TMC})(\text{CF}_3\text{CO}_2)]^{\dagger}$

|    |           |           |           |
|----|-----------|-----------|-----------|
| Fe | -0.081428 | 0.757750  | 0.223785  |
| O  | -0.230696 | 0.730108  | 1.980154  |
| C  | 0.902408  | 1.215783  | 4.179885  |
| H  | 0.435505  | 0.993504  | 2.859925  |
| N  | -2.257223 | 0.602134  | 0.381203  |
| C  | -2.790583 | 1.767422  | 1.159381  |
| C  | -2.434406 | -0.655612 | 1.167795  |
| C  | -3.000059 | 0.496104  | -0.898471 |
| N  | 0.199678  | 2.971907  | 0.333942  |
| C  | 1.475272  | 3.040810  | 1.096129  |
| C  | -0.918515 | 3.568549  | 1.127912  |
| C  | 0.342865  | 3.707428  | -0.944465 |
| C  | -2.323456 | 3.147705  | 0.683163  |
| N  | 2.121202  | 0.725695  | 0.224706  |
| C  | 2.555205  | 2.141590  | 0.501327  |
| C  | 2.586913  | -0.194278 | 1.315726  |
| C  | 2.760633  | 0.313986  | -1.054290 |
| N  | -0.233220 | -1.552012 | 0.249926  |
| C  | -1.674856 | -1.827857 | 0.555054  |
| C  | 0.646190  | -2.001193 | 1.372107  |
| C  | 0.107439  | -2.301640 | -0.983199 |
| C  | 2.133984  | -1.656487 | 1.220472  |
| H  | 1.857078  | 4.068118  | 1.103180  |
| H  | 1.266017  | 2.767733  | 2.123772  |
| H  | 3.418434  | 2.136539  | 1.170854  |

---

|   |           |           |           |
|---|-----------|-----------|-----------|
| H | 2.894894  | 2.565197  | -0.441062 |
| H | 2.638931  | -2.163399 | 2.048022  |
| H | 2.541347  | -2.118450 | 0.321060  |
| H | 0.254402  | -1.566361 | 2.287992  |
| H | 0.560973  | -3.091897 | 1.455654  |
| H | -0.776320 | 3.281670  | 2.167904  |
| H | -0.831536 | 4.659225  | 1.071640  |
| H | -2.443920 | 3.257699  | -0.397024 |
| H | -3.014009 | 3.869917  | 1.125896  |
| H | -2.495731 | 1.627858  | 2.196539  |
| H | -3.883733 | 1.721083  | 1.112051  |
| H | -2.605763 | -0.315412 | -1.503134 |
| H | -4.056428 | 0.298880  | -0.691618 |
| H | -2.907471 | 1.417497  | -1.463371 |
| H | -2.093157 | -0.460816 | 2.178164  |
| H | -3.497732 | -0.916125 | 1.204860  |
| H | -2.153098 | -2.122219 | -0.377259 |
| H | -1.755176 | -2.685172 | 1.229689  |
| H | 1.148052  | -2.159977 | -1.252622 |
| H | -0.068457 | -3.373048 | -0.834858 |
| H | -0.504837 | -1.950209 | -1.807927 |
| H | 2.469985  | -0.693171 | -1.327337 |
| H | 2.453558  | 0.981298  | -1.851526 |
| H | 3.849428  | 0.351816  | -0.947869 |
| H | 1.119178  | 3.257250  | -1.558033 |
| H | -0.586205 | 3.671499  | -1.503267 |
| H | 0.612278  | 4.749713  | -0.743508 |
| O | -0.069517 | 0.652276  | -1.768578 |
| C | -0.519037 | 1.131857  | -2.858559 |
| O | -1.284528 | 2.059846  | -3.064424 |
| C | 0.012455  | 0.345812  | -4.106746 |
| F | -0.254457 | 0.987311  | -5.254718 |
| F | 1.345573  | 0.146237  | -4.057360 |
| F | -0.573268 | -0.874281 | -4.181478 |
| H | 3.683085  | -0.183658 | 1.306110  |
| H | 2.272339  | 0.227912  | 2.263514  |
| H | 1.890093  | 1.656910  | 4.095328  |
| H | 0.132610  | 1.878688  | 4.561077  |
| H | 0.880412  | 0.208031  | 4.580884  |

## IN

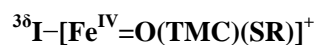

|    |           |           |           |
|----|-----------|-----------|-----------|
| Fe | -0.255839 | 0.679478  | 0.232953  |
| O  | -0.583238 | 0.697482  | 2.049438  |
| C  | 0.734082  | 0.811700  | 5.321142  |
| H  | 0.125383  | 0.532035  | 2.677031  |
| N  | -2.613451 | 0.591613  | 0.206466  |
| C  | -3.114533 | 1.733780  | 1.011196  |
| C  | -2.760498 | -0.702867 | 0.909381  |
| C  | -3.326202 | 0.562561  | -1.083491 |
| N  | 0.027864  | 2.780269  | 0.392617  |
| C  | 1.231086  | 2.898953  | 1.277690  |
| C  | -1.135701 | 3.413692  | 1.108802  |
| C  | 0.261002  | 3.507061  | -0.881230 |
| C  | -2.536033 | 3.088872  | 0.581156  |
| N  | 2.136799  | 0.660275  | 0.500001  |

---

|   |           |           |           |
|---|-----------|-----------|-----------|
| C | 2.430252  | 2.090700  | 0.794354  |
| C | 2.364538  | -0.227771 | 1.669797  |
| C | 3.025727  | 0.244323  | -0.607749 |
| N | -0.394677 | -1.419439 | 0.201240  |
| C | -1.859205 | -1.779613 | 0.302255  |
| C | 0.347835  | -1.979824 | 1.383405  |
| C | 0.154871  | -2.002603 | -1.066422 |
| C | 1.851766  | -1.668704 | 1.503873  |
| H | 1.529150  | 3.951016  | 1.345845  |
| H | 0.926309  | 2.578868  | 2.269316  |
| H | 3.227610  | 2.179009  | 1.541467  |
| H | 2.817509  | 2.536874  | -0.119994 |
| H | 2.170292  | -2.203204 | 2.404095  |
| H | 2.396756  | -2.152475 | 0.692916  |
| H | -0.181648 | -1.641123 | 2.270053  |
| H | 0.249630  | -3.070539 | 1.340535  |
| H | -1.075692 | 3.100168  | 2.147824  |
| H | -0.978754 | 4.496968  | 1.071842  |
| H | -2.592057 | 3.215025  | -0.502720 |
| H | -3.192780 | 3.859438  | 0.994782  |
| H | -2.853768 | 1.551325  | 2.051242  |
| H | -4.210045 | 1.771922  | 0.940918  |
| H | -2.972160 | -0.253115 | -1.706509 |
| H | -4.404685 | 0.437212  | -0.919749 |
| H | -3.156476 | 1.486653  | -1.630381 |
| H | -2.507767 | -0.546383 | 1.952896  |
| H | -3.794363 | -1.069743 | 0.855031  |
| H | -2.204893 | -2.014908 | -0.701194 |
| H | -1.956475 | -2.696425 | 0.888633  |
| H | 2.886886  | -0.805238 | -0.846778 |
| H | 2.792680  | 0.820633  | -1.499167 |
| H | 4.077532  | 0.397299  | -0.334595 |
| H | 1.087772  | 3.063532  | -1.428373 |
| H | -0.627875 | 3.453702  | -1.504866 |
| H | 0.490574  | 4.556497  | -0.672533 |
| H | 3.443554  | -0.286091 | 1.871188  |
| H | 1.930723  | 0.239329  | 2.554475  |
| S | -0.091483 | 0.573483  | -2.065788 |
| C | -0.312461 | -1.248512 | -2.293885 |
| H | 0.283115  | -1.557647 | -3.153461 |
| H | -1.354950 | -1.456631 | -2.532801 |
| H | 1.236993  | -1.956933 | -1.014010 |
| H | -0.127928 | -3.060570 | -1.122740 |
| H | 1.567526  | 0.155312  | 5.524848  |
| H | 0.891153  | 1.879030  | 5.263139  |
| H | -0.267883 | 0.412058  | 5.267965  |

${}^3\pi\text{IN}=[\text{Fe}^{\text{IV}}=\text{O}(\text{TMC})(\text{SR})]^+$

|    |           |           |           |
|----|-----------|-----------|-----------|
| Fe | -0.124578 | 0.573509  | 0.190467  |
| O  | -0.206629 | 0.397981  | 2.055372  |
| C  | 0.269219  | 2.207234  | 5.237854  |
| H  | 0.018969  | 1.171012  | 2.579135  |
| N  | -2.273657 | 0.539575  | 0.333608  |
| C  | -2.790878 | 1.595934  | 1.257849  |
| C  | -2.505800 | -0.790016 | 0.974040  |
| C  | -3.062484 | 0.621653  | -0.925319 |
| N  | 0.118808  | 2.679544  | 0.442661  |



---

|   |           |           |           |
|---|-----------|-----------|-----------|
| C | 1.413829  | 2.800362  | 1.178422  |
| C | -0.934158 | 3.345980  | 1.275736  |
| C | 0.217033  | 3.426095  | -0.841222 |
| C | -2.371646 | 3.016904  | 0.899951  |
| N | 2.069993  | 0.541564  | 0.267386  |
| C | 2.494538  | 1.953708  | 0.548825  |
| C | 2.442534  | -0.364602 | 1.405359  |
| C | 2.878129  | 0.131487  | -0.919036 |
| N | -0.283616 | -1.511152 | 0.071877  |
| C | -1.735488 | -1.867762 | 0.245806  |
| C | 0.507614  | -2.146136 | 1.179464  |
| C | 0.158243  | -2.059724 | -1.250367 |
| C | 2.004599  | -1.821605 | 1.228821  |
| H | 1.740884  | 3.845768  | 1.190635  |
| H | 1.251641  | 2.514391  | 2.214549  |
| H | 3.381760  | 1.955371  | 1.187965  |
| H | 2.791505  | 2.397050  | -0.399206 |
| H | 2.386956  | -2.355682 | 2.103970  |
| H | 2.521725  | -2.271098 | 0.380536  |
| H | 0.040931  | -1.836696 | 2.109417  |
| H | 0.400416  | -3.232406 | 1.081094  |
| H | -0.774064 | 3.061384  | 2.315360  |
| H | -0.771565 | 4.427112  | 1.217738  |
| H | -2.576695 | 3.249032  | -0.146546 |
| H | -3.006146 | 3.693090  | 1.479143  |
| H | -2.434556 | 1.354431  | 2.255941  |
| H | -3.883688 | 1.525438  | 1.264563  |
| H | -2.790484 | -0.175343 | -1.606170 |
| H | -4.127468 | 0.539939  | -0.686421 |
| H | -2.874862 | 1.564363  | -1.428027 |
| H | -2.170916 | -0.713402 | 2.002987  |
| H | -3.574172 | -1.030054 | 0.964644  |
| H | -2.163997 | -2.032615 | -0.739916 |
| H | -1.819276 | -2.814188 | 0.785131  |
| H | 2.711101  | -0.906642 | -1.173796 |
| H | 2.604880  | 0.737443  | -1.775483 |
| H | 3.939774  | 0.264241  | -0.687477 |
| H | 0.984171  | 2.994984  | -1.476662 |
| H | -0.729208 | 3.372363  | -1.372238 |
| H | 0.460204  | 4.474517  | -0.643659 |
| H | 3.534380  | -0.344696 | 1.501354  |
| H | 2.010186  | 0.040251  | 2.313535  |
| S | -0.094950 | 0.568785  | -2.112518 |
| C | -0.355143 | -1.235026 | -2.417310 |
| H | 0.191207  | -1.515978 | -3.318321 |
| H | -1.410420 | -1.429040 | -2.615151 |
| H | 1.241576  | -2.076330 | -1.268275 |
| H | -0.179256 | -3.099801 | -1.330921 |
| H | 1.283316  | 2.579361  | 5.237036  |
| H | -0.557707 | 2.900899  | 5.283307  |
| H | 0.082981  | 1.144221  | 5.284065  |

<sup>56</sup>IN-[Fe<sup>IV</sup>=O(TMC)(SR)]<sup>+</sup>

|    |           |           |          |
|----|-----------|-----------|----------|
| Fe | -0.109461 | 0.760764  | 0.221318 |
| O  | -0.121752 | 0.897062  | 2.107834 |
| C  | -0.696384 | -0.380887 | 5.212283 |
| H  | -0.320186 | 0.376333  | 2.892220 |

---

|   |           |           |           |
|---|-----------|-----------|-----------|
| N | -2.385839 | 0.635883  | 0.405863  |
| C | -2.843560 | 1.806059  | 1.212429  |
| C | -2.500082 | -0.632146 | 1.179940  |
| C | -3.208751 | 0.552621  | -0.821464 |
| N | 0.158631  | 2.956081  | 0.293454  |
| C | 1.426485  | 3.071160  | 1.081015  |
| C | -0.954999 | 3.592298  | 1.068206  |
| C | 0.291456  | 3.616024  | -1.025599 |
| C | -2.376527 | 3.168676  | 0.679749  |
| N | 2.210812  | 0.767560  | 0.306871  |
| C | 2.556331  | 2.210359  | 0.527750  |
| C | 2.542808  | -0.075287 | 1.496384  |
| C | 3.006072  | 0.308348  | -0.857945 |
| N | -0.238887 | -1.462697 | 0.302757  |
| C | -1.686240 | -1.774753 | 0.566200  |
| C | 0.624244  | -1.947244 | 1.427238  |
| C | 0.177948  | -2.093623 | -0.981668 |
| C | 2.111905  | -1.549864 | 1.399853  |
| H | 1.762759  | 4.114601  | 1.088472  |
| H | 1.191662  | 2.773254  | 2.097307  |
| H | 3.414043  | 2.289782  | 1.203486  |
| H | 2.879640  | 2.610829  | -0.431498 |
| H | 2.543230  | -2.035588 | 2.280411  |
| H | 2.607411  | -2.027876 | 0.554471  |
| H | 0.169925  | -1.601054 | 2.352302  |
| H | 0.579600  | -3.043276 | 1.440440  |
| H | -0.793968 | 3.349223  | 2.115918  |
| H | -0.861651 | 4.678357  | 0.955121  |
| H | -2.532804 | 3.246713  | -0.399001 |
| H | -3.041376 | 3.916544  | 1.119729  |
| H | -2.471912 | 1.676921  | 2.226141  |
| H | -3.939159 | 1.791649  | 1.249851  |
| H | -2.909243 | -0.293632 | -1.430195 |
| H | -4.265924 | 0.443146  | -0.553565 |
| H | -3.082508 | 1.449502  | -1.421506 |
| H | -2.174425 | -0.430198 | 2.195528  |
| H | -3.546709 | -0.955581 | 1.230649  |
| H | -2.137232 | -2.067926 | -0.378981 |
| H | -1.757688 | -2.645471 | 1.223827  |
| H | 2.820311  | -0.738849 | -1.070224 |
| H | 2.726456  | 0.877813  | -1.739461 |
| H | 4.075794  | 0.438994  | -0.656340 |
| H | 1.062287  | 3.131810  | -1.619943 |
| H | -0.647303 | 3.544223  | -1.571110 |
| H | 0.549098  | 4.672654  | -0.897342 |
| H | 3.632138  | -0.060628 | 1.631925  |
| H | 2.086590  | 0.391620  | 2.364274  |
| S | -0.135488 | 0.443253  | -2.161014 |
| C | -0.387296 | -1.391485 | -2.208100 |
| H | 0.116081  | -1.783051 | -3.092062 |
| H | -1.450649 | -1.598054 | -2.334538 |
| H | 1.262345  | -2.070160 | -1.030374 |
| H | -0.122934 | -3.149054 | -0.982489 |
| H | 0.368072  | -0.482040 | 5.367584  |
| H | -1.171264 | 0.578470  | 5.357933  |
| H | -1.300882 | -1.260835 | 5.044447  |

---

$5\pi\text{IN}[\text{Fe}^{\text{IV}}=\text{O}(\text{TMC})(\text{SR})]^+$

|    |           |           |           |
|----|-----------|-----------|-----------|
| Fe | -0.114837 | 0.584487  | 0.179263  |
| O  | -0.133731 | 0.386709  | 2.048089  |
| C  | -0.201192 | 2.260823  | 5.176084  |
| H  | -0.163524 | 1.184629  | 2.583517  |
| N  | -2.412613 | 0.527540  | 0.379270  |
| C  | -2.829917 | 1.622885  | 1.296075  |
| C  | -2.525236 | -0.802021 | 1.033103  |
| C  | -3.251212 | 0.574836  | -0.836940 |
| N  | 0.208145  | 2.695099  | 0.439142  |
| C  | 1.503567  | 2.759766  | 1.190465  |
| C  | -0.866662 | 3.333728  | 1.274371  |
| C  | 0.327571  | 3.462886  | -0.827816 |
| C  | -2.313948 | 3.010238  | 0.892994  |
| N  | 2.261611  | 0.529854  | 0.229521  |
| C  | 2.617254  | 1.942066  | 0.547993  |
| C  | 2.571861  | -0.399140 | 1.354317  |
| C  | 3.048954  | 0.146352  | -0.964530 |
| N  | -0.266136 | -1.528646 | 0.071952  |
| C  | -1.719816 | -1.866672 | 0.290431  |
| C  | 0.568972  | -2.147300 | 1.157773  |
| C  | 0.151194  | -2.053563 | -1.267784 |
| C  | 2.076596  | -1.840613 | 1.153942  |
| H  | 1.834096  | 3.802302  | 1.253333  |
| H  | 1.323982  | 2.417984  | 2.205294  |
| H  | 3.491027  | 1.977766  | 1.208110  |
| H  | 2.916080  | 2.418404  | -0.384357 |
| H  | 2.473943  | -2.408144 | 2.001311  |
| H  | 2.552671  | -2.283809 | 0.278628  |
| H  | 0.136994  | -1.823949 | 2.099927  |
| H  | 0.450956  | -3.234359 | 1.079269  |
| H  | -0.701514 | 3.053584  | 2.315019  |
| H  | -0.717608 | 4.417193  | 1.224030  |
| H  | -2.490435 | 3.201352  | -0.167543 |
| H  | -2.929266 | 3.741942  | 1.423270  |
| H  | -2.473971 | 1.376724  | 2.294559  |
| H  | -3.925628 | 1.649213  | 1.339729  |
| H  | -2.971702 | -0.211770 | -1.530428 |
| H  | -4.307415 | 0.452616  | -0.568997 |
| H  | -3.120586 | 1.524138  | -1.349405 |
| H  | -2.160931 | -0.701203 | 2.050031  |
| H  | -3.571205 | -1.130583 | 1.066178  |
| H  | -2.165785 | -2.044943 | -0.685314 |
| H  | -1.786475 | -2.808131 | 0.840929  |
| H  | 2.873638  | -0.889763 | -1.233028 |
| H  | 2.756022  | 0.763084  | -1.810130 |
| H  | 4.121063  | 0.273598  | -0.769910 |
| H  | 1.083541  | 3.021786  | -1.470361 |
| H  | -0.620280 | 3.446871  | -1.359771 |
| H  | 0.599610  | 4.500112  | -0.609512 |
| H  | 3.661998  | -0.433277 | 1.488608  |
| H  | 2.129541  | 0.011581  | 2.256864  |
| S  | -0.152239 | 0.581976  | -2.104558 |
| C  | -0.405118 | -1.226013 | -2.410177 |
| H  | 0.114610  | -1.492093 | -3.331122 |
| H  | -1.465645 | -1.417787 | -2.574776 |
| H  | 1.234719  | -2.036442 | -1.310879 |

---

|                                                                |           |           |           |
|----------------------------------------------------------------|-----------|-----------|-----------|
| H                                                              | -0.162429 | -3.100784 | -1.355275 |
| H                                                              | 0.711155  | 2.839681  | 5.177960  |
| H                                                              | -1.157769 | 2.762571  | 5.196138  |
| H                                                              | -0.156189 | 1.183830  | 5.246698  |
| <b><sup>36</sup>I-[Fe<sup>IV</sup>=O(TMC)(OH)]<sup>+</sup></b> |           |           |           |
| Fe                                                             | -0.218736 | 0.858268  | 0.086695  |
| O                                                              | -0.379660 | 1.280085  | 1.860402  |
| C                                                              | -1.746373 | 0.131691  | 4.921055  |
| H                                                              | -0.851357 | 0.685180  | 2.449956  |
| N                                                              | -2.493654 | 0.771438  | 0.002329  |
| C                                                              | -3.070258 | 2.043640  | 0.515191  |
| C                                                              | -2.764136 | -0.348755 | 0.932709  |
| C                                                              | -3.038484 | 0.474197  | -1.337551 |
| N                                                              | 0.075340  | 2.995755  | -0.107571 |
| C                                                              | 1.268250  | 3.245526  | 0.753236  |
| C                                                              | -1.099640 | 3.739789  | 0.442637  |
| C                                                              | 0.337856  | 3.445221  | -1.494027 |
| C                                                              | -2.471230 | 3.315648  | -0.094442 |
| N                                                              | 2.112041  | 0.874064  | 0.364918  |
| C                                                              | 2.445537  | 2.327789  | 0.425239  |
| C                                                              | 2.328046  | 0.202066  | 1.677582  |
| C                                                              | 2.971337  | 0.256586  | -0.667109 |
| N                                                              | -0.407974 | -1.280519 | 0.511495  |
| C                                                              | -1.877062 | -1.568374 | 0.669032  |
| C                                                              | 0.351025  | -1.593816 | 1.765636  |
| C                                                              | 0.092456  | -2.155679 | -0.581356 |
| C                                                              | 1.852039  | -1.257876 | 1.764086  |
| H                                                              | 1.600901  | 4.283090  | 0.633621  |
| H                                                              | 0.954708  | 3.104360  | 1.782254  |
| H                                                              | 3.235427  | 2.507183  | 1.163408  |
| H                                                              | 2.859677  | 2.607258  | -0.542020 |
| H                                                              | 2.222880  | -1.629548 | 2.723840  |
| H                                                              | 2.364901  | -1.866998 | 1.018155  |
| H                                                              | -0.139121 | -1.092600 | 2.597556  |
| H                                                              | 0.254254  | -2.670219 | 1.952337  |
| H                                                              | -1.087068 | 3.605135  | 1.521929  |
| H                                                              | -0.946724 | 4.805379  | 0.234221  |
| H                                                              | -2.472917 | 3.266469  | -1.185583 |
| H                                                              | -3.158368 | 4.128887  | 0.156550  |
| H                                                              | -2.913030 | 2.068989  | 1.592805  |
| H                                                              | -4.154560 | 2.037125  | 0.341619  |
| H                                                              | -2.582875 | -0.424520 | -1.742860 |
| H                                                              | -4.126388 | 0.340232  | -1.287388 |
| H                                                              | -2.811856 | 1.289124  | -2.020599 |
| H                                                              | -2.631293 | 0.015669  | 1.949312  |
| H                                                              | -3.807994 | -0.679535 | 0.857484  |
| H                                                              | -2.209753 | -2.050743 | -0.247238 |
| H                                                              | -2.026662 | -2.292408 | 1.474546  |
| H                                                              | 1.153628  | -2.002489 | -0.744037 |
| H                                                              | -0.071074 | -3.206812 | -0.321939 |
| H                                                              | -0.431075 | -1.920021 | -1.502464 |
| H                                                              | 2.768912  | -0.806282 | -0.764537 |
| H                                                              | 2.792806  | 0.729085  | -1.632639 |
| H                                                              | 4.033390  | 0.377438  | -0.419130 |
| H                                                              | 1.184072  | 2.912097  | -1.915459 |
| H                                                              | -0.523853 | 3.240647  | -2.122508 |

---

|   |           |           |           |
|---|-----------|-----------|-----------|
| H | 0.547439  | 4.520706  | -1.501361 |
| H | 3.404049  | 0.213053  | 1.901785  |
| H | 1.821869  | 0.795857  | 2.433760  |
| O | -0.109923 | 0.575807  | -1.702455 |
| H | 0.741912  | 0.232667  | -1.996415 |
| H | -0.714669 | 0.307483  | 5.189371  |
| H | -2.423301 | 0.967669  | 4.817683  |
| H | -2.127478 | -0.878220 | 4.877925  |

$3\pi\text{IN}-[\text{Fe}^{\text{IV}}=\text{O}(\text{TMC})(\text{OH})]^+$

|    |           |           |           |
|----|-----------|-----------|-----------|
| Fe | -0.179034 | 0.814890  | 0.109810  |
| O  | -0.326529 | 1.229331  | 1.940094  |
| C  | -2.042487 | 0.212778  | 4.979080  |
| H  | -0.943967 | 0.723160  | 2.474272  |
| N  | -2.300046 | 0.751605  | 0.005982  |
| C  | -2.970986 | 1.976395  | 0.541469  |
| C  | -2.663247 | -0.394829 | 0.887091  |
| C  | -2.821582 | 0.497173  | -1.364467 |
| N  | 0.057279  | 2.918148  | -0.088871 |
| C  | 1.256932  | 3.198909  | 0.755658  |
| C  | -1.087115 | 3.691221  | 0.485613  |
| C  | 0.293349  | 3.396401  | -1.475122 |
| C  | -2.462059 | 3.291571  | -0.032123 |
| N  | 1.959555  | 0.826717  | 0.349336  |
| C  | 2.392764  | 2.266154  | 0.403783  |
| C  | 2.273863  | 0.157289  | 1.655570  |
| C  | 2.772910  | 0.191212  | -0.722523 |
| N  | -0.355327 | -1.298915 | 0.450724  |
| C  | -1.822220 | -1.609821 | 0.567709  |
| C  | 0.349536  | -1.641580 | 1.728371  |
| C  | 0.154045  | -2.190492 | -0.629859 |
| C  | 1.843453  | -1.307385 | 1.766917  |
| H  | 1.578684  | 4.236867  | 0.618232  |
| H  | 0.956529  | 3.057338  | 1.787965  |
| H  | 3.204893  | 2.383259  | 1.125757  |
| H  | 2.802029  | 2.525548  | -0.570399 |
| H  | 2.197607  | -1.646901 | 2.744431  |
| H  | 2.385242  | -1.920708 | 1.045323  |
| H  | -0.160229 | -1.132962 | 2.542150  |
| H  | 0.236966  | -2.719099 | 1.894538  |
| H  | -1.061678 | 3.542010  | 1.562233  |
| H  | -0.907344 | 4.752134  | 0.281382  |
| H  | -2.505100 | 3.300329  | -1.123219 |
| H  | -3.160441 | 4.067224  | 0.293699  |
| H  | -2.823221 | 1.989230  | 1.619782  |
| H  | -4.045538 | 1.878389  | 0.352831  |
| H  | -2.353871 | -0.380228 | -1.794090 |
| H  | -3.906583 | 0.359465  | -1.318142 |
| H  | -2.588447 | 1.336823  | -2.010830 |
| H  | -2.537735 | -0.084255 | 1.921436  |
| H  | -3.721735 | -0.646983 | 0.762118  |
| H  | -2.144100 | -2.028743 | -0.382464 |
| H  | -1.981275 | -2.384155 | 1.322787  |
| H  | 1.233885  | -2.153125 | -0.693900 |
| H  | -0.138677 | -3.222951 | -0.415488 |
| H  | -0.254191 | -1.866883 | -1.580711 |
| H  | 2.535951  | -0.858684 | -0.830252 |

---

|   |           |           |           |
|---|-----------|-----------|-----------|
| H | 2.585025  | 0.678548  | -1.674603 |
| H | 3.836254  | 0.288538  | -0.481260 |
| H | 1.186300  | 2.942767  | -1.896635 |
| H | -0.550650 | 3.143619  | -2.110044 |
| H | 0.432697  | 4.481841  | -1.474139 |
| H | 3.359943  | 0.203095  | 1.797258  |
| H | 1.793779  | 0.741120  | 2.434203  |
| O | -0.067999 | 0.477411  | -1.718059 |
| H | 0.576412  | 1.024580  | -2.176457 |
| H | -1.111276 | 0.717968  | 5.189829  |
| H | -2.937754 | 0.787967  | 4.792244  |
| H | -2.099003 | -0.864151 | 5.043489  |

$^{56}\text{Fe}^{\text{IV}}-\text{[Fe}^{\text{IV}}=\text{O}(\text{TMC})(\text{OH})]^+$

|    |           |           |           |
|----|-----------|-----------|-----------|
| Fe | -0.207622 | 0.652760  | 0.207065  |
| O  | -0.490386 | 0.564867  | 2.088948  |
| C  | 0.745742  | 0.858641  | 5.279469  |
| H  | 0.059795  | 0.652485  | 2.871866  |
| N  | -2.442357 | 0.533804  | 0.170464  |
| C  | -3.022327 | 1.660677  | 0.959743  |
| C  | -2.675239 | -0.762997 | 0.868626  |
| C  | -3.032728 | 0.515281  | -1.184752 |
| N  | 0.069438  | 2.856145  | 0.490062  |
| C  | 1.268177  | 2.877924  | 1.376118  |
| C  | -1.113729 | 3.421847  | 1.205825  |
| C  | 0.323710  | 3.624861  | -0.748868 |
| C  | -2.480591 | 3.054754  | 0.611225  |
| N  | 2.056260  | 0.605973  | 0.486573  |
| C  | 2.418496  | 2.018110  | 0.851446  |
| C  | 2.360373  | -0.350894 | 1.592337  |
| C  | 2.841892  | 0.242160  | -0.718046 |
| N  | -0.375572 | -1.631495 | 0.150223  |
| C  | -1.848090 | -1.905404 | 0.280077  |
| C  | 0.376106  | -2.127769 | 1.345039  |
| C  | 0.101758  | -2.323544 | -1.069490 |
| C  | 1.879110  | -1.798127 | 1.385514  |
| H  | 1.639354  | 3.904564  | 1.484183  |
| H  | 0.951910  | 2.541266  | 2.358471  |
| H  | 3.219060  | 2.015843  | 1.597202  |
| H  | 2.829905  | 2.483991  | -0.041571 |
| H  | 2.270515  | -2.353224 | 2.243482  |
| H  | 2.383093  | -2.235281 | 0.522629  |
| H  | -0.116314 | -1.719064 | 2.222996  |
| H  | 0.279144  | -3.220815 | 1.374739  |
| H  | -1.073443 | 3.065731  | 2.233237  |
| H  | -1.013088 | 4.513513  | 1.223656  |
| H  | -2.500249 | 3.228425  | -0.467427 |
| H  | -3.194451 | 3.769883  | 1.028825  |
| H  | -2.819391 | 1.456707  | 2.008552  |
| H  | -4.109645 | 1.655349  | 0.815232  |
| H  | -2.575493 | -0.261415 | -1.790368 |
| H  | -4.113461 | 0.340545  | -1.123799 |
| H  | -2.850191 | 1.464097  | -1.682137 |
| H  | -2.418542 | -0.612349 | 1.911940  |
| H  | -3.733759 | -1.042859 | 0.801070  |
| H  | -2.217951 | -2.144303 | -0.715467 |
| H  | -2.005275 | -2.799046 | 0.892211  |

---

|   |           |           |           |
|---|-----------|-----------|-----------|
| H | 1.161184  | -2.148106 | -1.229638 |
| H | -0.058932 | -3.404785 | -0.988174 |
| H | -0.441959 | -1.957397 | -1.937990 |
| H | 2.641117  | -0.781635 | -1.016279 |
| H | 2.564736  | 0.896339  | -1.540184 |
| H | 3.914780  | 0.338074  | -0.517366 |
| H | 1.132730  | 3.173930  | -1.314332 |
| H | -0.560578 | 3.610737  | -1.380802 |
| H | 0.575925  | 4.662921  | -0.503402 |
| H | 3.449255  | -0.382218 | 1.728131  |
| H | 1.941437  | 0.053112  | 2.510645  |
| O | -0.040764 | 0.836442  | -1.676002 |
| H | 0.274002  | 0.107225  | -2.218674 |
| H | -0.326986 | 0.944103  | 5.374225  |
| H | 1.217855  | -0.108935 | 5.369738  |
| H | 1.353412  | 1.750633  | 5.226272  |

$5\pi\text{IN}[\text{Fe}^{\text{IV}}=\text{O}(\text{TMC})(\text{OH})]^+$

|    |           |           |           |
|----|-----------|-----------|-----------|
| Fe | -0.178570 | 0.829863  | 0.070543  |
| O  | -0.402193 | 1.254728  | 1.835180  |
| C  | -1.668237 | 0.120725  | 4.957351  |
| H  | -0.770043 | 0.599171  | 2.433562  |
| N  | -2.353710 | 0.717502  | -0.053662 |
| C  | -2.980129 | 1.975784  | 0.462726  |
| C  | -2.679510 | -0.414284 | 0.861253  |
| C  | -2.879064 | 0.427092  | -1.408942 |
| N  | 0.087239  | 3.087666  | -0.118054 |
| C  | 1.249642  | 3.279060  | 0.785427  |
| C  | -1.114228 | 3.786870  | 0.413255  |
| C  | 0.395603  | 3.579926  | -1.475137 |
| C  | -2.452156 | 3.282326  | -0.139426 |
| N  | 1.999461  | 0.860692  | 0.414964  |
| C  | 2.391059  | 2.308004  | 0.485453  |
| C  | 2.252505  | 0.168740  | 1.717871  |
| C  | 2.813659  | 0.235444  | -0.655031 |
| N  | -0.371342 | -1.432950 | 0.488092  |
| C  | -1.842599 | -1.666853 | 0.595822  |
| C  | 0.342259  | -1.707301 | 1.766199  |
| C  | 0.146297  | -2.323221 | -0.576382 |
| C  | 1.827899  | -1.308312 | 1.803944  |
| H  | 1.645073  | 4.299097  | 0.695131  |
| H  | 0.897427  | 3.139451  | 1.802195  |
| H  | 3.169351  | 2.442381  | 1.242553  |
| H  | 2.839887  | 2.566672  | -0.471756 |
| H  | 2.194679  | -1.653354 | 2.775189  |
| H  | 2.384088  | -1.899782 | 1.075305  |
| H  | -0.194713 | -1.212483 | 2.575354  |
| H  | 0.283164  | -2.783584 | 1.978893  |
| H  | -1.114219 | 3.660702  | 1.494290  |
| H  | -1.020120 | 4.860378  | 0.203196  |
| H  | -2.439590 | 3.240405  | -1.231399 |
| H  | -3.195179 | 4.046763  | 0.105332  |
| H  | -2.819612 | 1.999453  | 1.538538  |
| H  | -4.060397 | 1.908239  | 0.287204  |
| H  | -2.394784 | -0.450296 | -1.826371 |
| H  | -3.960479 | 0.259312  | -1.363117 |
| H  | -2.689098 | 1.267178  | -2.073388 |

---

|   |           |           |           |
|---|-----------|-----------|-----------|
| H | -2.547432 | -0.063588 | 1.881590  |
| H | -3.736044 | -0.686304 | 0.757492  |
| H | -2.170149 | -2.115438 | -0.339910 |
| H | -2.058815 | -2.398692 | 1.381565  |
| H | 1.224937  | -2.242840 | -0.659309 |
| H | -0.103988 | -3.368496 | -0.358298 |
| H | -0.282991 | -2.031714 | -1.530895 |
| H | 2.592414  | -0.822208 | -0.743264 |
| H | 2.579103  | 0.703476  | -1.605909 |
| H | 3.880327  | 0.352531  | -0.432997 |
| H | 1.221715  | 3.022268  | -1.908860 |
| H | -0.469181 | 3.457396  | -2.125678 |
| H | 0.657752  | 4.644880  | -1.449735 |
| H | 3.331644  | 0.208701  | 1.914641  |
| H | 1.749754  | 0.745392  | 2.489130  |
| O | 0.081840  | 0.508966  | -1.697994 |
| H | -0.401884 | 1.103715  | -2.282261 |
| H | -0.633140 | 0.259865  | 5.233663  |
| H | -2.302023 | 0.981657  | 4.800368  |
| H | -2.094119 | -0.871957 | 4.944145  |

$3\sigma$ IN-[Fe<sup>IV</sup>=O(TMC)(F)]<sup>+</sup>

|    |           |           |           |
|----|-----------|-----------|-----------|
| Fe | -0.084339 | 0.579724  | 0.312099  |
| O  | -0.062207 | 0.391205  | 2.113046  |
| C  | -1.006364 | 1.797600  | 5.170079  |
| H  | -0.484536 | 1.065772  | 2.655997  |
| N  | -2.196689 | 0.500227  | 0.396951  |
| C  | -2.780578 | 1.606056  | 1.222888  |
| C  | -2.465959 | -0.810634 | 1.066138  |
| C  | -2.818539 | 0.524821  | -0.951316 |
| N  | 0.192574  | 2.843358  | 0.579386  |
| C  | 1.457089  | 2.842811  | 1.351383  |
| C  | -0.922774 | 3.436433  | 1.358376  |
| C  | 0.352309  | 3.569728  | -0.696278 |
| C  | -2.321189 | 3.028161  | 0.881397  |
| N  | 2.055685  | 0.562696  | 0.342613  |
| C  | 2.520831  | 1.946668  | 0.717758  |
| C  | 2.496512  | -0.441878 | 1.369742  |
| C  | 2.660720  | 0.231347  | -0.974613 |
| N  | -0.289065 | -1.739697 | 0.142549  |
| C  | -1.738759 | -1.977244 | 0.399637  |
| C  | 0.569422  | -2.277698 | 1.233707  |
| C  | 0.052122  | -2.371818 | -1.149386 |
| C  | 2.057560  | -1.898544 | 1.144013  |
| H  | 1.874811  | 3.855689  | 1.426097  |
| H  | 1.236919  | 2.504363  | 2.360104  |
| H  | 3.367742  | 1.871658  | 1.403489  |
| H  | 2.893488  | 2.418602  | -0.188921 |
| H  | 2.552033  | -2.463294 | 1.940575  |
| H  | 2.491417  | -2.283860 | 0.220609  |
| H  | 0.162983  | -1.920025 | 2.176312  |
| H  | 0.501483  | -3.374913 | 1.229651  |
| H  | -0.800194 | 3.150179  | 2.405313  |
| H  | -0.842940 | 4.530872  | 1.332337  |
| H  | -2.440785 | 3.231257  | -0.184556 |
| H  | -3.027416 | 3.696611  | 1.381052  |
| H  | -2.560600 | 1.390828  | 2.268444  |



---

|   |           |           |           |
|---|-----------|-----------|-----------|
| H | -3.869718 | 1.552755  | 1.118659  |
| H | -2.391290 | -0.247563 | -1.581347 |
| H | -3.897490 | 0.367176  | -0.857539 |
| H | -2.632891 | 1.481778  | -1.429160 |
| H | -2.154339 | -0.713248 | 2.101364  |
| H | -3.541926 | -1.015197 | 1.046825  |
| H | -2.211296 | -2.194454 | -0.557295 |
| H | -1.879930 | -2.867892 | 1.021463  |
| H | 1.114763  | -2.290389 | -1.354778 |
| H | -0.211290 | -3.437292 | -1.145564 |
| H | -0.483487 | -1.872463 | -1.954149 |
| H | 2.364392  | -0.759741 | -1.295245 |
| H | 2.321795  | 0.942939  | -1.721155 |
| H | 3.752126  | 0.268046  | -0.899015 |
| H | 1.110018  | 3.096341  | -1.314003 |
| H | -0.580033 | 3.550798  | -1.255789 |
| H | 0.636591  | 4.613180  | -0.511815 |
| H | 3.592504  | -0.424455 | 1.389897  |
| H | 2.131511  | -0.093255 | 2.331085  |
| F | -0.091291 | 0.736816  | -1.484937 |
| H | -1.140037 | 2.869584  | 5.160767  |
| H | -1.869738 | 1.148139  | 5.168112  |
| H | -0.018496 | 1.378066  | 5.292324  |

$3\pi\text{IN}[\text{Fe}^{\text{IV}}=\text{O}(\text{TMC})(\text{F})]^+$

|    |           |           |           |
|----|-----------|-----------|-----------|
| Fe | -0.133616 | 0.612176  | 0.301658  |
| O  | -0.294704 | 0.501843  | 2.142928  |
| C  | 1.310852  | 1.987559  | 5.092220  |
| H  | 0.303068  | 1.042549  | 2.667769  |
| N  | -2.236621 | 0.548906  | 0.303137  |
| C  | -2.878466 | 1.644337  | 1.091940  |
| C  | -2.529318 | -0.735249 | 1.003727  |
| C  | -2.822576 | 0.534415  | -1.061958 |
| N  | 0.075980  | 2.699053  | 0.434526  |
| C  | 1.345537  | 2.890550  | 1.192042  |
| C  | -1.017526 | 3.381084  | 1.195238  |
| C  | 0.197150  | 3.344712  | -0.901372 |
| C  | -2.428859 | 3.052975  | 0.728787  |
| N  | 1.993506  | 0.614866  | 0.339182  |
| C  | 2.448232  | 2.021995  | 0.629055  |
| C  | 2.461413  | -0.310465 | 1.424007  |
| C  | 2.654723  | 0.234116  | -0.942636 |
| N  | -0.286776 | -1.518195 | 0.201651  |
| C  | -1.739775 | -1.866840 | 0.389896  |
| C  | 0.525535  | -2.097357 | 1.321339  |
| C  | 0.116852  | -2.152223 | -1.084728 |
| C  | 2.021020  | -1.770130 | 1.284940  |
| H  | 1.653971  | 3.940580  | 1.151745  |
| H  | 1.155517  | 2.663599  | 2.238802  |
| H  | 3.297933  | 2.005948  | 1.314708  |
| H  | 2.807142  | 2.451663  | -0.302928 |
| H  | 2.460773  | -2.292435 | 2.139737  |
| H  | 2.489388  | -2.220636 | 0.409523  |
| H  | 0.091859  | -1.735342 | 2.248561  |
| H  | 0.415389  | -3.187185 | 1.284581  |
| H  | -0.919855 | 3.091885  | 2.240315  |
| H  | -0.844544 | 4.460332  | 1.131044  |

---

|   |           |           |           |
|---|-----------|-----------|-----------|
| H | -2.563663 | 3.263306  | -0.333660 |
| H | -3.098731 | 3.742145  | 1.249646  |
| H | -2.646817 | 1.460795  | 2.138846  |
| H | -3.962700 | 1.556452  | 0.963106  |
| H | -2.365013 | -0.239632 | -1.666703 |
| H | -3.901677 | 0.363447  | -0.994669 |
| H | -2.638369 | 1.483691  | -1.555134 |
| H | -2.256546 | -0.598519 | 2.044877  |
| H | -3.599814 | -0.959663 | 0.944775  |
| H | -2.147859 | -2.118350 | -0.586672 |
| H | -1.828391 | -2.762569 | 1.008912  |
| H | 1.186232  | -2.090770 | -1.238184 |
| H | -0.164247 | -3.209543 | -1.072623 |
| H | -0.376193 | -1.644409 | -1.907258 |
| H | 2.482502  | -0.806568 | -1.179508 |
| H | 2.250756  | 0.837377  | -1.748786 |
| H | 3.733237  | 0.394714  | -0.854926 |
| H | 0.990961  | 2.883447  | -1.476874 |
| H | -0.724656 | 3.219615  | -1.459609 |
| H | 0.404612  | 4.410911  | -0.770229 |
| H | 3.556954  | -0.284701 | 1.433903  |
| H | 2.118317  | 0.088205  | 2.375042  |
| F | -0.098113 | 0.680230  | -1.555455 |
| H | 2.383199  | 1.960089  | 4.962953  |
| H | 0.791103  | 2.934332  | 5.068682  |
| H | 0.775614  | 1.085658  | 5.351352  |

$5\sigma$ IN-[Fe<sup>IV</sup>=O(TMC)(F)]<sup>+</sup>

|    |           |           |           |
|----|-----------|-----------|-----------|
| Fe | -0.186393 | 0.577783  | 0.312300  |
| O  | -0.386893 | 0.389666  | 2.172638  |
| C  | 0.383216  | 1.494611  | 5.278395  |
| H  | -0.092450 | 0.849625  | 2.965306  |
| N  | -2.401378 | 0.447390  | 0.226383  |
| C  | -3.004659 | 1.536899  | 1.050461  |
| C  | -2.624767 | -0.875142 | 0.879736  |
| C  | -2.971144 | 0.466828  | -1.138639 |
| N  | 0.049396  | 2.777682  | 0.585558  |
| C  | 1.273475  | 2.832407  | 1.433757  |
| C  | -1.127134 | 3.330742  | 1.320873  |
| C  | 0.256074  | 3.533515  | -0.671707 |
| C  | -2.499586 | 2.953961  | 0.746973  |
| N  | 2.063808  | 0.598901  | 0.453067  |
| C  | 2.424913  | 1.998493  | 0.869210  |
| C  | 2.427543  | -0.401318 | 1.505931  |
| C  | 2.794187  | 0.307670  | -0.805682 |
| N  | -0.313829 | -1.655580 | 0.107909  |
| C  | -1.775444 | -1.983855 | 0.259967  |
| C  | 0.497429  | -2.226005 | 1.230020  |
| C  | 0.135426  | -2.215555 | -1.190918 |
| C  | 1.990072  | -1.852475 | 1.238423  |
| H  | 1.621419  | 3.867579  | 1.531920  |
| H  | 1.004670  | 2.490207  | 2.428826  |
| H  | 3.229145  | 1.970157  | 1.609339  |
| H  | 2.829276  | 2.500347  | -0.007121 |
| H  | 2.424023  | -2.434076 | 2.057312  |
| H  | 2.479437  | -2.231069 | 0.340407  |
| H  | 0.034017  | -1.899638 | 2.156955  |

---

|   |           |           |           |
|---|-----------|-----------|-----------|
| H | 0.429567  | -3.319644 | 1.174223  |
| H | -1.068540 | 2.982484  | 2.351021  |
| H | -1.037087 | 4.422928  | 1.340238  |
| H | -2.551999 | 3.171848  | -0.321961 |
| H | -3.216444 | 3.635317  | 1.212601  |
| H | -2.798120 | 1.303016  | 2.092900  |
| H | -4.091585 | 1.509790  | 0.908895  |
| H | -2.493730 | -0.283704 | -1.761504 |
| H | -4.049583 | 0.275545  | -1.100290 |
| H | -2.795173 | 1.434458  | -1.600718 |
| H | -2.379904 | -0.756590 | 1.930381  |
| H | -3.678977 | -1.164174 | 0.795825  |
| H | -2.156222 | -2.220356 | -0.731861 |
| H | -1.889646 | -2.889355 | 0.862155  |
| H | 1.197913  | -2.054857 | -1.336739 |
| H | -0.059596 | -3.293015 | -1.226692 |
| H | -0.392699 | -1.720702 | -2.001296 |
| H | 2.612824  | -0.709788 | -1.131803 |
| H | 2.447379  | 0.977708  | -1.587705 |
| H | 3.871607  | 0.437332  | -0.657145 |
| H | 1.072455  | 3.103814  | -1.243389 |
| H | -0.637256 | 3.479997  | -1.287975 |
| H | 0.478430  | 4.582340  | -0.446243 |
| H | 3.519175  | -0.398427 | 1.615454  |
| H | 1.999341  | -0.059019 | 2.444450  |
| F | -0.073552 | 0.789066  | -1.565294 |
| H | 0.937594  | 0.575273  | 5.400082  |
| H | 0.911444  | 2.431511  | 5.175347  |
| H | -0.690034 | 1.494619  | 5.404029  |

$5\pi\text{IN}=[\text{Fe}^{\text{IV}}=\text{O}(\text{TMC})(\text{F})]^+$

|    |           |           |           |
|----|-----------|-----------|-----------|
| Fe | 0.011934  | 0.622624  | 0.258078  |
| O  | 0.201096  | 0.515773  | 2.058024  |
| C  | -0.605716 | 2.022860  | 5.132871  |
| H  | -0.197757 | 1.207476  | 2.596482  |
| N  | -2.083988 | 0.599864  | 0.550808  |
| C  | -2.561896 | 1.753378  | 1.379864  |
| C  | -2.314686 | -0.675795 | 1.298351  |
| C  | -2.834106 | 0.584351  | -0.731002 |
| N  | 0.361718  | 2.887614  | 0.398903  |
| C  | 1.694920  | 2.884827  | 1.044224  |
| C  | -0.659173 | 3.538140  | 1.257617  |
| C  | 0.410605  | 3.557661  | -0.915257 |
| C  | -2.106473 | 3.148115  | 0.934852  |
| N  | 2.143433  | 0.549535  | 0.086746  |
| C  | 2.671483  | 1.936776  | 0.349340  |
| C  | 2.659618  | -0.419356 | 1.112591  |
| C  | 2.613091  | 0.143749  | -1.264996 |
| N  | -0.256607 | -1.696111 | 0.211929  |
| C  | -1.679624 | -1.885782 | 0.615063  |
| C  | 0.689261  | -2.208967 | 1.241446  |
| C  | -0.053570 | -2.391333 | -1.076128 |
| C  | 2.170697  | -1.872286 | 0.997366  |
| H  | 2.140470  | 3.888496  | 1.035279  |
| H  | 1.566256  | 2.591520  | 2.082508  |
| H  | 3.582027  | 1.871421  | 0.949325  |
| H  | 2.959723  | 2.359272  | -0.611190 |

|   |           |           |           |
|---|-----------|-----------|-----------|
| H | 2.724926  | -2.413814 | 1.770366  |
| H | 2.508364  | -2.309156 | 0.056831  |
| H | 0.379616  | -1.802486 | 2.200981  |
| H | 0.597669  | -3.303003 | 1.293217  |
| H | -0.441100 | 3.286697  | 2.297666  |
| H | -0.558121 | 4.628407  | 1.180984  |
| H | -2.323910 | 3.310474  | -0.122440 |
| H | -2.746150 | 3.854784  | 1.470309  |
| H | -2.245765 | 1.575731  | 2.408092  |
| H | -3.656752 | 1.723811  | 1.384409  |
| H | -2.482237 | -0.220306 | -1.367391 |
| H | -3.900843 | 0.451891  | -0.526745 |
| H | -2.680492 | 1.518191  | -1.263178 |
| H | -1.903186 | -0.545325 | 2.294347  |
| H | -3.391465 | -0.854210 | 1.391277  |
| H | -2.246270 | -2.127714 | -0.283048 |
| H | -1.779767 | -2.747164 | 1.284106  |
| H | 0.985357  | -2.343658 | -1.385520 |
| H | -0.335120 | -3.449199 | -0.998792 |
| H | -0.655239 | -1.915105 | -1.847869 |
| H | 2.266469  | -0.852451 | -1.511191 |
| H | 2.221110  | 0.830590  | -2.008458 |
| H | 3.707321  | 0.154426  | -1.293263 |
| H | 1.100001  | 3.045551  | -1.580540 |
| H | -0.570394 | 3.532485  | -1.383669 |
| H | 0.725877  | 4.602505  | -0.803207 |
| H | 3.752554  | -0.429030 | 1.026675  |
| H | 2.397581  | -0.018924 | 2.087156  |
| F | -0.163869 | 0.715491  | -1.533331 |
| H | -0.644680 | 3.102415  | 5.114771  |
| H | -1.519213 | 1.453785  | 5.227225  |
| H | 0.348892  | 1.519264  | 5.178378  |

${}^3\sigma_{\text{IN}}\text{--}[\text{Fe}^{\text{IV}}=\text{O}(\text{TMC})(\text{CF}_3\text{CO}_2)]^+$

|    |           |           |           |
|----|-----------|-----------|-----------|
| Fe | -0.197222 | 0.567138  | 0.315981  |
| O  | -0.325859 | 0.372578  | 2.200085  |
| C  | 0.067484  | 1.652389  | 5.294384  |
| H  | -0.211451 | 0.908143  | 2.992427  |
| N  | -2.336786 | 0.481565  | 0.309139  |
| C  | -2.947905 | 1.547273  | 1.159764  |
| C  | -2.585566 | -0.842426 | 0.963286  |
| C  | -2.973154 | 0.511600  | -1.033135 |
| N  | 0.023993  | 2.694736  | 0.572985  |
| C  | 1.281877  | 2.773686  | 1.377864  |
| C  | -1.092981 | 3.302512  | 1.357283  |
| C  | 0.192264  | 3.468797  | -0.686565 |
| C  | -2.492396 | 2.969710  | 0.851951  |
| N  | 1.967979  | 0.567173  | 0.360345  |
| C  | 2.388957  | 1.966596  | 0.737518  |
| C  | 2.380303  | -0.398258 | 1.435715  |
| C  | 2.697546  | 0.237380  | -0.895673 |
| N  | -0.339313 | -1.589922 | 0.106274  |
| C  | -1.798675 | -1.935820 | 0.278757  |
| C  | 0.464786  | -2.186438 | 1.226705  |
| C  | 0.085525  | -2.203189 | -1.182243 |
| C  | 1.958016  | -1.852473 | 1.216228  |
| H  | 1.600776  | 3.817760  | 1.463940  |

---

|   |           |           |           |
|---|-----------|-----------|-----------|
| H | 1.064774  | 2.413661  | 2.377897  |
| H | 3.247881  | 1.920197  | 1.410246  |
| H | 2.728292  | 2.460435  | -0.169690 |
| H | 2.389649  | -2.410836 | 2.051901  |
| H | 2.438627  | -2.260528 | 0.326791  |
| H | 0.017495  | -1.848473 | 2.156049  |
| H | 0.357949  | -3.274265 | 1.155730  |
| H | -0.998170 | 2.967251  | 2.388539  |
| H | -0.949210 | 4.387561  | 1.352886  |
| H | -2.603857 | 3.209302  | -0.207123 |
| H | -3.179486 | 3.637902  | 1.376814  |
| H | -2.707448 | 1.309598  | 2.193383  |
| H | -4.034090 | 1.478183  | 1.040848  |
| H | -2.554734 | -0.258896 | -1.672143 |
| H | -4.048175 | 0.340224  | -0.925217 |
| H | -2.800305 | 1.469920  | -1.510080 |
| H | -2.286643 | -0.747057 | 2.001507  |
| H | -3.653646 | -1.078439 | 0.917236  |
| H | -2.206430 | -2.130413 | -0.710780 |
| H | -1.887716 | -2.865542 | 0.845022  |
| H | 1.144061  | -2.060322 | -1.357585 |
| H | -0.118889 | -3.277616 | -1.151509 |
| H | -0.460248 | -1.750894 | -2.001650 |
| H | 2.494292  | -0.776593 | -1.213311 |
| H | 2.391006  | 0.913111  | -1.685548 |
| H | 3.772699  | 0.339269  | -0.722273 |
| H | 1.003621  | 3.061177  | -1.279794 |
| H | -0.713748 | 3.420158  | -1.280788 |
| H | 0.418478  | 4.510449  | -0.441314 |
| O | -0.090574 | 0.724330  | -1.867747 |
| C | -0.427777 | 1.233676  | -2.974759 |
| O | -1.246792 | 2.110588  | -3.231100 |
| C | 0.368063  | 0.637750  | -4.190436 |
| F | -0.099105 | 1.065207  | -5.375033 |
| F | 1.675870  | 0.993243  | -4.127705 |
| F | 0.326096  | -0.714196 | -4.210062 |
| H | 3.473433  | -0.365358 | 1.496800  |
| H | 1.971447  | -0.033992 | 2.372723  |
| H | 1.142153  | 1.760489  | 5.258728  |
| H | -0.560168 | 2.531693  | 5.271253  |
| H | -0.367919 | 0.686504  | 5.506078  |

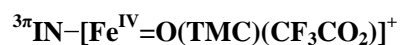

|    |           |           |           |
|----|-----------|-----------|-----------|
| Fe | -0.116531 | 0.677483  | 0.190544  |
| O  | -0.204972 | 0.567398  | 2.006518  |
| C  | 1.359818  | 1.886992  | 4.944696  |
| H  | 0.416940  | 1.105479  | 2.506353  |
| N  | -2.229505 | 0.578972  | 0.333514  |
| C  | -2.814194 | 1.687143  | 1.152877  |
| C  | -2.458876 | -0.699184 | 1.073955  |
| C  | -2.953648 | 0.528767  | -0.964296 |
| N  | 0.126400  | 2.769067  | 0.381564  |
| C  | 1.412979  | 2.930236  | 1.122732  |
| C  | -0.955470 | 3.427098  | 1.183869  |
| C  | 0.240636  | 3.492009  | -0.916711 |
| C  | -2.374284 | 3.087874  | 0.749125  |
| N  | 2.032794  | 0.674365  | 0.210076  |

|   |           |           |           |
|---|-----------|-----------|-----------|
| C | 2.495765  | 2.078122  | 0.503612  |
| C | 2.511002  | -0.247022 | 1.297908  |
| C | 2.709762  | 0.283749  | -1.060837 |
| N | -0.266252 | -1.480028 | 0.151903  |
| C | -1.707867 | -1.828830 | 0.413240  |
| C | 0.582588  | -2.027209 | 1.264397  |
| C | 0.099000  | -2.178292 | -1.112511 |
| C | 2.073698  | -1.705510 | 1.171418  |
| H | 1.722048  | 3.979810  | 1.104560  |
| H | 1.250809  | 2.680607  | 2.169055  |
| H | 3.371443  | 2.052639  | 1.155013  |
| H | 2.817429  | 2.523444  | -0.434465 |
| H | 2.544191  | -2.227402 | 2.009747  |
| H | 2.509729  | -2.154550 | 0.278942  |
| H | 0.177800  | -1.646807 | 2.196637  |
| H | 0.467568  | -3.116312 | 1.255272  |
| H | -0.826136 | 3.129240  | 2.222754  |
| H | -0.794129 | 4.507777  | 1.127800  |
| H | -2.525752 | 3.271456  | -0.316388 |
| H | -3.035912 | 3.788696  | 1.264291  |
| H | -2.527220 | 1.509864  | 2.186724  |
| H | -3.903635 | 1.605588  | 1.086207  |
| H | -2.563089 | -0.266590 | -1.590608 |
| H | -4.015233 | 0.342633  | -0.779215 |
| H | -2.835420 | 1.465707  | -1.496730 |
| H | -2.119158 | -0.551415 | 2.092784  |
| H | -3.529000 | -0.928878 | 1.090171  |
| H | -2.166646 | -2.077421 | -0.541324 |
| H | -1.763239 | -2.726698 | 1.032465  |
| H | 1.140562  | -2.026349 | -1.363727 |
| H | -0.075725 | -3.251593 | -0.993836 |
| H | -0.508930 | -1.804670 | -1.927879 |
| H | 2.460905  | -0.729406 | -1.345297 |
| H | 2.400651  | 0.947681  | -1.858745 |
| H | 3.792724  | 0.354896  | -0.926317 |
| H | 1.027014  | 3.058715  | -1.525789 |
| H | -0.689488 | 3.421359  | -1.467934 |
| H | 0.478129  | 4.541436  | -0.723389 |
| O | -0.086718 | 0.666182  | -1.820681 |
| C | -0.501007 | 1.115023  | -2.932819 |
| O | -1.296659 | 2.008690  | -3.188040 |
| C | 0.107956  | 0.344491  | -4.156667 |
| F | -0.094507 | 0.994579  | -5.313547 |
| F | 1.436753  | 0.145436  | -4.036263 |
| F | -0.468886 | -0.877440 | -4.277856 |
| H | 3.605616  | -0.216156 | 1.290398  |
| H | 2.185631  | 0.154820  | 2.253578  |
| H | 2.433604  | 1.870549  | 4.824800  |
| H | 0.835835  | 2.831778  | 4.957916  |
| H | 0.829900  | 0.974986  | 5.178534  |

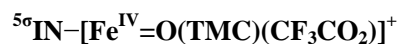

|    |           |          |          |
|----|-----------|----------|----------|
| Fe | -0.154879 | 0.576416 | 0.273641 |
| O  | -0.194574 | 0.413547 | 2.110553 |
| C  | -0.349316 | 1.543722 | 5.140780 |
| H  | -0.283164 | 0.889660 | 2.946915 |
| N  | -2.378984 | 0.432017 | 0.346075 |

---

|   |           |           |           |
|---|-----------|-----------|-----------|
| C | -2.901997 | 1.543771  | 1.199881  |
| C | -2.539035 | -0.879920 | 1.043533  |
| C | -3.112046 | 0.415148  | -0.941166 |
| N | 0.141689  | 2.773844  | 0.541876  |
| C | 1.405886  | 2.784915  | 1.337643  |
| C | -0.996568 | 3.327278  | 1.340266  |
| C | 0.313145  | 3.592345  | -0.683523 |
| C | -2.396238 | 2.947389  | 0.837701  |
| N | 2.109943  | 0.559576  | 0.294597  |
| C | 2.507163  | 1.959443  | 0.679393  |
| C | 2.506186  | -0.416288 | 1.363438  |
| C | 2.820223  | 0.230527  | -0.967259 |
| N | -0.294074 | -1.668132 | 0.116157  |
| C | -1.745665 | -1.988828 | 0.360663  |
| C | 0.563608  | -2.221246 | 1.217014  |
| C | 0.085219  | -2.296489 | -1.175393 |
| C | 2.056619  | -1.868635 | 1.145894  |
| H | 1.768627  | 3.812789  | 1.449121  |
| H | 1.184627  | 2.404392  | 2.329190  |
| H | 3.368894  | 1.926055  | 1.351088  |
| H | 2.839127  | 2.460713  | -0.227405 |
| H | 2.523212  | -2.436132 | 1.956579  |
| H | 2.499247  | -2.270186 | 0.233917  |
| H | 0.148230  | -1.869887 | 2.157011  |
| H | 0.474842  | -3.313654 | 1.187446  |
| H | -0.879775 | 2.995059  | 2.370931  |
| H | -0.905451 | 4.418514  | 1.347281  |
| H | -2.487624 | 3.131396  | -0.235143 |
| H | -3.087117 | 3.649609  | 1.310620  |
| H | -2.636969 | 1.318503  | 2.231094  |
| H | -3.995391 | 1.533444  | 1.134840  |
| H | -2.714682 | -0.355782 | -1.596319 |
| H | -4.173021 | 0.213436  | -0.761625 |
| H | -3.003313 | 1.369874  | -1.445745 |
| H | -2.206562 | -0.750511 | 2.067959  |
| H | -3.595478 | -1.169999 | 1.055069  |
| H | -2.192416 | -2.213169 | -0.606071 |
| H | -1.824027 | -2.899440 | 0.960240  |
| H | 1.129861  | -2.117104 | -1.403355 |
| H | -0.080649 | -3.377897 | -1.127991 |
| H | -0.511476 | -1.874873 | -1.977765 |
| H | 2.590353  | -0.778635 | -1.289620 |
| H | 2.511589  | 0.914943  | -1.751057 |
| H | 3.902351  | 0.310936  | -0.820528 |
| H | 1.100743  | 3.182056  | -1.309248 |
| H | -0.606096 | 3.597035  | -1.260684 |
| H | 0.577982  | 4.618399  | -0.408890 |
| O | -0.109617 | 0.732224  | -1.784620 |
| C | -0.523130 | 1.265831  | -2.862997 |
| O | -1.366715 | 2.131073  | -3.038561 |
| C | 0.213324  | 0.705145  | -4.127947 |
| F | -0.305470 | 1.177394  | -5.271432 |
| F | 1.523229  | 1.049812  | -4.108839 |
| F | 0.155405  | -0.643523 | -4.186300 |
| H | 3.600765  | -0.409898 | 1.429422  |
| H | 2.108199  | -0.047299 | 2.304307  |
| H | 0.534081  | 2.166483  | 5.123609  |

---

|                                                                                        |           |           |           |
|----------------------------------------------------------------------------------------|-----------|-----------|-----------|
| H                                                                                      | -1.327603 | 2.002003  | 5.109975  |
| H                                                                                      | -0.258525 | 0.494502  | 5.383547  |
| $5\pi\text{IN}-[\text{Fe}^{\text{IV}}=\text{O}(\text{TMC})(\text{CF}_3\text{CO}_2)]^+$ |           |           |           |
| Fe                                                                                     | -0.132123 | 0.745841  | 0.154754  |
| O                                                                                      | -0.268077 | 0.750545  | 1.970107  |
| C                                                                                      | 1.480797  | 1.398340  | 4.903070  |
| H                                                                                      | 0.548067  | 0.872015  | 2.466437  |
| N                                                                                      | -2.257752 | 0.589788  | 0.286246  |
| C                                                                                      | -2.815293 | 1.742758  | 1.072896  |
| C                                                                                      | -2.455182 | -0.675325 | 1.062781  |
| C                                                                                      | -2.983789 | 0.498726  | -1.006216 |
| N                                                                                      | 0.153891  | 2.998592  | 0.329778  |
| C                                                                                      | 1.405192  | 3.047614  | 1.128636  |
| C                                                                                      | -0.985819 | 3.577502  | 1.101155  |
| C                                                                                      | 0.334113  | 3.756531  | -0.930176 |
| C                                                                                      | -2.370791 | 3.136939  | 0.618357  |
| N                                                                                      | 2.043135  | 0.732951  | 0.246144  |
| C                                                                                      | 2.486866  | 2.146585  | 0.543628  |
| C                                                                                      | 2.509178  | -0.196390 | 1.332643  |
| C                                                                                      | 2.704752  | 0.330121  | -1.028322 |
| N                                                                                      | -0.261979 | -1.587947 | 0.176714  |
| C                                                                                      | -1.710832 | -1.851038 | 0.443177  |
| C                                                                                      | 0.579598  | -2.020053 | 1.331760  |
| C                                                                                      | 0.114028  | -2.353922 | -1.034621 |
| C                                                                                      | 2.067452  | -1.660862 | 1.227426  |
| H                                                                                      | 1.800659  | 4.069473  | 1.162004  |
| H                                                                                      | 1.167572  | 2.770116  | 2.151994  |
| H                                                                                      | 3.341057  | 2.122685  | 1.223342  |
| H                                                                                      | 2.842644  | 2.574972  | -0.390062 |
| H                                                                                      | 2.555691  | -2.164098 | 2.067007  |
| H                                                                                      | 2.505384  | -2.114805 | 0.338487  |
| H                                                                                      | 0.151801  | -1.584534 | 2.231456  |
| H                                                                                      | 0.504814  | -3.111188 | 1.421900  |
| H                                                                                      | -0.866456 | 3.282064  | 2.141845  |
| H                                                                                      | -0.914222 | 4.670090  | 1.056197  |
| H                                                                                      | -2.467792 | 3.256078  | -0.463215 |
| H                                                                                      | -3.087950 | 3.838172  | 1.052425  |
| H                                                                                      | -2.526915 | 1.595561  | 2.110356  |
| H                                                                                      | -3.905994 | 1.672605  | 1.013199  |
| H                                                                                      | -2.584422 | -0.307373 | -1.614428 |
| H                                                                                      | -4.042297 | 0.301919  | -0.814023 |
| H                                                                                      | -2.883415 | 1.427586  | -1.557475 |
| H                                                                                      | -2.113899 | -0.492427 | 2.075347  |
| H                                                                                      | -3.522993 | -0.914660 | 1.094685  |
| H                                                                                      | -2.173690 | -2.119404 | -0.504709 |
| H                                                                                      | -1.821633 | -2.719762 | 1.099450  |
| H                                                                                      | 1.163510  | -2.219258 | -1.273607 |
| H                                                                                      | -0.069801 | -3.423469 | -0.880921 |
| H                                                                                      | -0.471287 | -2.010527 | -1.882450 |
| H                                                                                      | 2.411709  | -0.671443 | -1.317300 |
| H                                                                                      | 2.416842  | 1.009822  | -1.822080 |
| H                                                                                      | 3.790180  | 0.361574  | -0.897597 |
| H                                                                                      | 1.121589  | 3.312475  | -1.534233 |
| H                                                                                      | -0.580824 | 3.733474  | -1.512760 |
| H                                                                                      | 0.603211  | 4.794748  | -0.706866 |
| O                                                                                      | -0.048772 | 0.639528  | -1.815512 |



---

|   |           |           |           |
|---|-----------|-----------|-----------|
| C | -0.490532 | 1.128576  | -2.906395 |
| O | -1.193449 | 2.102700  | -3.114235 |
| C | -0.050949 | 0.274129  | -4.143787 |
| F | -0.253160 | 0.923528  | -5.300017 |
| F | 1.249974  | -0.073931 | -4.097260 |
| F | -0.773362 | -0.872574 | -4.192820 |
| H | 3.604318  | -0.178165 | 1.323073  |
| H | 2.215527  | 0.218371  | 2.296053  |
| H | 2.425465  | 1.899397  | 4.747511  |
| H | 0.573679  | 1.977103  | 4.999720  |
| H | 1.462347  | 0.336632  | 5.103405  |
